# Supplementary material
Source: PubMed Central journal article supplement (PMC2234100)
Supplement: pnas_0706851105_1.pdf [file pnas_0706851105_1.pdf]

## SI Appendix

Here we present a detailed description of the map equation that serves as our objective function, followed by a step-by-step overview of the computational procedure that we use to minimize it. Thereafter we illustrate the procedure for the greedy search in 22 subsequent slides, which show how the method operates to find successively shorter encodings that highlight and exploit regularities in the network structure. Finally we present the maps from Figs. 3 and 4 in the paper, along with a listing of the complete set of fields and a listing of all journals within the fields.

### The map equation

Define a *module partition*  $M$  as a hard partition of a set of  $n$  nodes into  $m$  modules such that each node is assigned to one and only one module. The map equation  $L(M)$  gives the average number of bits per step that it takes to describe an infinite random walk on a network partitioned according to  $M$ :

$$L(M) = q_{\sim} H(Q) + \sum_{i=1}^m p_{\circlearrowleft}^i H(P^i). \quad (1)$$

Below, we define and expand these terms, but first a note about the general approach. The map equation calculates the minimum description length of a random walk on the network for a two-level code that separates the important structures from the insignificant details based on the partition  $M$ . As described in the main text, this two-level code uses unique codewords to name the modules specified by partition  $M$  but reuses the codewords used to name the individual nodes within each module. The first term of this equation (in red) gives the average number of bits necessary to describe movement between modules, and the second term (in blue) gives the average number of bits necessary to describe movement within modules.

To efficiently describe a random walk using a two-level code of this sort, the choice of partition  $M$  must reflect the patterns of flow within the network, with each module corresponding to a cluster of nodes in which a random walker spends a long period of time before departing for another module. To find the best such partition, we therefore seek to minimize the map equation over all possible partitions  $M$ . We begin by expanding the terms in the map equation. For clarity we here use  $i, j$  to enumerate modules,  $\alpha, \beta$  to enumerate nodes, **red terms to describe movements between the modules**, and **blue terms to describe movements within the modules**.

The per step probability that the random walker switches modules is

$$q_{\sim} = \sum_{i=1}^m q_{i\sim}, \quad (2)$$

where  $q_{i\sim}$  is the per step probability that the random walker exits module  $i$ . This probability depends on the partitioning of the network and will be derived in Eq. 7.

The entropy of movements between modules is

$$H(Q) = \sum_{i=1}^m \frac{q_{i\sim}}{\sum_{j=1}^m q_{j\sim}} \log \left( \frac{q_{i\sim}}{\sum_{j=1}^m q_{j\sim}} \right), \quad (3)$$

which is the lower limit of the average length of a codeword used to name a module. Here we have used Shannon's source coding theorem (1) and treated the modules as  $m$  states of a random variable  $X$  that occur with frequencies  $q_{i\sim} / \sum_{j=1}^m q_{j\sim}$ . Combining Eqs. 2 and 3, the first term in the map equation is the per step average description length of movements between modules within the random walk.

To weight the entropy of movements within module  $i$ , we compute

$$p_{\circlearrowleft}^i = q_{i\sim} + \sum_{\alpha \in i} p_{\alpha}, \quad (4)$$

where the notation  $\alpha \in i$  means "over all nodes  $\alpha$  in module  $i$ " and  $p_{\alpha}$  is the ergodic node visit frequency at node  $\alpha$  within the random walk. We use the power method, to be explained in detail on next page, to calculate this probability. Because the exit codewords are necessary to separate within-module movements from between-module movements, we include the probability of exiting module  $i$ ,  $q_{i\sim}$ , in the weight of within-module movements in module  $i$ . In this way we can guarantee efficient coding: by encoding the exit codewords together with the within-module codewords, we appropriately adjust the length of the exit codewords to the frequency of their use.

Finally, the entropy of movements within module  $i$  is

$$H(P^i) = \frac{q_{i\sim}}{q_{i\sim} + \sum_{\beta \in i} p_{\beta}} \log \left( \frac{q_{i\sim}}{q_{i\sim} + \sum_{\beta \in i} p_{\beta}} \right) \quad (5a)$$

$$+ \sum_{\alpha \in i} \frac{p_{\alpha}}{q_{i\sim} + \sum_{\beta \in i} p_{\beta}} \log \left( \frac{p_{\alpha}}{q_{i\sim} + \sum_{\beta \in i} p_{\beta}} \right) \quad (5b)$$

which is the lower limit of the average length of a codeword used to name a node (exit code included) in module  $i$ . The single term in Eq. 5a is the contribution from the exit codeword and the sum in Eq. 5b is the contribution from the codewords naming the nodes. Combining Eqs. 4 and 5 and summing over all modules makes it easy to identify the second term in the map equation as the per step average description length of movements within modules of the random walk.

By collecting the terms and simplifying, we get the final ex-

pression for the map equation

$$L(M) = \left( \sum_{i=1}^m q_{i\curvearrowright} \right) \log \left( \sum_{i=1}^m q_{i\curvearrowright} \right) \quad (6a)$$

$$- (1 + 1) \sum_{i=1}^m q_{i\curvearrowright} \log (q_{i\curvearrowright}) - \sum_{\alpha=1}^n p_{\alpha} \log (p_{\alpha}) \quad (6b)$$

$$+ \sum_{i=1}^m \left( q_{i\curvearrowright} + \sum_{\alpha \in i} p_{\alpha} \right) \log \left( q_{i\curvearrowright} + \sum_{\alpha \in i} p_{\alpha} \right). \quad (6c)$$

Note that the map equation is only a function of the ergodic node visit frequencies  $p_{\alpha}$  and the exit probabilities  $q_{i\curvearrowright}$ , which both can be easily calculated. Moreover, because the term  $\sum_{\alpha=1}^n p_{\alpha} \log (p_{\alpha})$  is independent of partitioning and  $p_{\alpha}$  otherwise only shows up summed over all nodes in a module, it is sufficient to keep track of changes in  $q_{i\curvearrowright}$  and  $\sum_{\alpha \in i} p_{\alpha}$  in the optimization algorithm. They can easily be derived for any partition of the network or quickly updated when they change in each step of the optimization procedure using the ergodic node visit frequencies.

- *Ergodic node visit frequencies.* We use the power method to calculate the steady state visit frequency for each node. To guarantee a unique steady state distribution for directed networks, we introduce a small teleportation probability  $\tau$  in the random walk that links every node to every other node with positive probability and thereby convert the random walker into a *random surfer*. The movement of the random surfer can now be described by an irreducible and aperiodic Markov chain that has a unique steady state by the Perron-Frobenius theorem. To generate the ergodic node visit frequencies, we start with a distribution of  $p_{\alpha} = 1/n$  for the random surfer to start at each node  $\alpha$ . The surfer moves as follows: at each time step, with probability  $1 - \tau$  the random surfer follows one of the outgoing links from the node  $\alpha$  that it currently occupies, with probability proportional to the weights of the outgoing links  $w_{\alpha\beta}$  from  $\alpha$  to  $\beta$ . It is therefore convenient to set  $\sum_{\beta} w_{\alpha\beta} = 1$ . With the remaining probability  $\tau$ , or with probability 1 if the node does not have any outlinks, the random surfer “teleports” with uniform probability to a random node anywhere in the system. As in Google’s PageRank algorithm (2), we use  $\tau = 0.15$ , but emphasize that the results are robust to this choice.
- *Exit probabilities.* Given the ergodic node visit frequencies  $p_{\alpha}$ ,  $\alpha = 1, \dots, n$  and an initial partitioning of the network, it is easy to calculate the ergodic module visit frequencies  $\sum_{\alpha \in i} p_{\alpha}$  for module  $i$ . The exit probability for module  $i$ , with teleportation taken into account is then

$$q_{i\curvearrowright} = \tau \frac{n - n_i}{n - 1} \sum_{\alpha \in i} p_{\alpha} + (1 - \tau) \sum_{\alpha \in i} \sum_{\beta \notin i} p_{\alpha} w_{\alpha\beta}, \quad (7)$$

where  $n_i$  is the number of nodes in module  $i$ . This equation follows since every node teleports a fraction  $\tau(n -$

$n_i)/(n - 1)$  and guides a fraction  $(1 - \tau) \sum_{\beta \notin i} w_{\alpha\beta}$  of its weight  $p_{\alpha}$  to nodes outside of the module.

## Implementation

Finding the map that provides the minimal description length of the data, given the requirement that modules receive unique names, is now a standard computational optimization problem. Below we describe how we first use a deterministic greedy search algorithm (3, 4) and then refine the results with a simulated annealing approach (5, 6) with the heat-bath algorithm. Our implementation, written in C++, is available upon request.

1. *Greedy search.* We first calculate the ergodic node visit frequencies and then assign every node to a unique module and derive the exit probabilities as described above. We use the map equation to calculate the description length and repeatedly merge the two modules that give the largest decrease in description length until further merging gives a longer description (3, 4). With the improved version in ref. (4) of the greedy search algorithm in ref. (3), we have successfully partitioned networks with 2.6 million nodes and 29 million links. Starting at the next page, we illustrate the greedy search for the example network in Fig. 1 of the paper.
2. *Simulated annealing.* The result of the previous step can typically be refined by simulated annealing (5, 6). We use the heat-bath algorithm (7) and start with the module configuration achieved by the greedy search. Starting the heat-bath algorithm at several different temperatures, we select the run that gives the shortest description of the map, i.e., the minimal value of the map equation. This step can improve the description length by up to several percent over that found by the greedy search alone.
3. *Visualization.* We set the area of every module to be proportional to the fraction of time a random surfer spends in the module, and the area of the bordering ring to be proportional to the exit probability. Similarly, we vary the widths of the links in accord with the transition probabilities between modules (excluding teleportation).

## References

1. C. E. Shannon, *Bell Labs Tech J* **27**, 379 (1948).
2. S. Brin, L. Page, *Computer networks and ISDN systems* **33**, 107 (1998).
3. A. Clauset, M. E. J. Newman, C. Moore, *Phys Rev E* **70**, 066111 (2004).
4. K. Wakita, T. Tsurumi, arXiv:cs/07020480 (2007).
5. S. Kirkpatrick, J. C. D. Gelatt, M. P. Vecchi, *Science* **220**, 671 (1983).
6. R. Guimerà, L. A. N. Amaral, *Nature* **433**, 895 (2005).
7. M. E. J. Newman, G. T. Barkema, *Monte Carlo methods in statistical physics* (Oxford University Press, 1999).

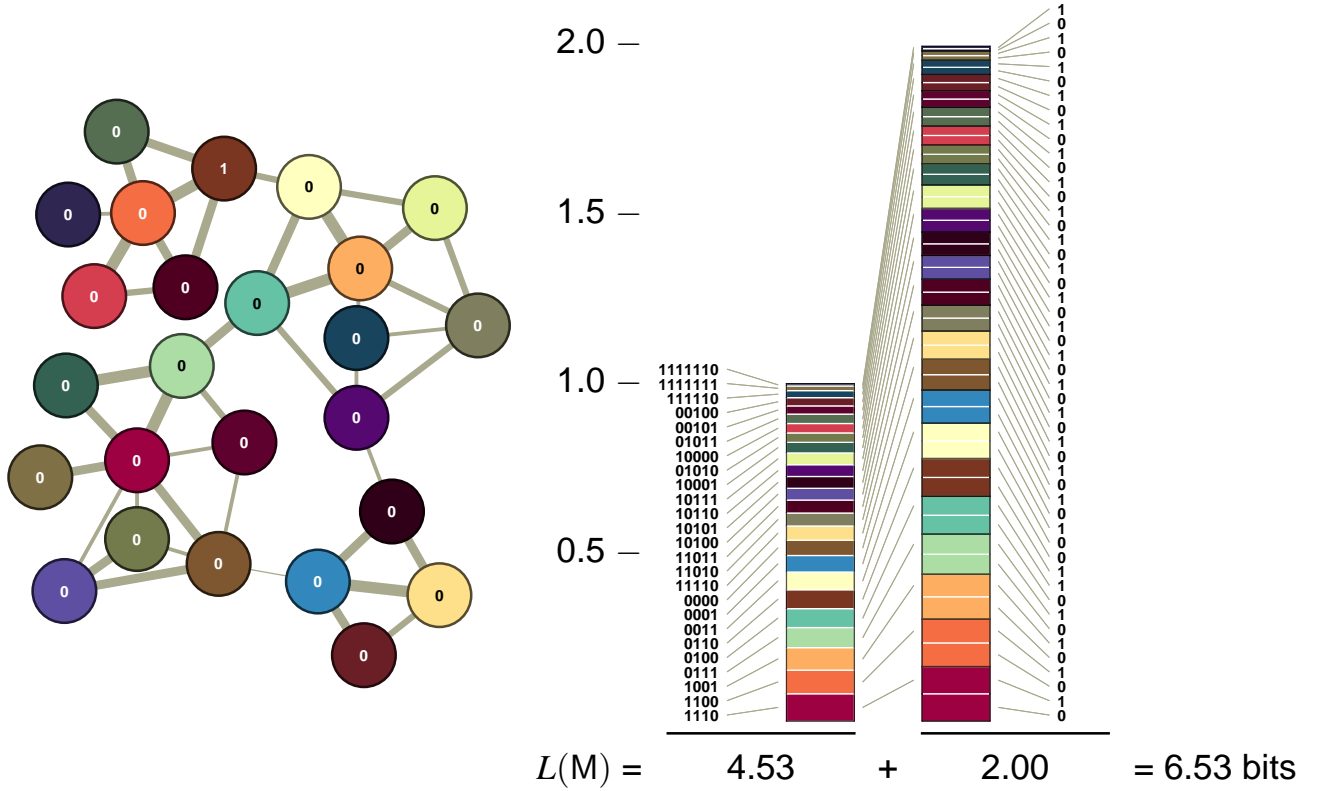

Fig. 5 The greedy search algorithm begins with each node  $\alpha = 1, \dots, n$  in its own module  $i = 1, \dots, m$ , as shown here. The slides on the following 22 pages show how the greedy search operates, finding successively shorter encodings that highlight and exploit regularities in the network structure. Node colors indicate module identity. To illustrate the duality between module detection and coding, the code structure corresponding to the current partition is shown by the stacked boxes on the right. The height of each box corresponds to the per step rate of codeword use.

The left stack represents the codes associated with movements between modules. The height of each box is equal to the exit probability  $q_{i\sim}$  of the corresponding module  $i$ . Boxes are ordered according to their heights. The codewords naming the modules are the Huffman codes calculated from the probabilities  $q_{i\sim}/q_{\sim}$ , where  $q_{\sim} = \sum_1^m q_{i\sim}$  is the total height of the left stack. The length of the codeword naming module  $i$  is approximately  $-\log q_{i\sim}/q_{\sim}$ , the Shannon limit in the map equation. In the figure, the per step description length of the random walker's movements between modules is the sum of the length of the codewords weighted by their use. This length is bounded below by the limit  $-\sum_1^m q_{i\sim} \log q_{i\sim}/q_{\sim}$  that we use in the paper.

The right stack is associated with movements within modules. The height of each box in module  $i$  is equal to the ergodic node visit probabilities  $p_{\alpha \in i}$  or the exit probability  $q_{i\sim}$ . The boxes corresponding to the same module are collected together and ordered according to their weight; in turn the modules are ordered according to their total weights  $p_{\circ}^i = q_{i\sim} + \sum_{\alpha \in i} p_{\alpha}$ . The codewords naming the nodes and exit in each module  $i$  are the Huffman codes calculated from the probabilities  $p_{\alpha \in i}/p_{\circ}^i$  (nodes) and  $q_{i\sim}/p_{\circ}^i$  (exit). The length of codewords naming nodes  $\alpha \in i$  and exit from module  $i$  are approximately  $-\log(p_{\alpha \in i}/p_{\circ}^i)$  (nodes) and  $-\log(q_{i\sim}/p_{\circ}^i)$  (exit). In the figure, the per step description length of the random walker's movements within modules is the sum of the length of the codewords weighted by their use. This length is bounded below by the limit  $-\sum_1^m [q_{i\sim} \log(q_{i\sim}/p_{\circ}^i) + \sum_{\alpha \in i} p_{\alpha} \log(p_{\alpha}/p_{\circ}^i)]$ .

The total description length  $L(M)$  for the module partition  $M$  of the network is the sum of the contributions from movements between and within modules and it takes a minimum value for the partitioning into four models on the last slide.

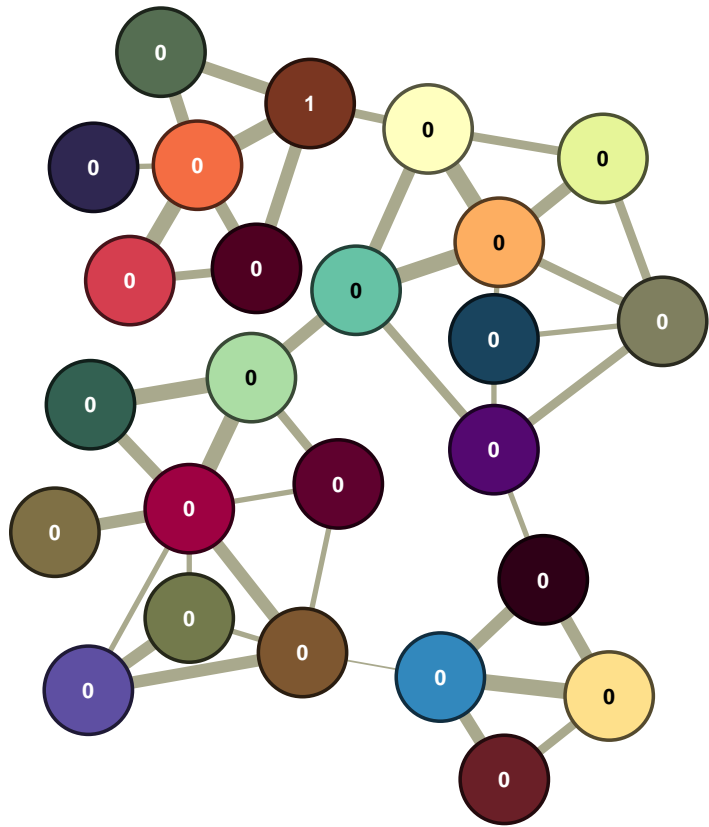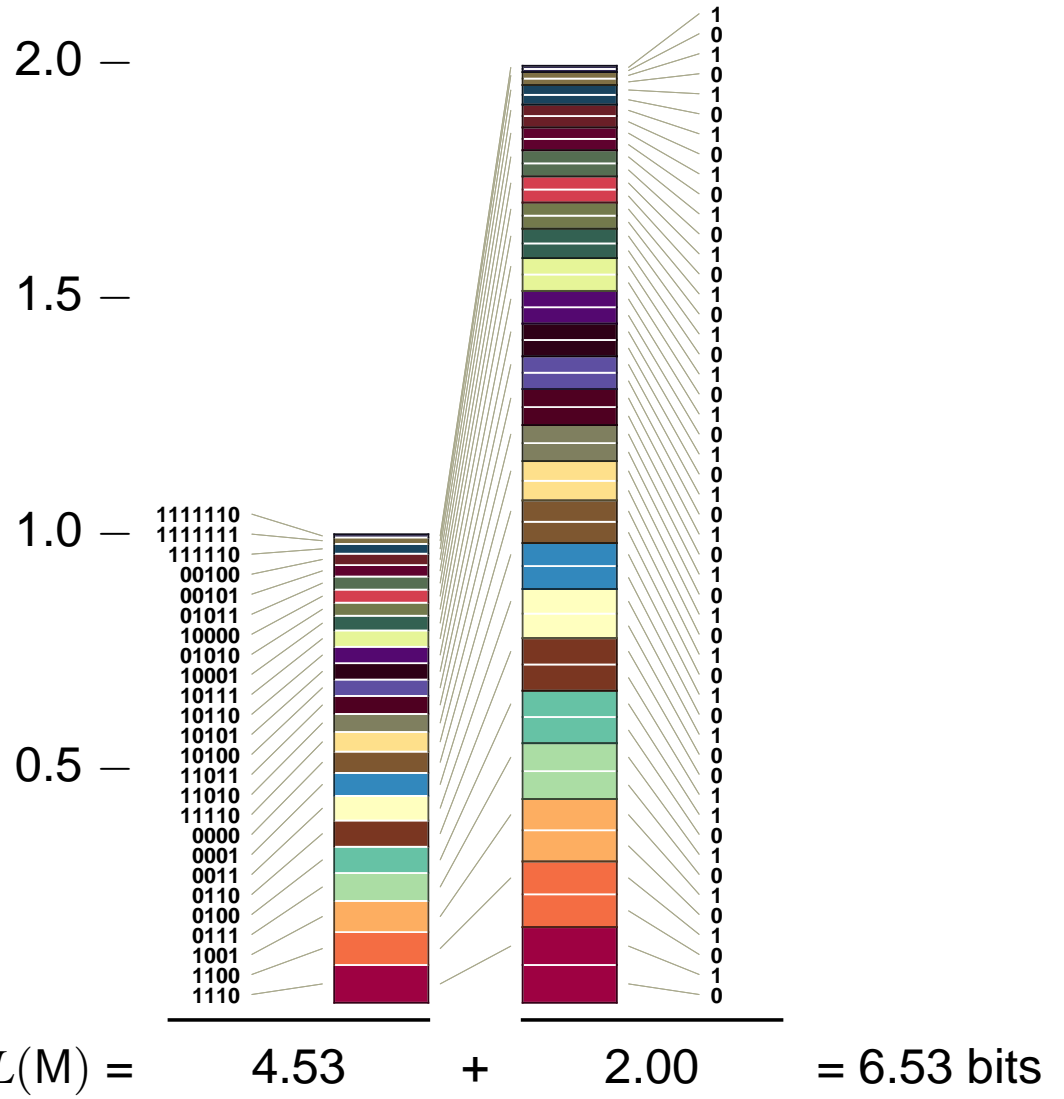

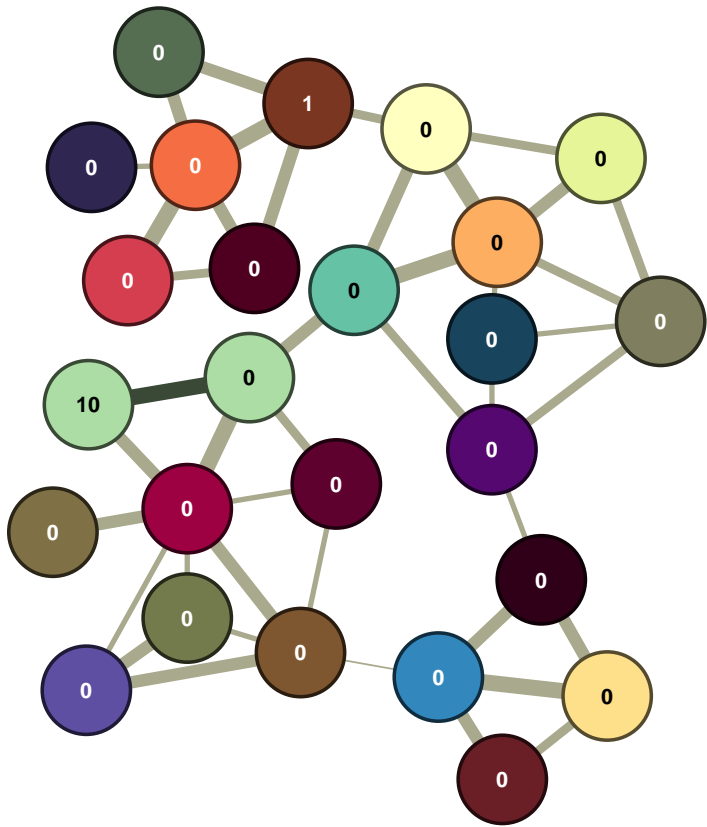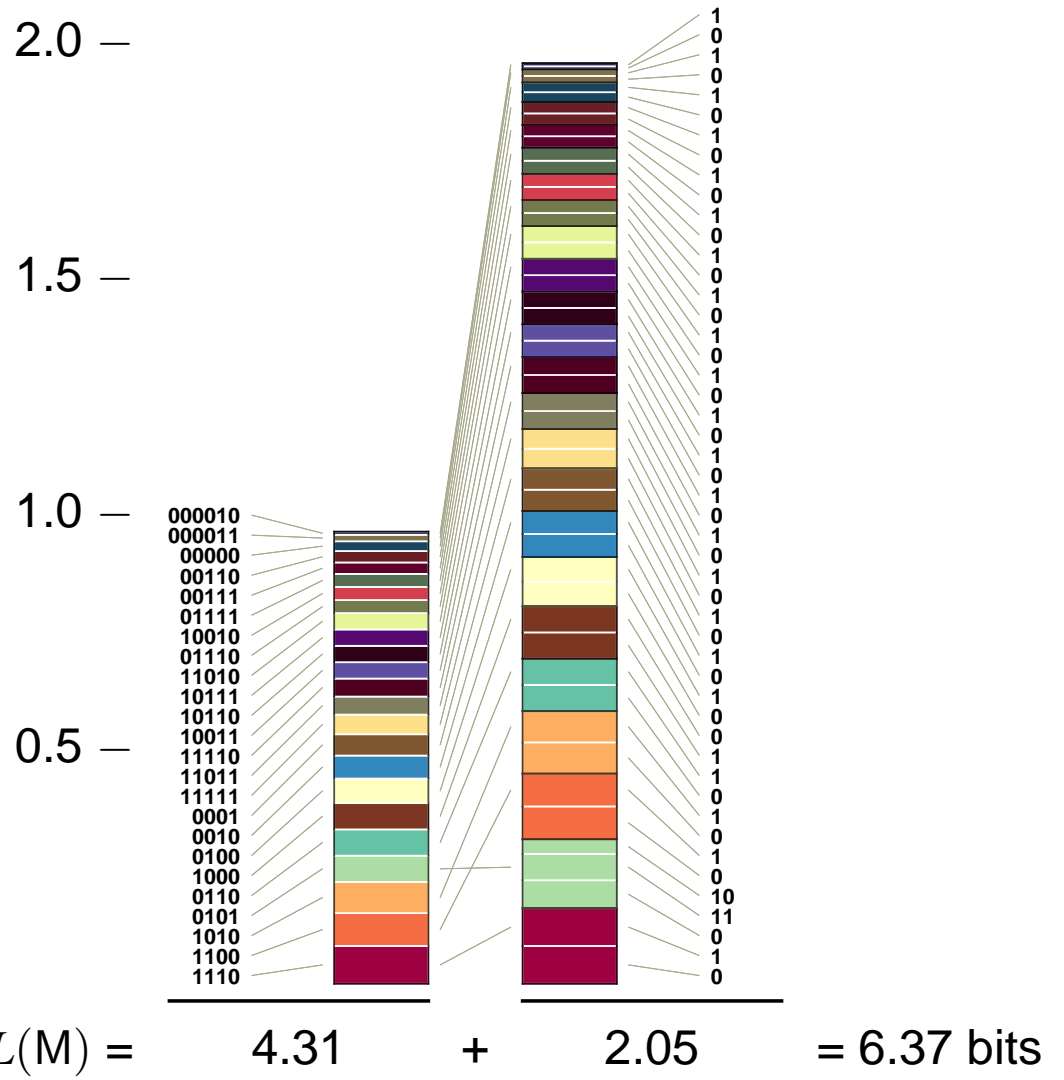

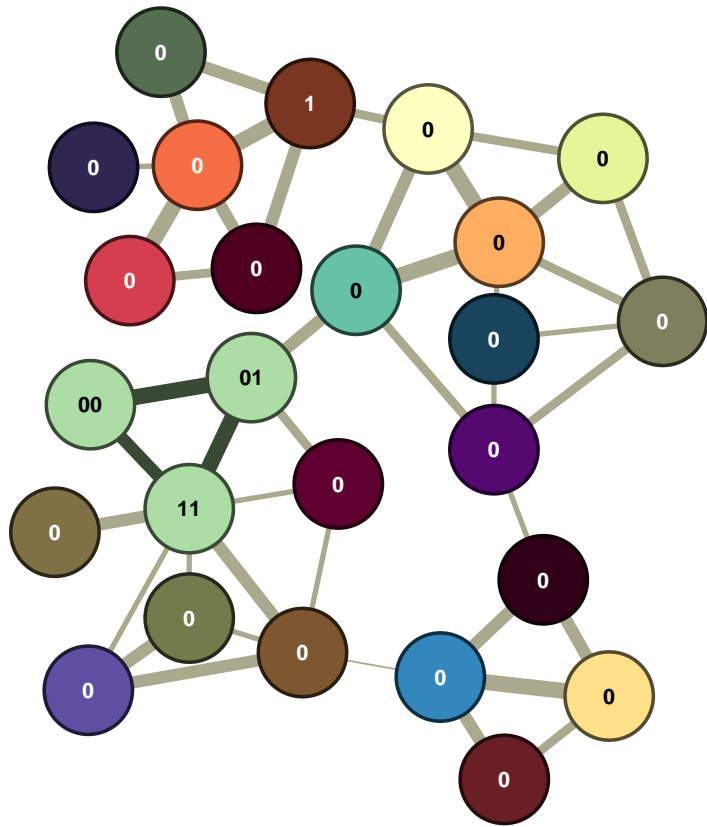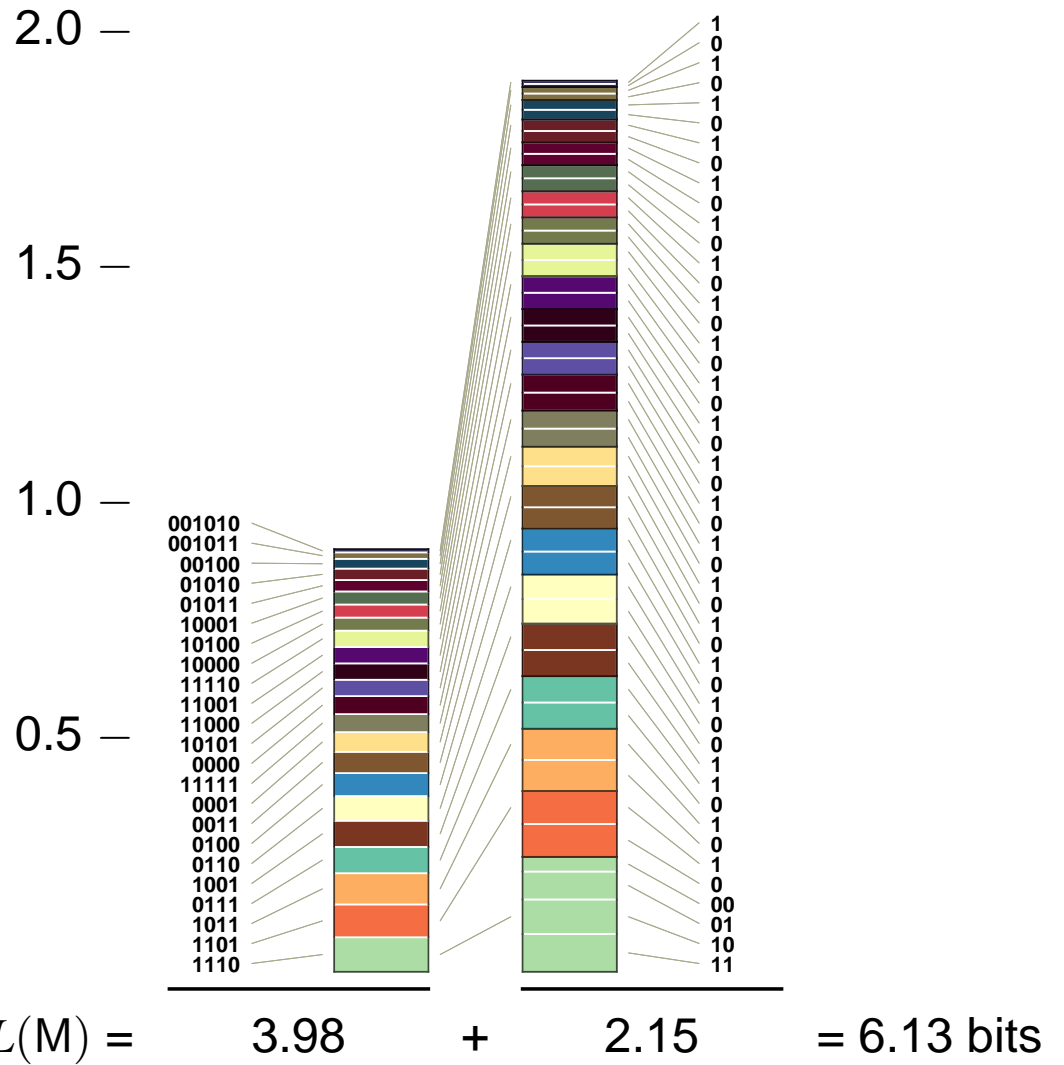

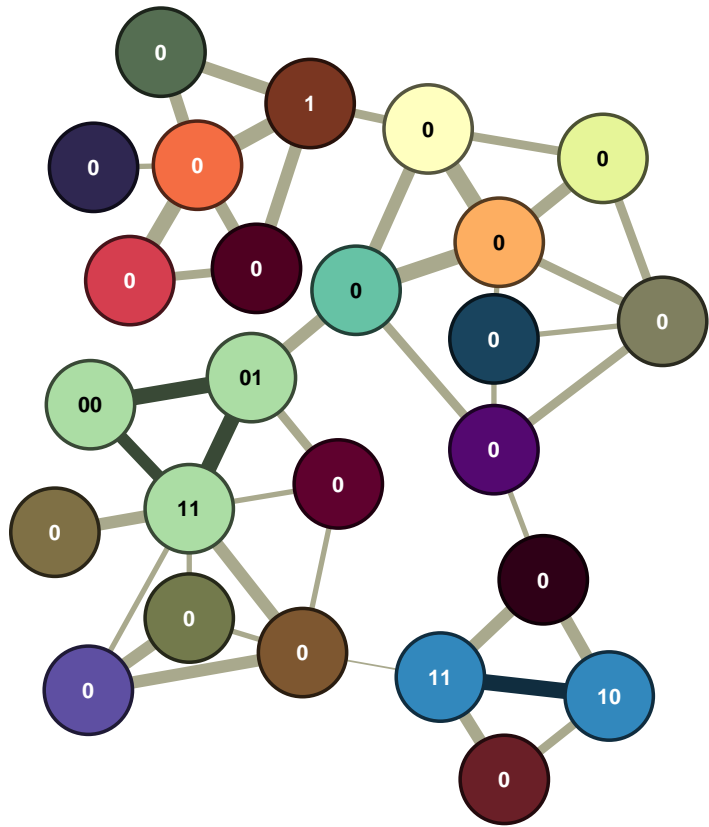

2.0 —

1.5 —

1.0 —

0.5 —

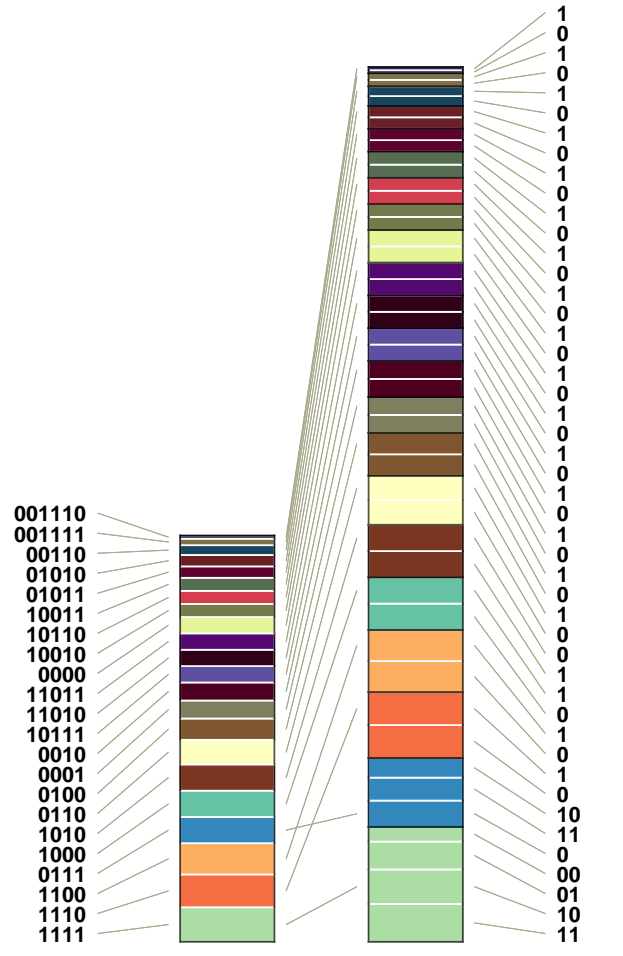

$$L(M) = 3.77 + 2.20 = 5.97 \text{ bits}$$

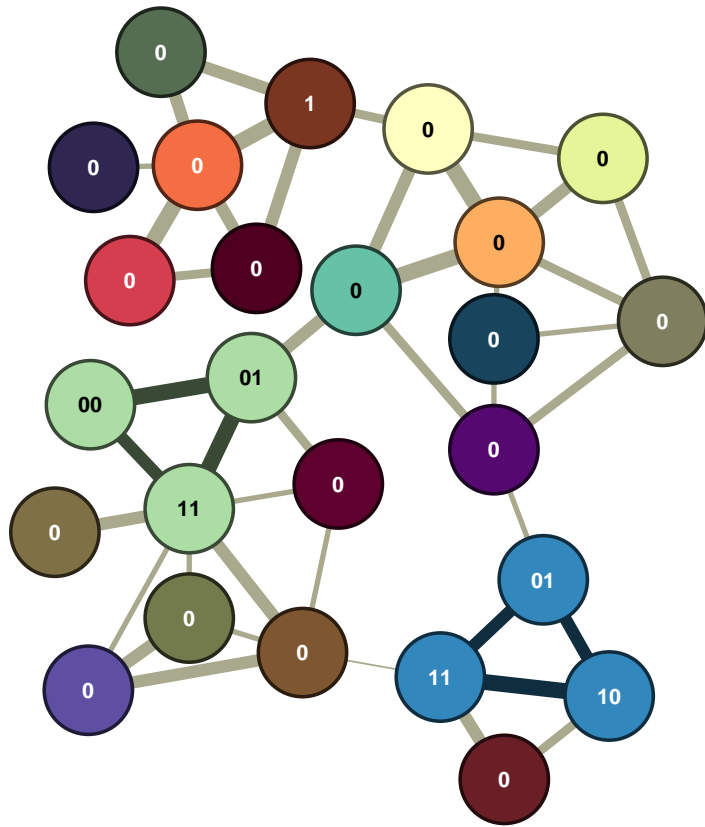

2.0 —

1.5 —

1.0 —

0.5 —

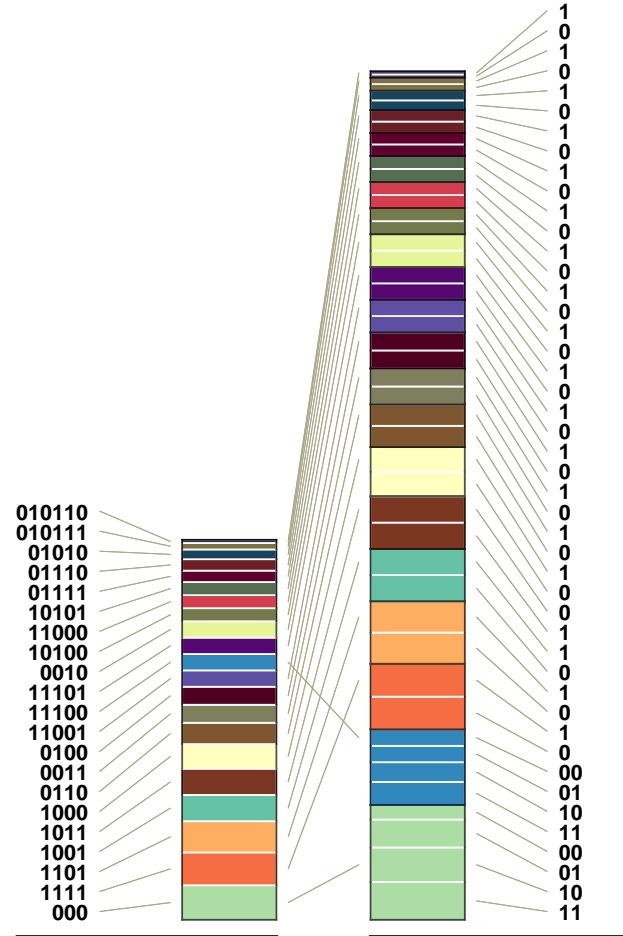

$L(M) = 3.47 + 2.22 = 5.69 \text{ bits}$



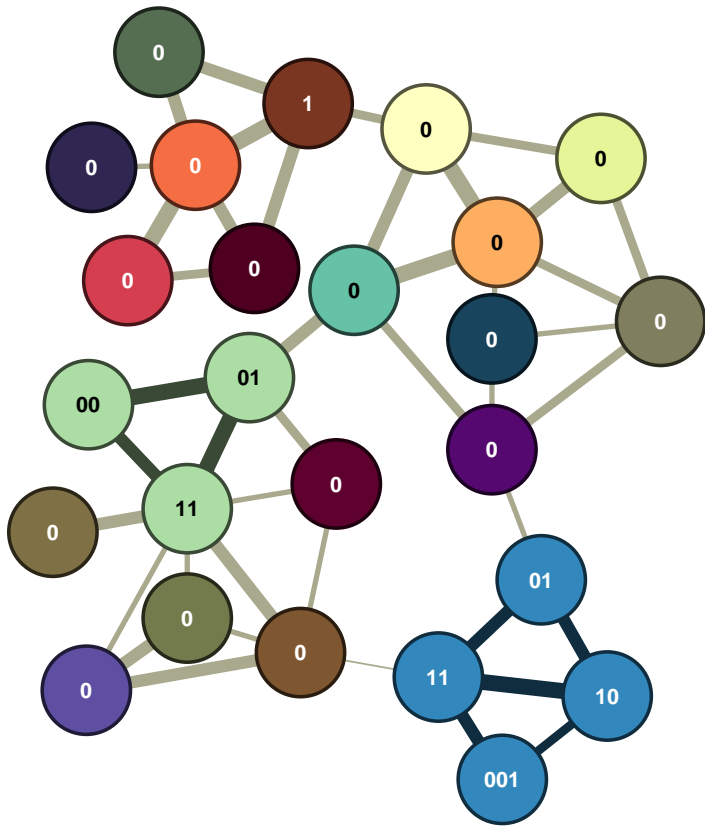

2.0 —

1.5 —

1.0 —

0.5 —

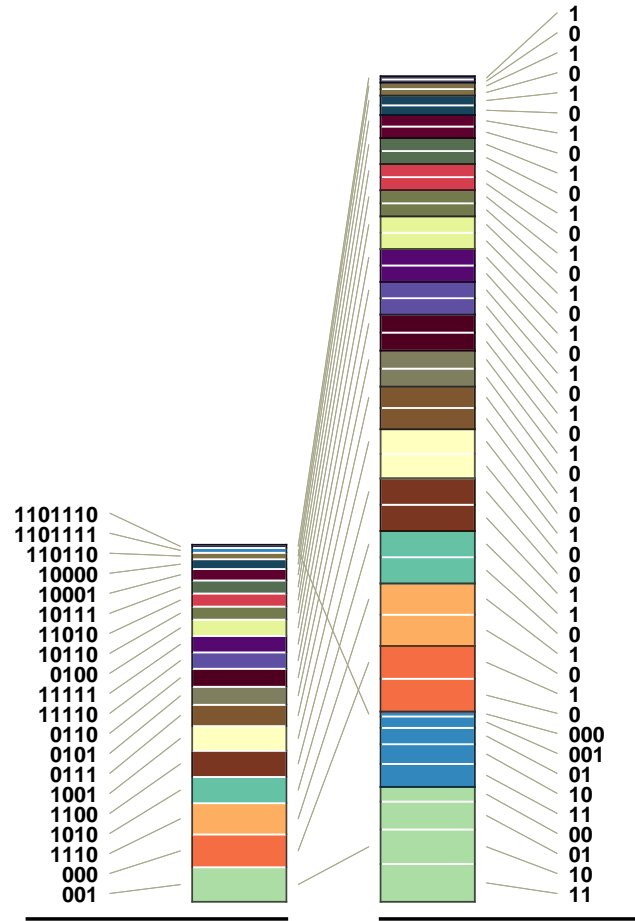

$L(M) = 3.19 + 2.20 = 5.39 \text{ bits}$



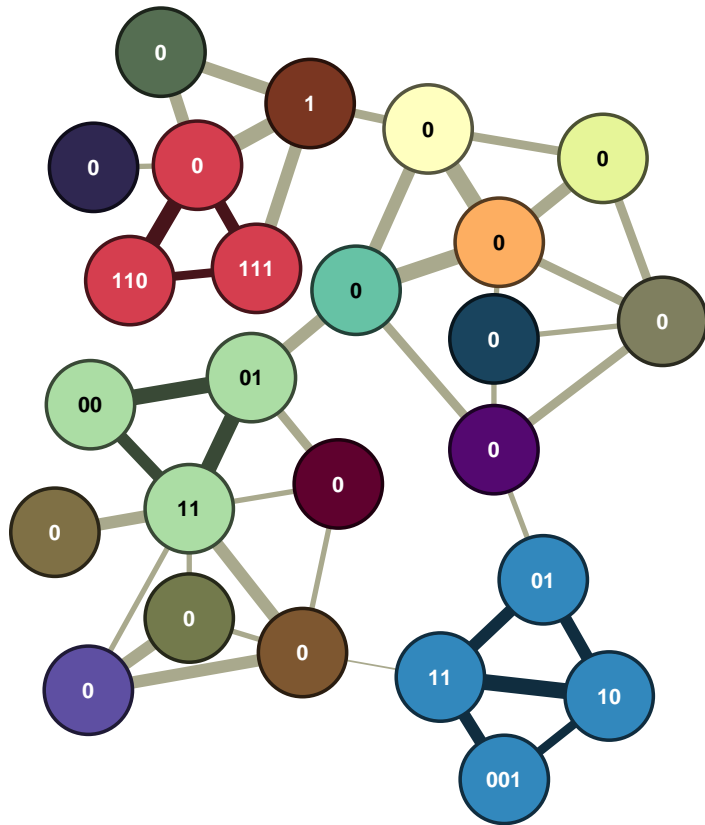

2.0 —

1.5 —

1.0 —

0.5 —

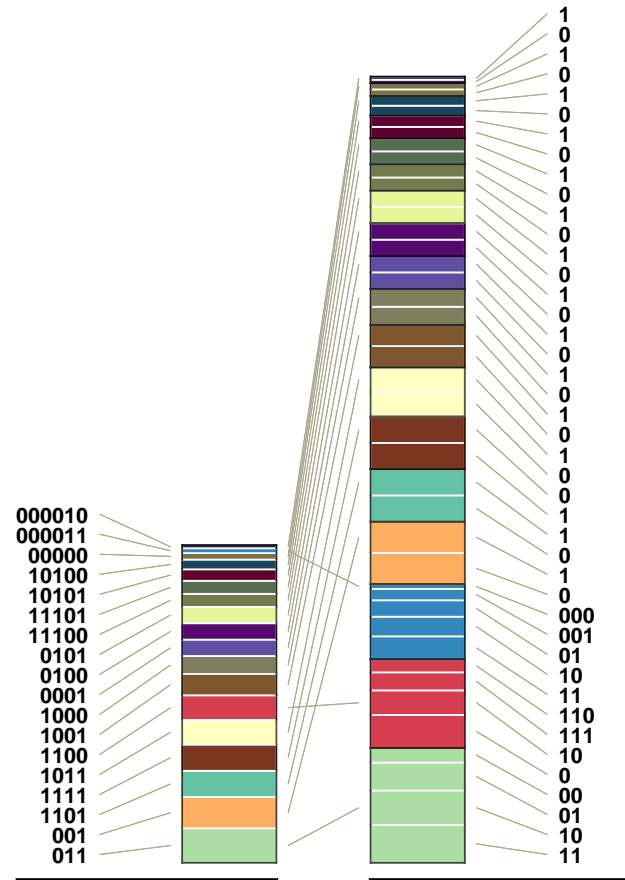

$$L(M) = 2.72 + 2.30 = 5.03 \text{ bits}$$

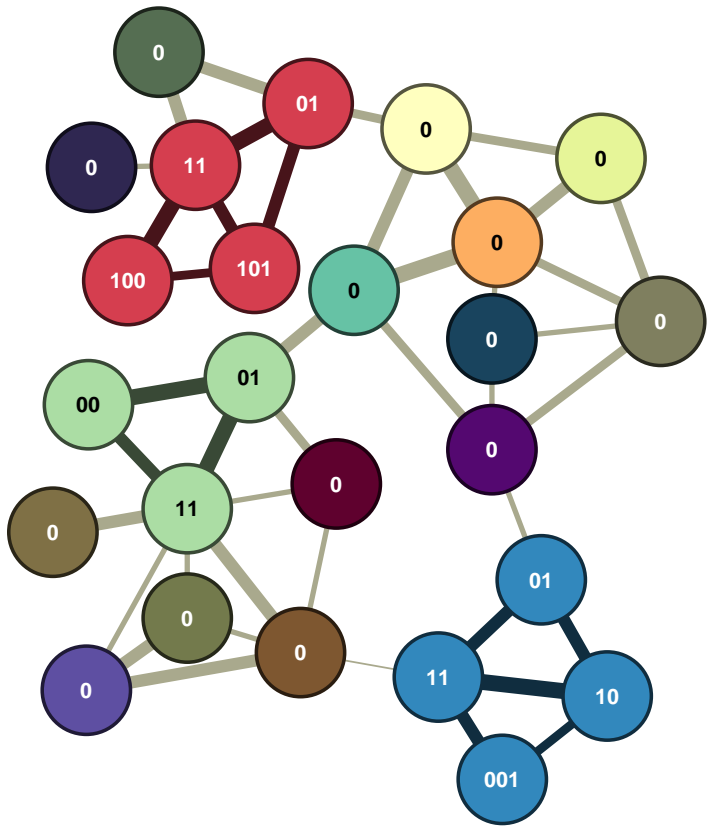

2.0 —

1.5 —

1.0 —

0.5 —

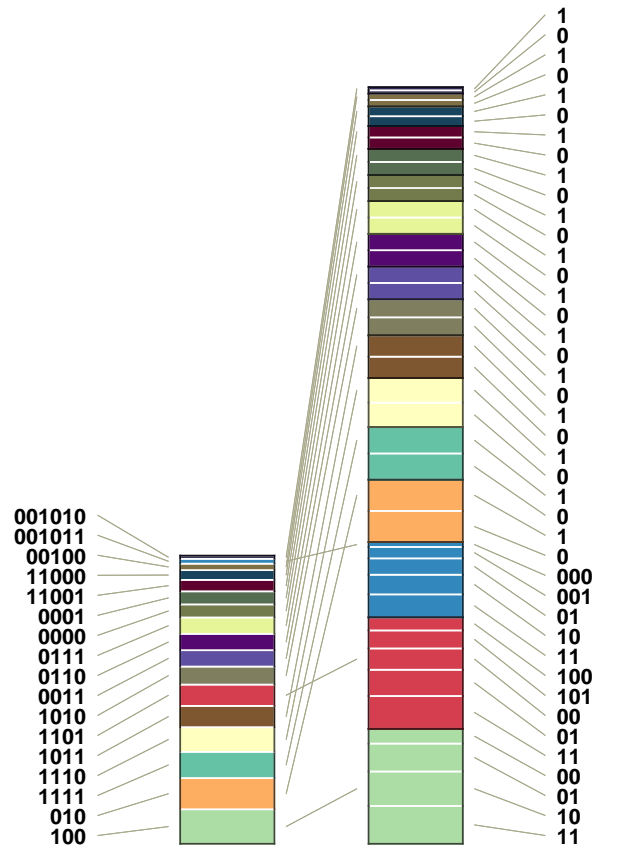

$L(M) = 2.42 + 2.36 = 4.78 \text{ bits}$

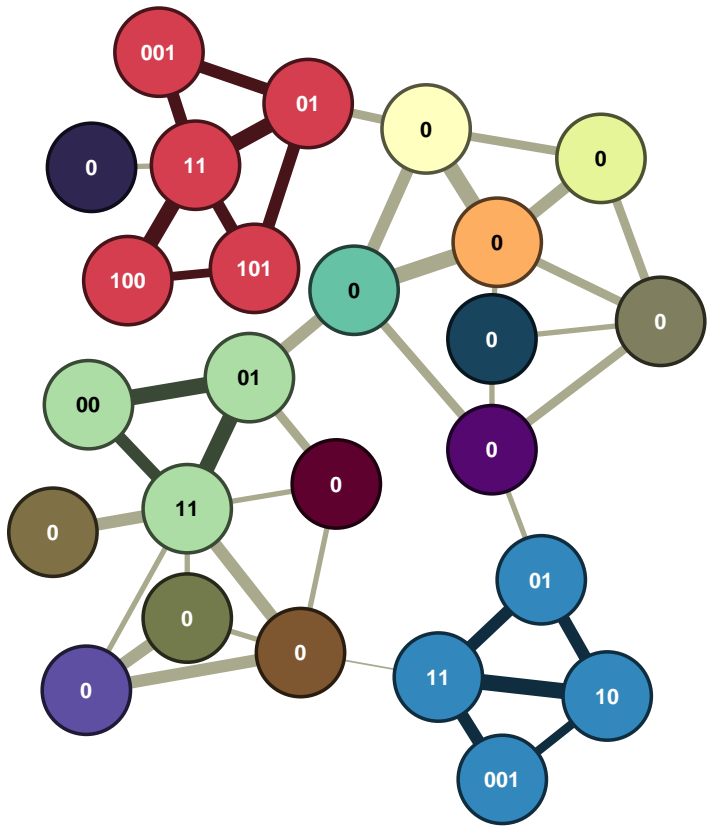

2.0 —

1.5 —

1.0 —

0.5 —

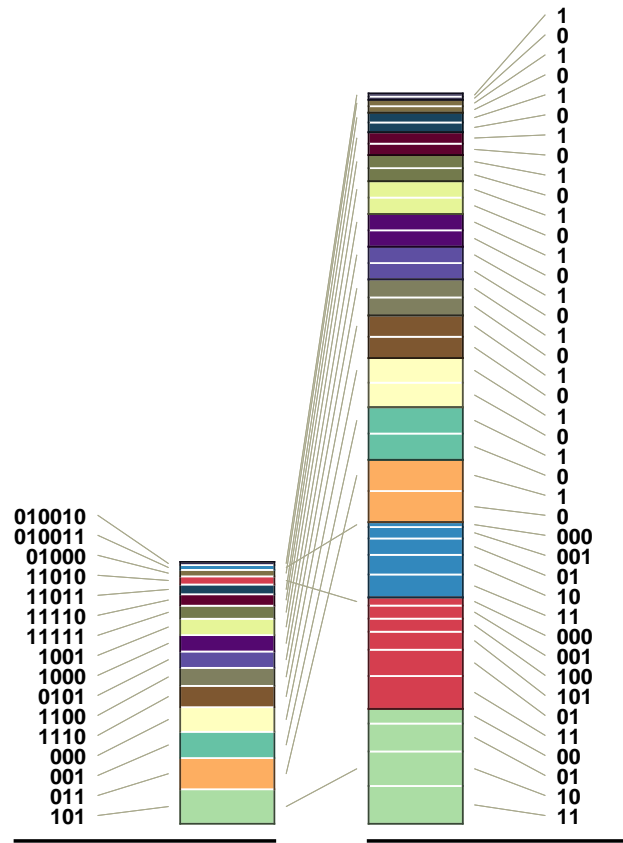

$$L(M) = 2.13 + 2.35 = 4.48 \text{ bits}$$

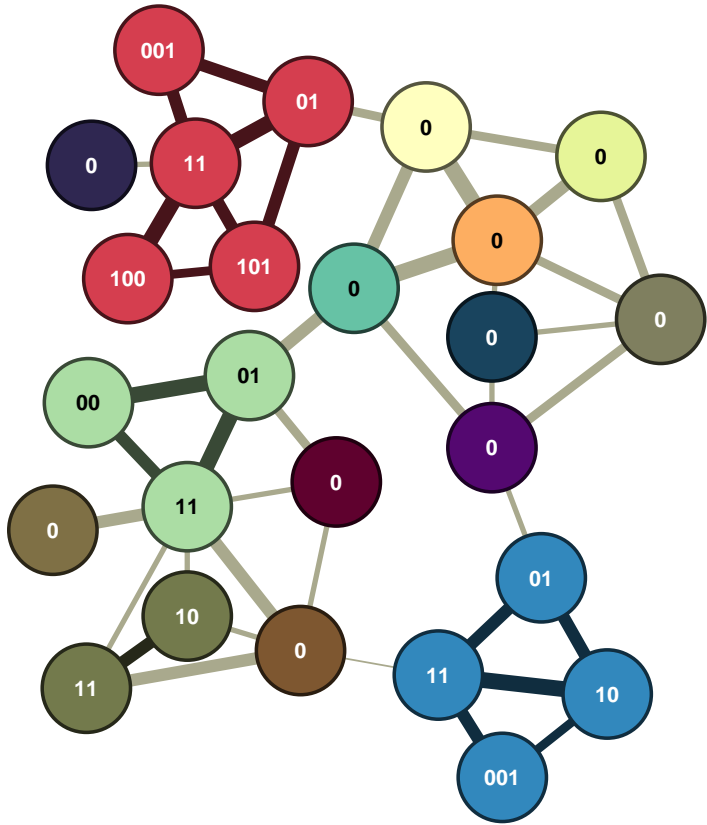

2.0 —

1.5 —

1.0 —

0.5 —

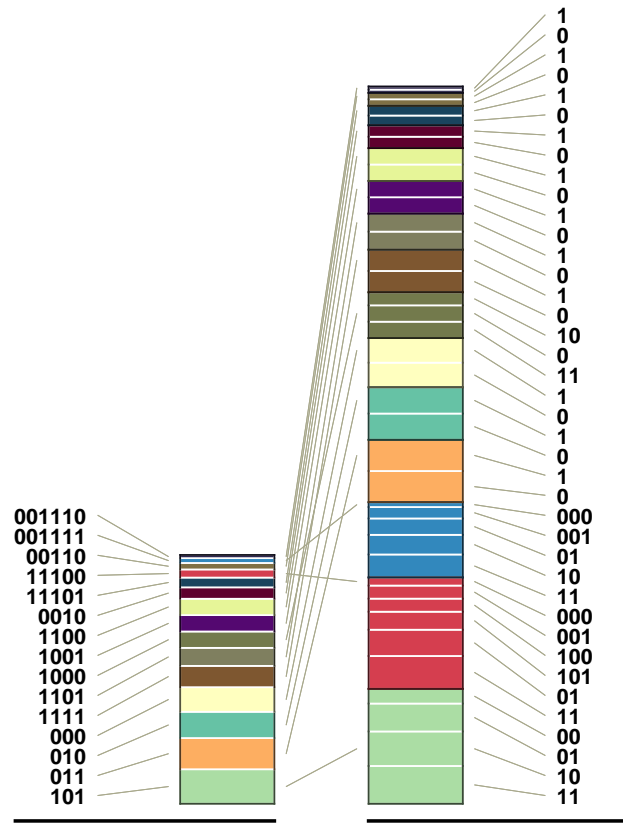

$$L(M) = 1.97 + 2.38 = 4.35 \text{ bits}$$

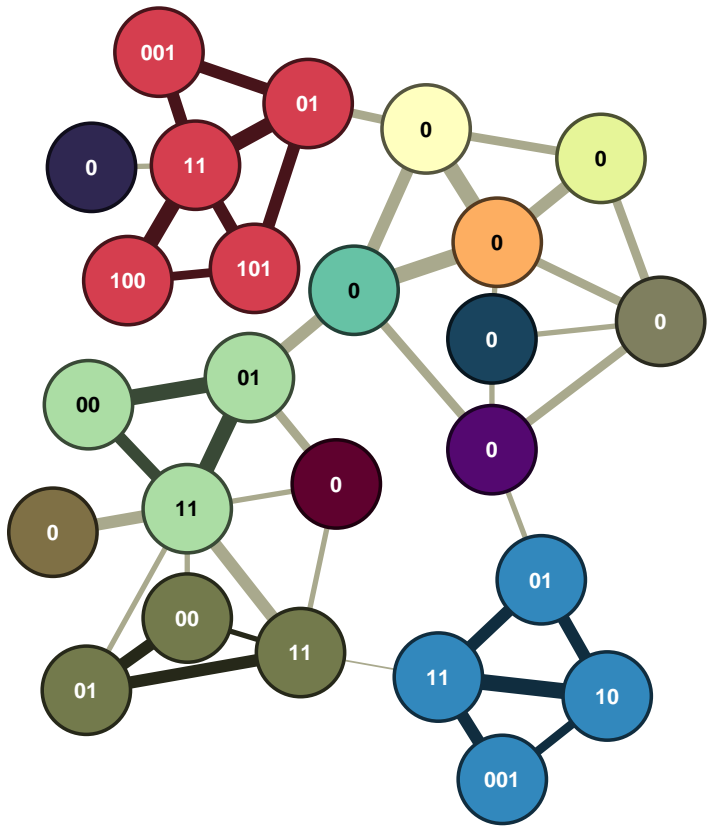

2.0 —

1.5 —

1.0 —

0.5 —

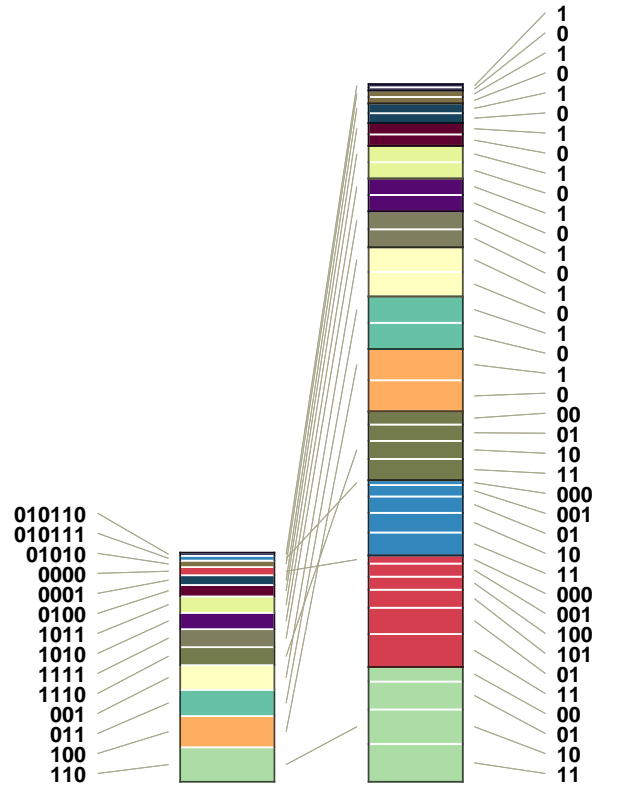

$$L(M) = 1.76 + 2.43 = 4.19 \text{ bits}$$

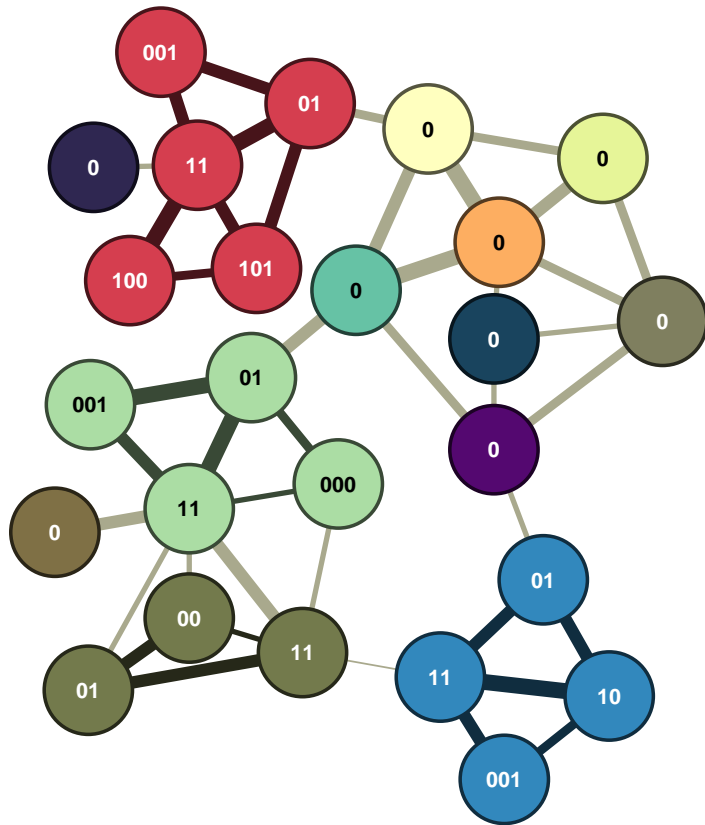

2.0 —

1.5 —

1.0 —

0.5 —

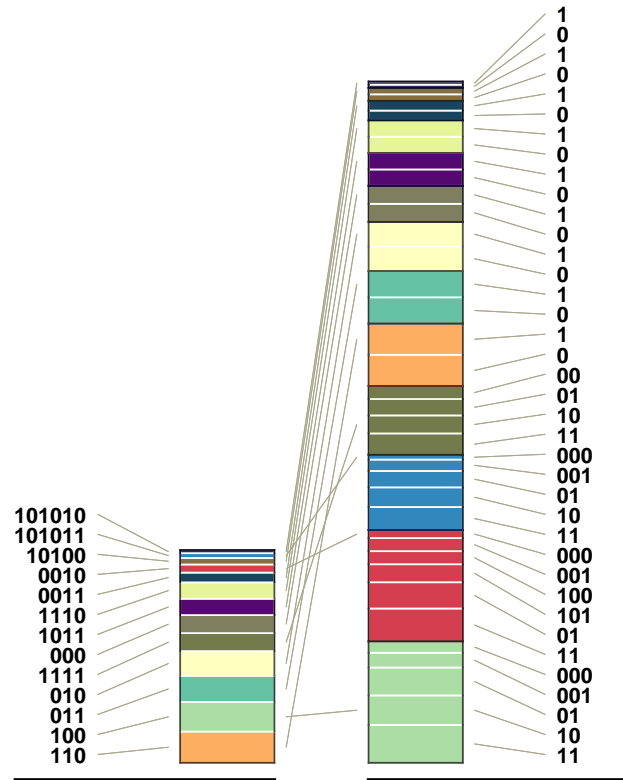

$$L(M) = 1.59 + 2.46 = 4.05 \text{ bits}$$



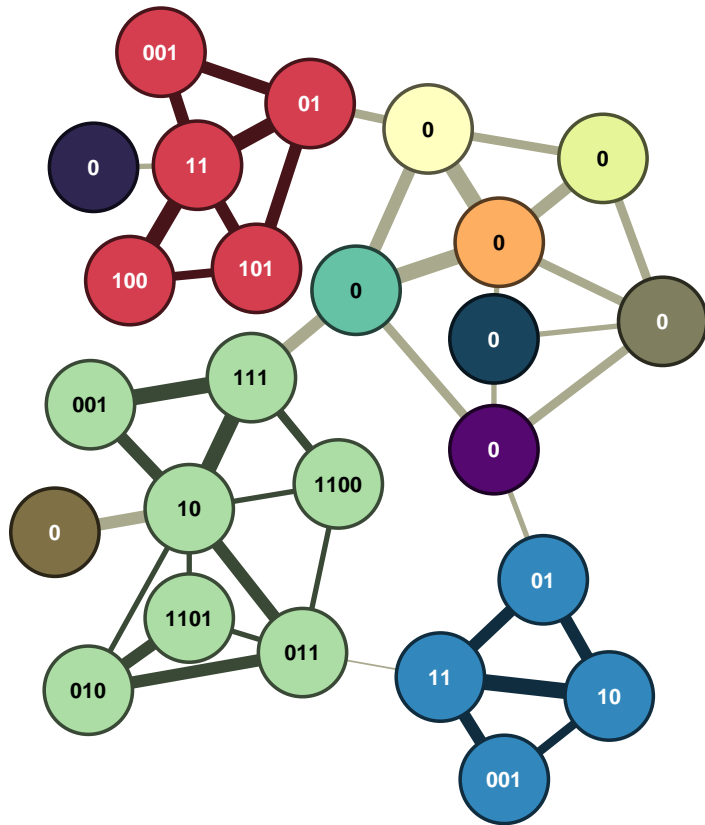

2.0 —

1.5 —

1.0 —

0.5 —

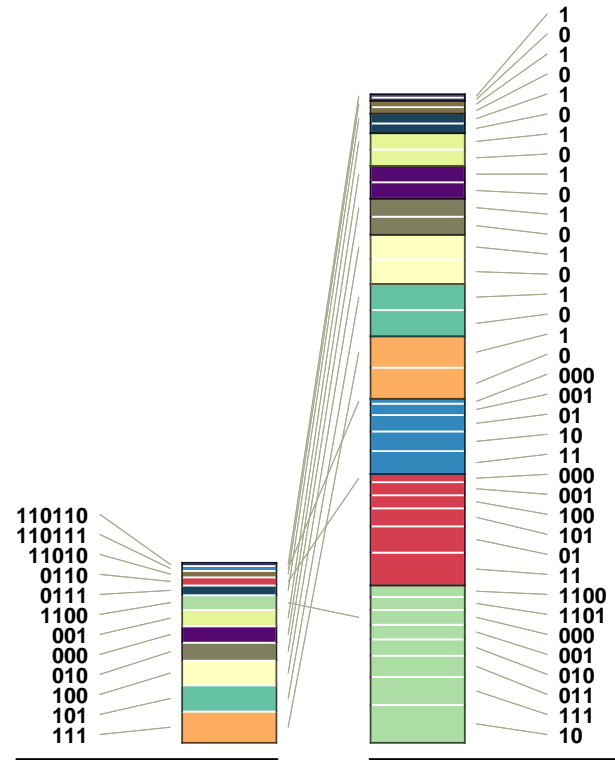

$$L(M) = 1.30 + 2.57 = 3.88 \text{ bits}$$

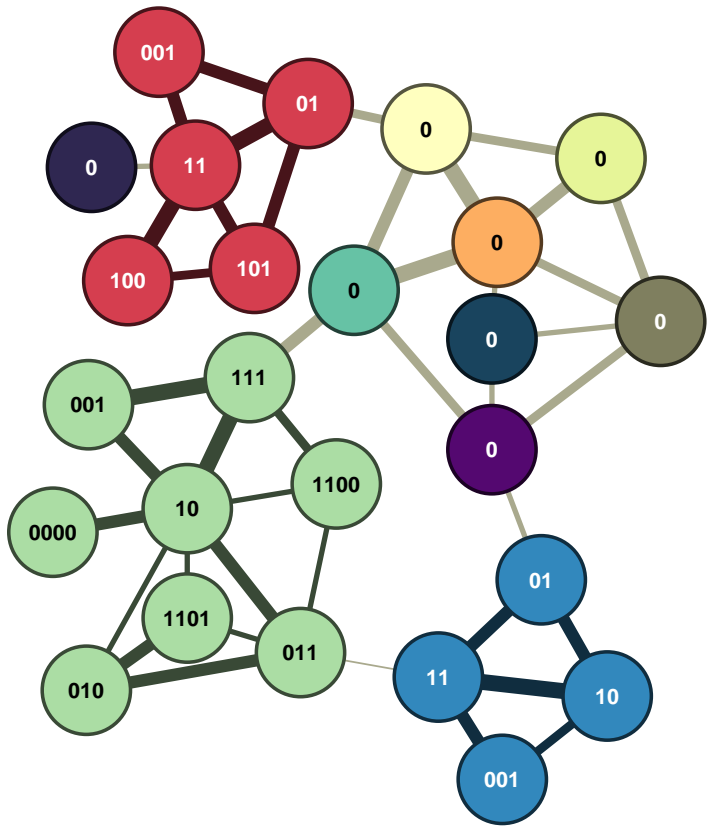

2.0 —

1.5 —

1.0 —

0.5 —

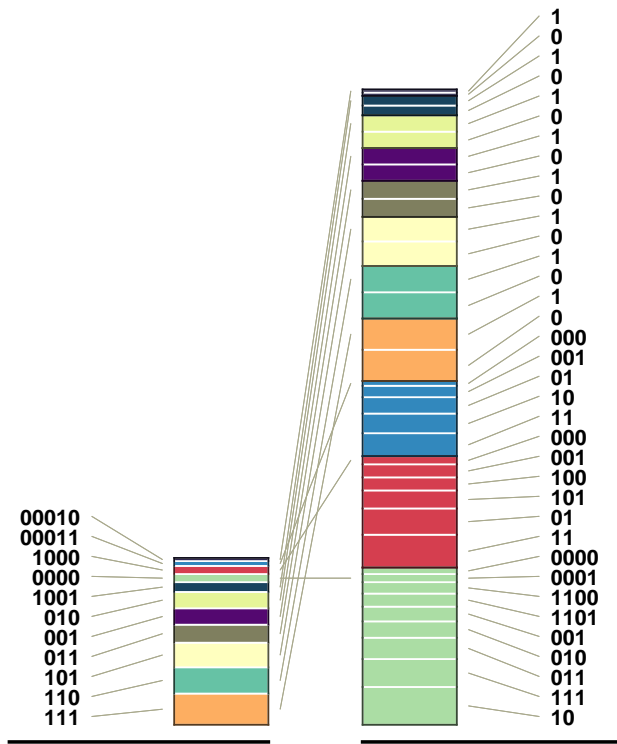

$$L(M) = 1.16 + 2.58 = 3.74 \text{ bits}$$

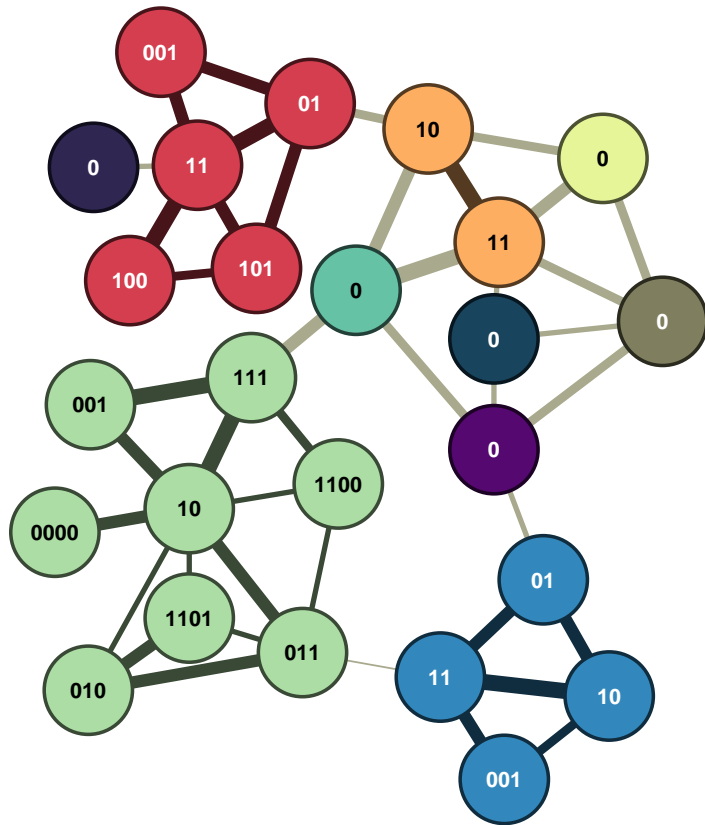

2.0 —

1.5 —

1.0 —

0.5 —

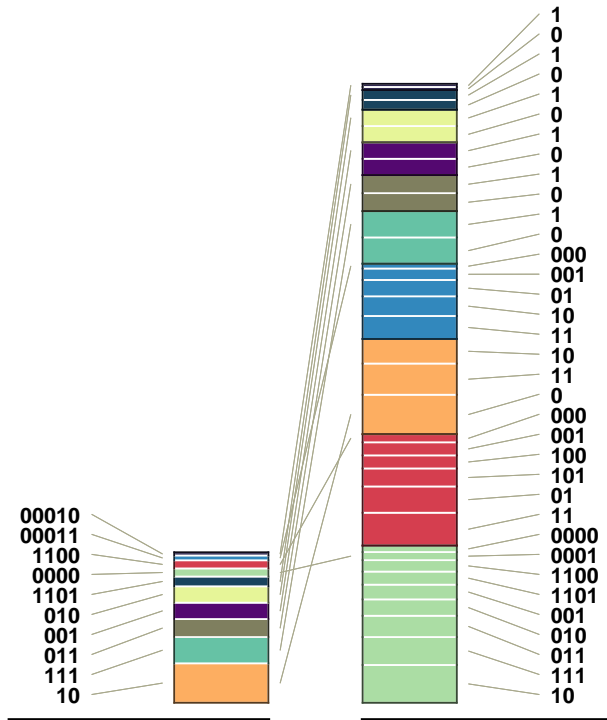

$$L(M) = 0.97 + 2.66 = 3.63 \text{ bits}$$

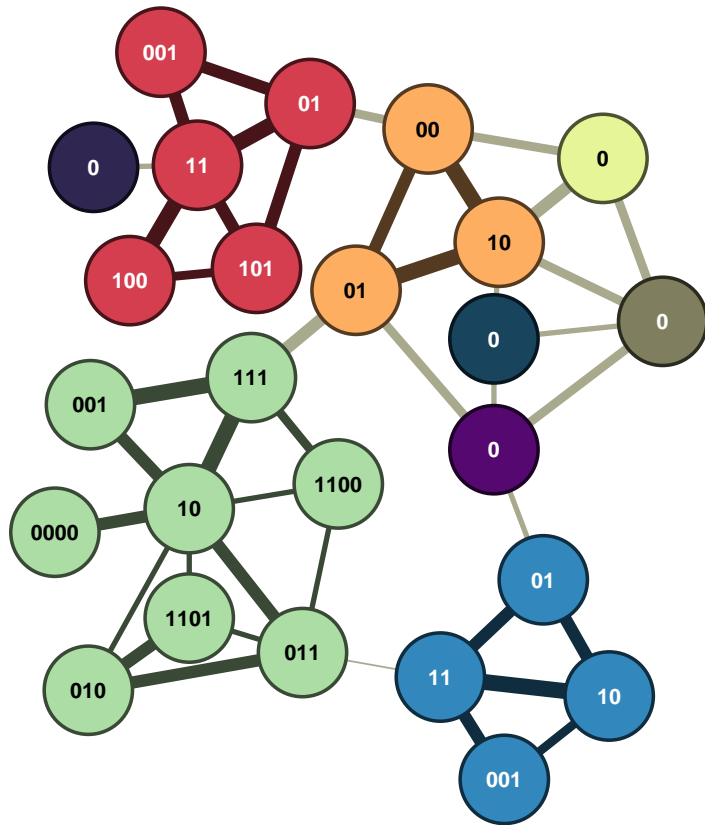

2.0 —

1.5 —

1.0 —

0.5 —

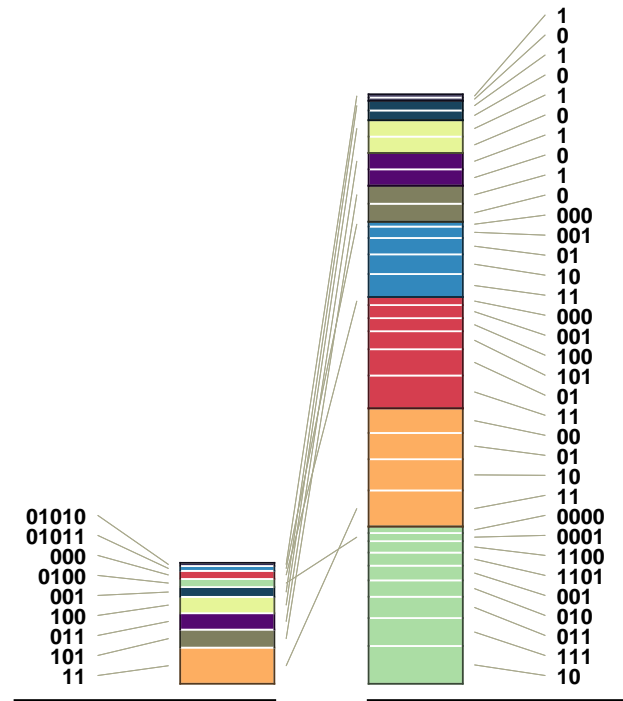

$$L(M) = 0.75 + 2.73 = 3.48 \text{ bits}$$

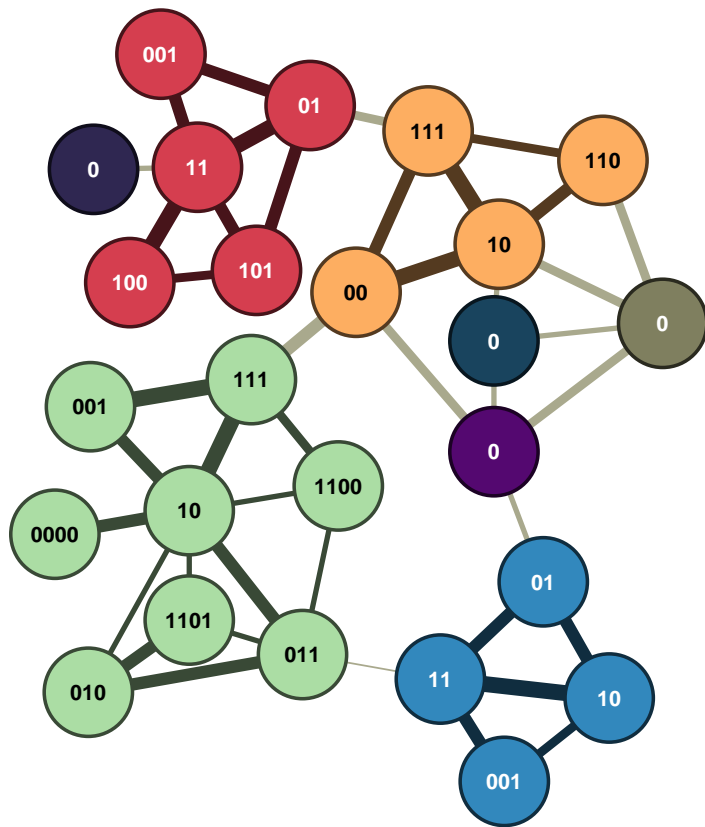

2.0 —

1.5 —

1.0 —

0.5 —

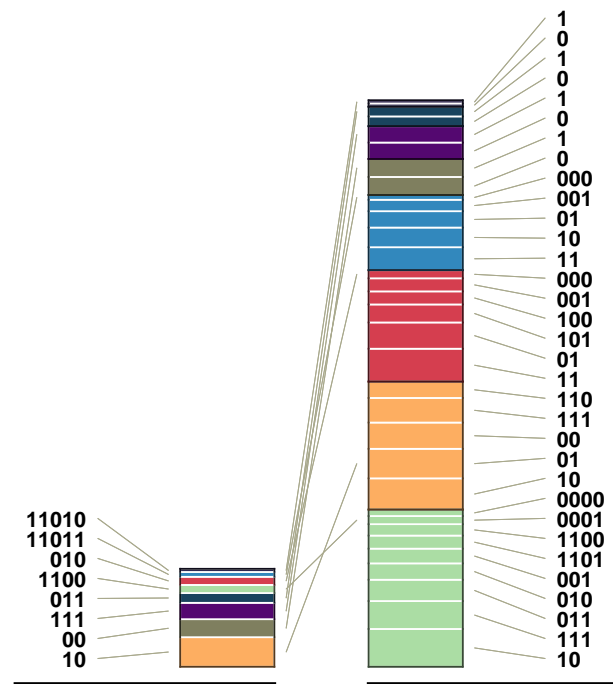

$$L(M) = 0.58 + 2.79 = 3.37 \text{ bits}$$

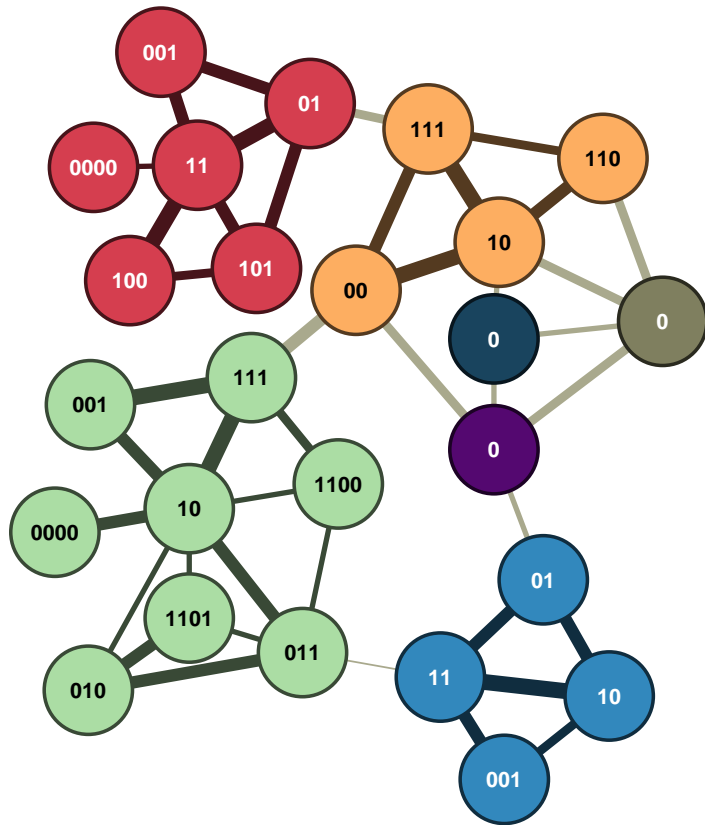

2.0 —

1.5 —

1.0 —

0.5 —

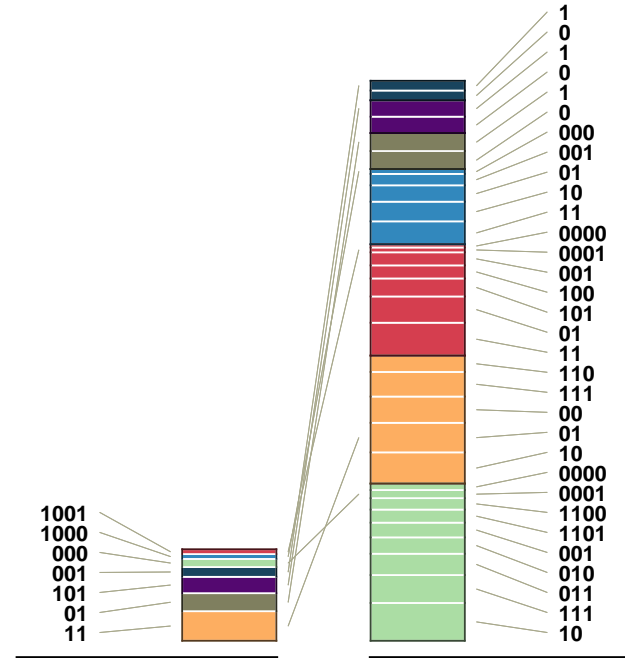

$$L(M) = 0.51 + 2.79 = 3.30 \text{ bits}$$

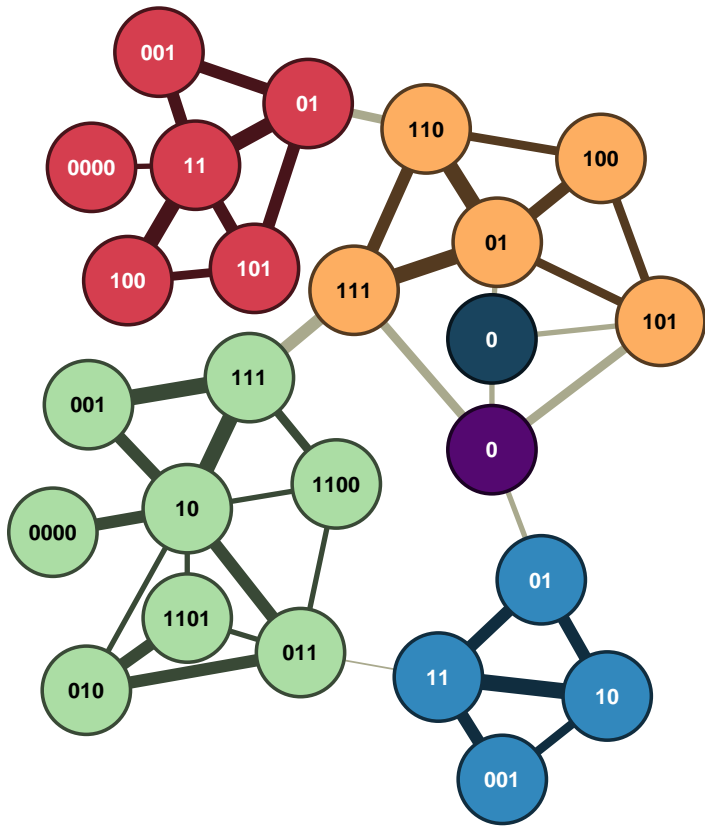

2.0 —

1.5 —

1.0 —

0.5 —

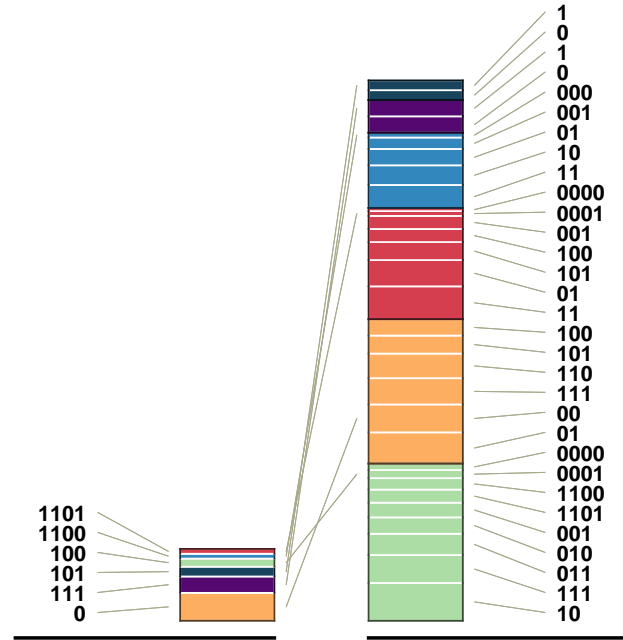

$$L(M) = 0.36 + 2.88 = 3.24 \text{ bits}$$

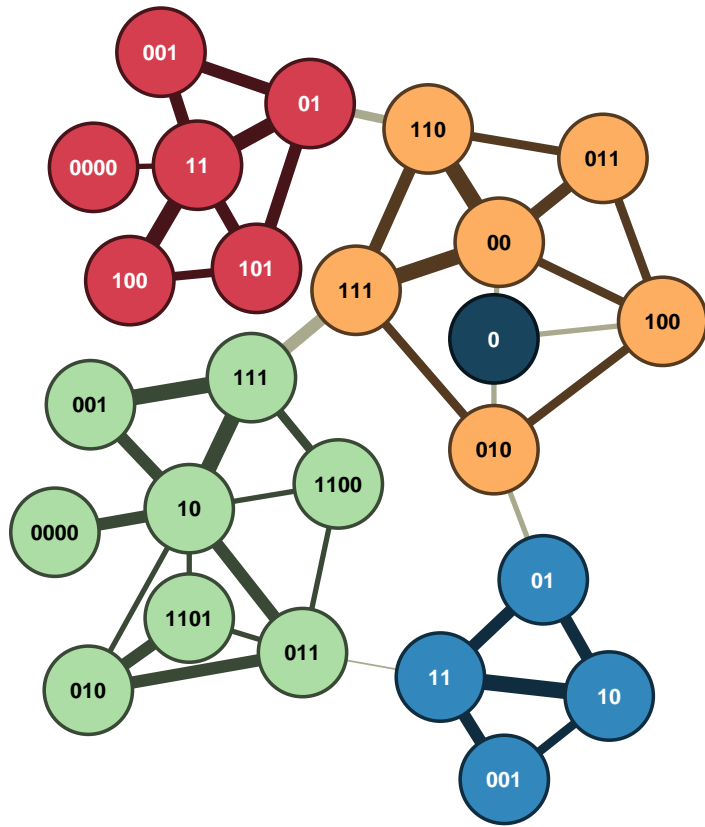

2.0 —

1.5 —

1.0 —

0.5 —

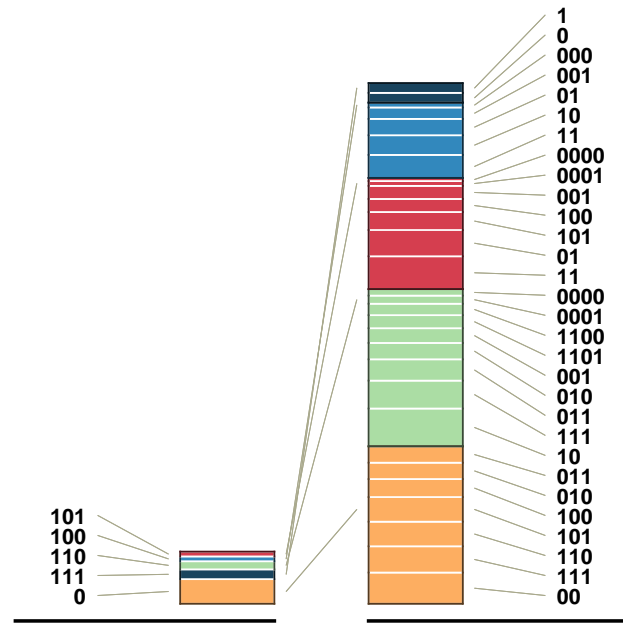

$$L(M) = 0.23 + 2.95 = 3.19 \text{ bits}$$



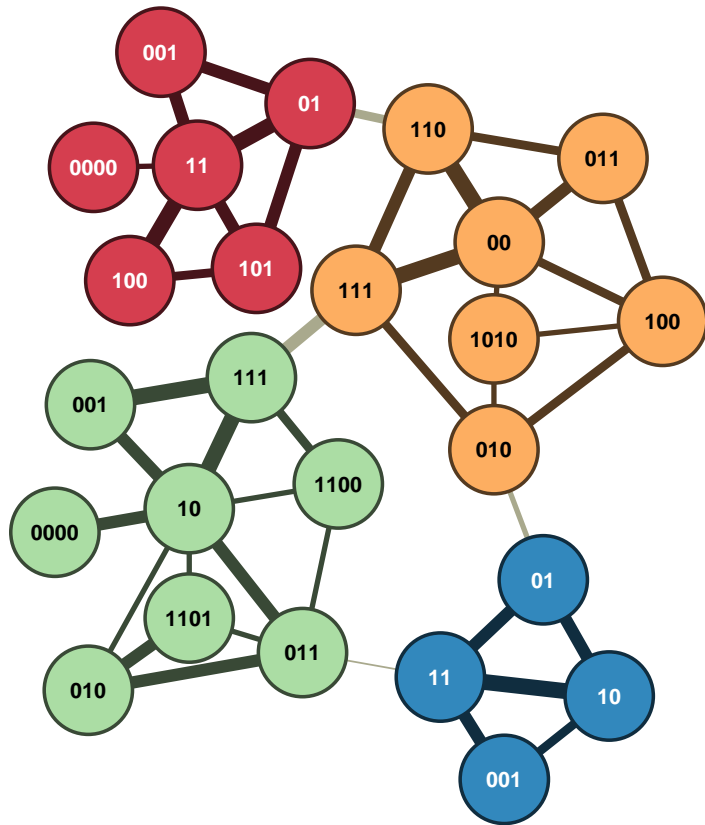

2.0 —

1.5 —

1.0 —

0.5 —

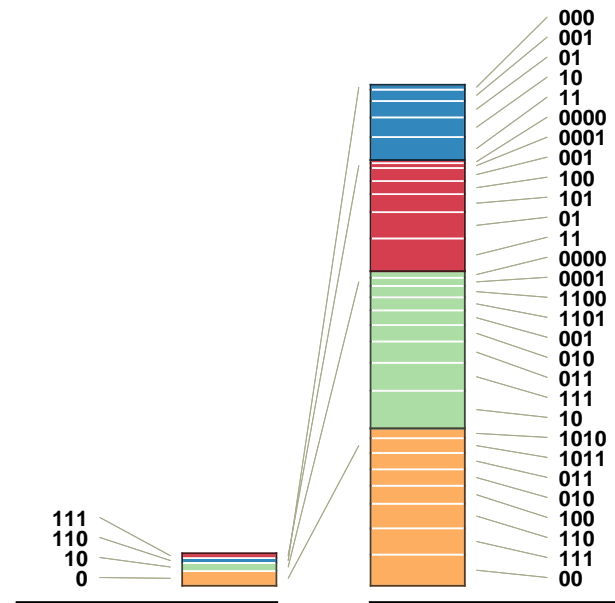

$$L(M) = 0.13 + 2.97 = 3.09 \text{ bits}$$



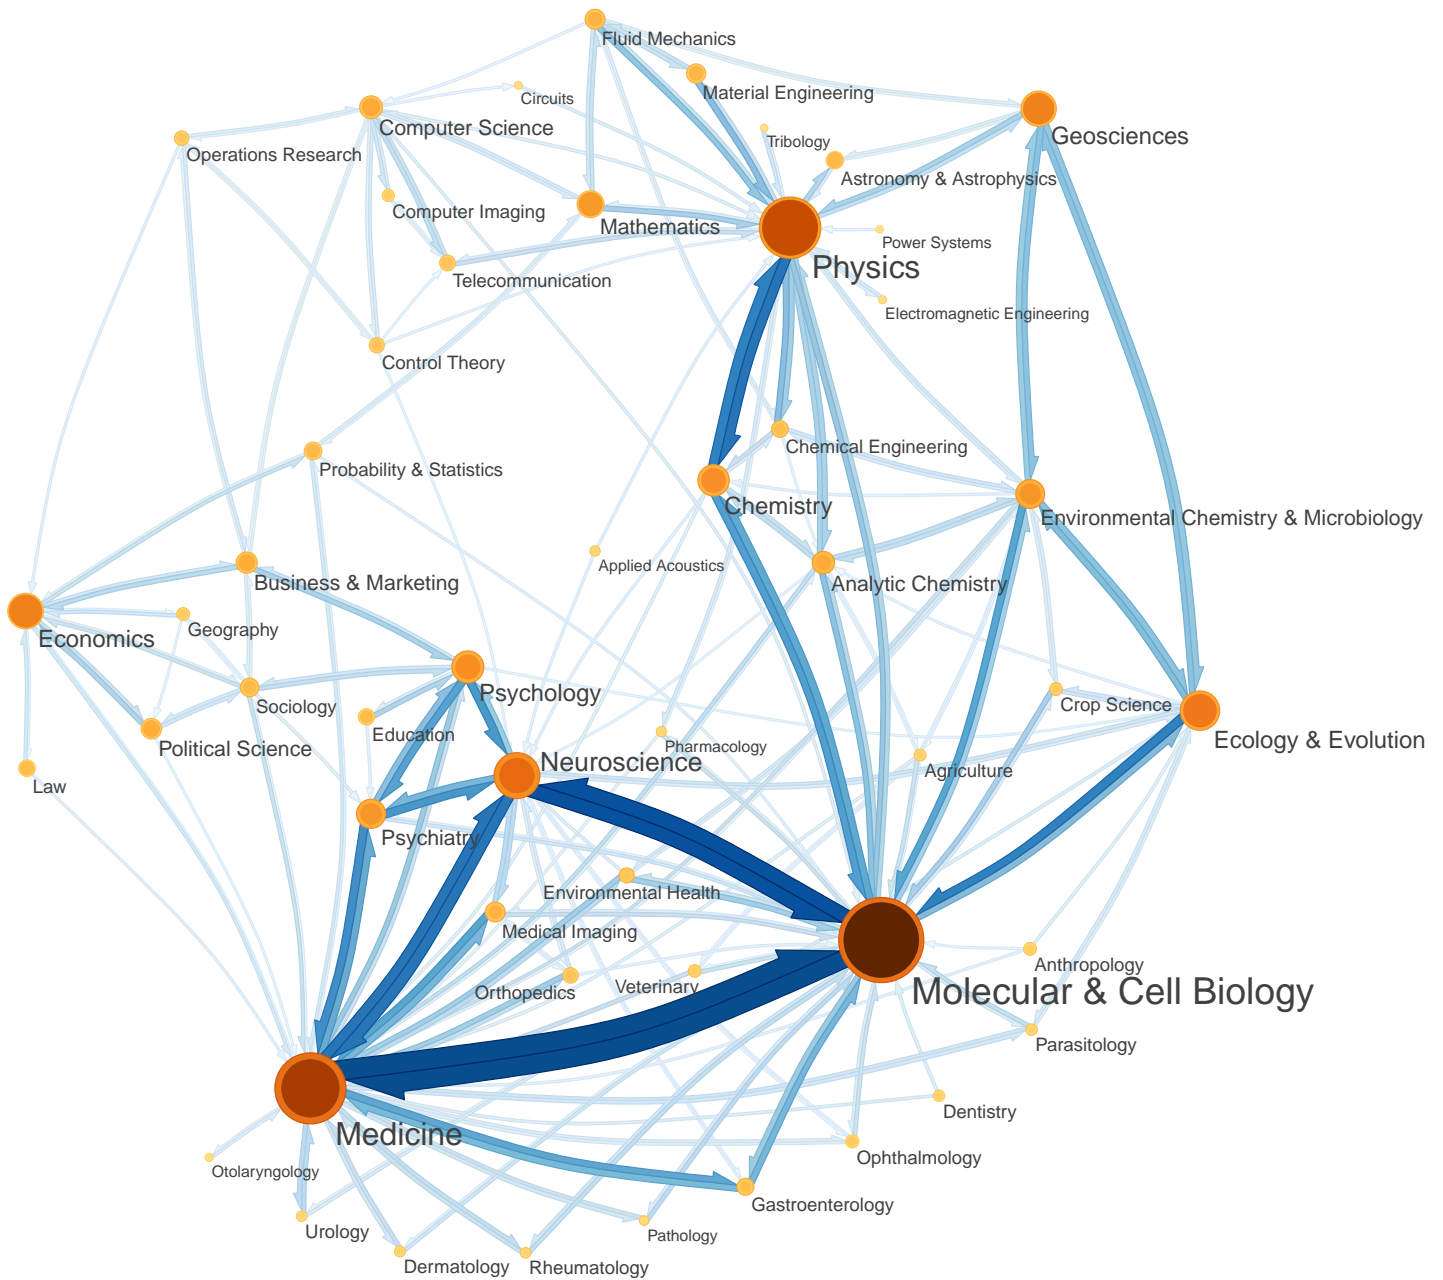

Fig. 6 A map of science with fields according to a partitioning with the presented method. All 88 field names in this caption and the 51 field names in the map are clickable links to lists with the journals in the corresponding fields. The fields and journals are ranked by the fraction of time they are visited by a random surfer. 1 Molecular & Cell Biology, 2 Medicine, 3 Physics, 4 Neuroscience, 5 Ecology & Evolution, 6 Economics, 7 Geosciences, 8 Psychology, 9 Chemistry, 10 Psychiatry, 11 Environmental Chemistry & Microbiology, 12 Mathematics, 13 Computer Science, 14 Analytic Chemistry, 15 Business & Marketing, 16 Political Science, 17 Fluid Mechanics, 18 Medical Imaging, 19 Material Engineering, 20 Sociology, 21 Probability & Statistics, 22 Astronomy & Astrophysics, 23 Gastroenterology, 24 Law, 25 Chemical Engineering, 26 Education, 27 Telecommunication, 28 Orthopedics, 29 Control Theory, 30 Environmental Health, 31 Operations Research, 32 Ophthalmology, 33 Crop Science, 34 Geography, 35 Anthropology, 36 Veterinary, 37 Computer Imaging, 38 Agriculture, 39 Parasitology, 40 Dentistry, 41 Dermatology, 42 Urology, 43 Rheumatology, 44 Applied Acoustics, 45 Pharmacology, 46 Pathology, 47 History & Philosophy of Science, 48 Otolaryngology, 49 Electromagnetic Engineering, 50 Information Science, 51 Circuits, 52 Media & Communication, 53 Power Systems, 54 Tribology, 55 History, 56 Geotechnology, 57 Wood Products, 58 Radiation, 59 Linguistics, 60 Social Work, 61 Psychoanalysis, 62 Middle Eastern Studies, 63 Forensic Science, 64 Transfusion, 65 Mycology, 66 Nuclear Energy, 67 offshore Engineering, 68 Environmental Ethics, 69 Insect Taxonomy, 70 Higher Education, 71 Refineries, 72 Reliability Engineering, 73 Other, 74 Civil Engineering, 75 Lab Veterinary, 76 Music, 77 Tourism, 78 Textiles, 79 Creativity Research, 80 Travel Sociology, 81 Medical Informatics, 82 Leprosy, 83 Sociology (Russian), 84 Cryobiology, 85 Death Studies, 86 Rehabilitation Counseling, 87 Steel, 88 Futurist.

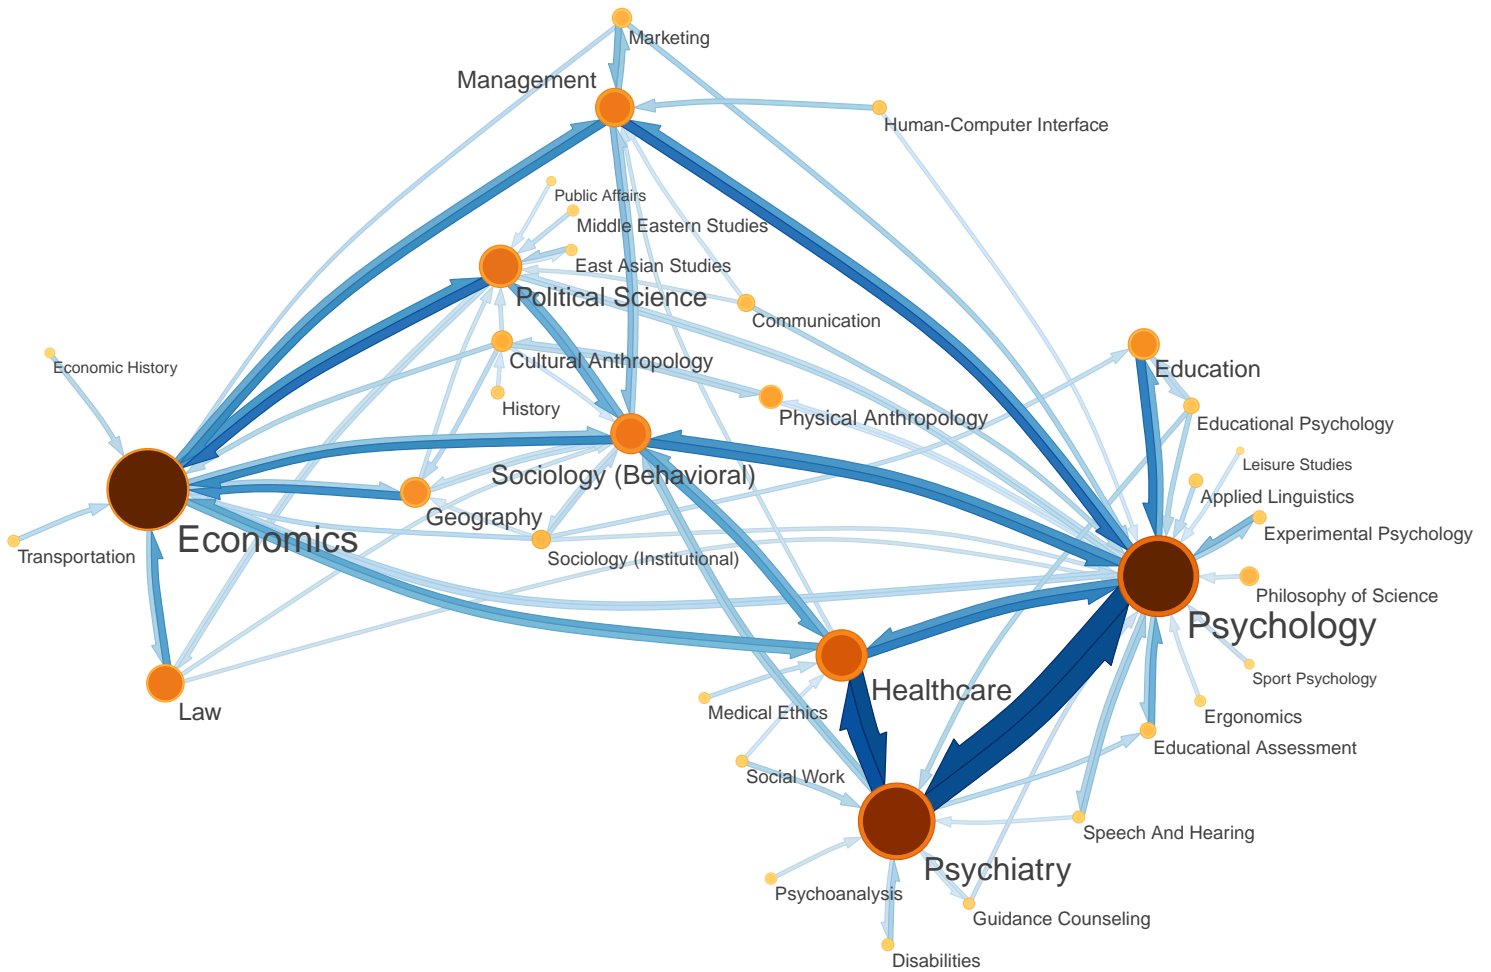

Fig. 7 A map of social science with fields according to a partitioning with the presented method. All 54 field names in this caption and the 36 field names in the map are clickable links to lists with the journals in the corresponding fields. The fields and journals are ranked by the fraction of time they are visited by a random surfer. 1 Economics, 2 Psychology, 3 Psychiatry, 4 Healthcare, 5 Political Science, 6 Sociology (Behavioral), 7 Management, 8 Law, 9 Education, 10 Geography, 11 Physical Anthropology, 12 Cultural Anthropology, 13 Marketing, 14 Information Science, 15 Philosophy of Science, 16 Sociology (Institutional), 17 Communication, 18 Educational Assessment, 19 Educational Psychology, 20 Human-Computer Interface, 21 Applied Linguistics, 22 Experimental Psychology, 23 History, 24 Social Work, 25 Speech And Hearing, 26 Disabilities, 27 Transportation, 28 Psychoanalysis, 29 Guidance Counseling, 30 Middle Eastern Studies, 31 East Asian Studies, 32 Ergonomics, 33 Medical Ethics, 34 Public Administration, 35 Ethics, 36 Economic History, 37 Sport Psychology, 38 Public Affairs, 39 Social Policy, 40 Family Relations, 41 Law And Behavior, 42 Criminology, 43 Sexuality, 44 Higher Education, 45 Leisure Studies, 46 Neurorehabilitation, 47 Pacific Studies, 48 Tourism, 49 Creativity, 50 Death And Dying, 51 Sociology (French), 52 Sociology (Eastern Europe), 53 Maritime Law, 54 Hypnosis

## Fields of science

### 1 Molecular & Cell Biology (20%)

1 J Biol Chem, 2 Cell, 3 J Immunol, 4 Embo J, 5 Blood, 6 Mol Cell Biol, 7 Cancer Res, 8 Nat Genet, 9 J Cell Biol, 10 Gene Dev, 11 Biochemistry-US, 12 Mol Cell, 13 J Exp Med, 14 Nucleic Acids Res, 15 Oncogene, 16 J Clin Invest, 17 Biochem Bioph Res Co, 18 Curr Biol, 19 J Mol Biol, 20 J Virol, 21 Nat Med, 22 Development, 23 Febs Lett, 24 Nat Cell Biol, 25 Am J Hum Genet, 26 J Cell Sci, 27 Biochem J, 28 Mol Biol Cell, 29 J Bacteriol, 30 Infect Immun, 31 Hum Mol Genet, 32 Nat Immunol, 33 Immunity, 34 Genetics, 35 Plant Physiol, 36 Mol Microbiol, 37 Am J Pathol, 38 Faseb J, 39 Clin Cancer Res, 40 Biophys J, 41 Endocrinology, 42 Nat Biotechnol, 43 Genome Res, 44 Dev Biol, 45 Plant Cell, 46 Nat Rev Mol Cell Bio, 47 Int J Cancer, 48 Bioinformatics, 49 Eur J Biochem, 50 Brit J Cancer, 51 Curr Opin Cell Biol, 52 Eur J Immunol, 53 Plant J, 54 Trends Biochem Sci, 55 Mol Biol Evol, 56 Annu Rev Immunol, 57 Dev Cell, 58 Gene, 59 Free Radical Bio Med, 60 Trends Cell Biol, 61 Trends Genet, 62 Exp Cell Res, 63 Virology, 64 Mol Pharmacol, 65 Brit J Haematol, 66 Nat Rev Genet, 67 Annu Rev Biochem, 68 Physiol Rev, 69 Curr Opin Genet Dev, 70 Am J Physiol-Cell Ph, 71 Biol Reprod, 72 Bioessays, 73 Mech Develop, 74 Vaccine, 75 Biochem Pharmacol, 76 Embo Rep, 77 Arch Biochem Biophys, 78 J Invest Dermatol, 79 Fems Microbiol Lett, 80 Protein Sci, 81 Mol Endocrinol, 82 Carcinogenesis, 83 Curr Opin Immunol, 84 Anal Biochem, 85 Method Enzymol, 86 Genomics, 87 Structure, 88 J Gen Virol, 89 J Leukocyte Biol, 90 Immunol Rev, 91 Proteins, 92 Am J Physiol-Lung C, 93 Leukemia, 94 Cell Mol Life Sci, 95 Rna, 96 Curr Opin Struc Biol, 97 Annu Rev Cell Dev Bi, 98 Plant Mol Biol, 99 J Pathol, 100 Trends Plant Sci, 101 Microbiol-Sgm, 102 Acta Crystallogr D, 103 Cell Death Differ, 104 J Lipid Res, 105 Am J Resp Cell Mol, 106 Cancer Cell, 107 Am J Physiol-Renal, 108 Gene Ther, 109 J Exp Bot, 110 J Cell Physiol, 111 Endocr Rev, 112 J Cell Biochem, 113 Planta, 114 Anticancer Res, 115 Hum Genet, 116 J Med Genet, 117 Biotechniques, 118 Cancer Lett, 119 Curr Opin Plant Biol, 120 Curr Opin Microbiol, 121 Lab Invest, 122 Microbiol Mol Biol R, 123 Trends Immunol, 124 J Mol Evol, 125 Hum Mutat, 126 Bba-Biomembranes, 127 Clin Exp Immunol, 128 Int Immunol, 129 Mol Cell Endocrinol, 130 Trends Microbiol, 131 J Endocrinol, 132 Bone Marrow Transpl, 133 Dev Dynam, 134 Hum Gene Ther, 135 Annu Rev Physiol, 136 Traffic, 137 Microbes Infect, 138 Chem Biol, 139 J Immunol Methods, 140 Methods, 141 Mol Plant Microbe In, 142 Annu Rev Genet, 143 Int J Oncol, 144 Exp Hematol, 145 Mol Ther, 146 J Biochem, 147 Annu Rev Plant Biol, 148 Plant Cell Physiol, 149 Bba-Mol Cell Biol L, 150 Immunology, 151 J Gen Physiol, 152 Front Biosci, 153 Biochem Soc T, 154 Annu Rev Microbiol, 155 Annu Rev Pharmacol, 156 Bba-Bioenergetics, 157 Curr Opin Biotech, 158 Adv Exp Med Biol, 159 Biol Chem, 160 Int J Biochem Cell B, 161 Eur J Hum Genet, 162 Mutat Res-Fund Mol M, 163 Mol Biochem Parasit, 164 Biopolymers, 165 Pflug Arch Eur J Phy, 166 J Struct Biol, 167 Gene Chromosome

Canc, 168 Mamm Genome, 169 Genes Cells, 170 Microsc Res Techniq, 171 Trends Endocrin Met, 172 Physiol Plantarum, 173 Biochimie, 174 Prostate, 175 Bba-Mol Cell Res, 176 Cell Signal, 177 Genet Epidemiol, 178 Bba-Gen Subjects, 179 Trends Biotechnol, 180 Pharmacol Therapeut, 181 Plant Sci, 182 J Histochem Cytochem, 183 Bba-Gene Struct Expr, 184 Curr Top Microbiol, 185 Mol Cell Biochem, 186 Proteomics, 187 Clin Immunol, 188 Arch Virol, 189 Cell Microbiol, 190 J Steroid Biochem, 191 Biosci Biotech Bioch, 192 Trends Mol Med, 193 Glycobiology, 194 Immunogenetics, 195 Haematologica, 196 Mol Hum Reprod, 197 Fems Microbiol Rev, 198 Mol Genet Metab, 199 J Mol Med-Jmm, 200 Free Radical Res, 201 Yeast, 202 Annu Rev Bioph Biom, 203 Cytokine, 204 Photochem Photobiol, 205 J Comput Biol, 206 Mol Reprod Dev, 207 Hum Immunol, 208 Genesis, 209 Semin Cancer Biol, 210 Semin Cell Dev Biol, 211 J Membrane Biol, 212 Int Rev Cytol, 213 Exp Gerontol, 214 Cell Calcium, 215 Leukemia Lymphoma, 216 Cytokine Growth F R, 217 Clin Genet, 218 Mol Genet Genomics, 219 Int Arch Allergy Imm, 220 Arch Microbiol, 221 Reproduction, 222 Mol Immunol, 223 Semin Immunol, 224 Curr Pharm Design, 225 Drug Discov Today, 226 J Interf Cytok Res, 227 Immunol Lett, 228 Mech Ageing Dev, 229 Biophys Chem, 230 Ann Hum Genet, 231 Toxicol, 232 Virus Res, 233 Physiol Genomics, 234 Cell Motil Cytoskel, 235 Biol Pharm Bull, 236 Protein Expres Purif, 237 Cell Immunol, 238 Scand J Immunol, 239 Cancer Chemoth Pharm, 240 Stem Cells, 241 Dev Genes Evol, 242 Cancer Genet Cytogen, 243 Matrix Biol, 244 J Plant Physiol, 245 Semin Hematol, 246 Tissue Antigens, 247 Placenta, 248 Genet Res, 249 Int J Mol Med, 250 Genes Immun, 251 Trends Cardiovas Med, 252 J Mol Endocrinol, 253 Mol Med, 254 Bba-Mol Basis Dis, 255 Cancer Gene Ther, 256 Hum Hered, 257 Eur J Cell Biol, 258 Fungal Genet Biol, 259 Am J Hematol, 260 Curr Genet, 261 Oncol Rep, 262 Res Microbiol, 263 J Androl, 264 Antioxid Redox Sign, 265 Int J Dev Biol, 266 Curr Opin Hematol, 267 Chromosoma, 268 Fems Immunol Med Mic, 269 Histochem Cell Biol, 270 Histol Histopathol, 271 Dev Comp Immunol, 272 Leukemia Res, 273 Plant Physiol Bioch, 274 J Photoch Photobio B, 275 J Autoimmun, 276 Photosynth Res, 277 Adv Immunol, 278 Differentiation, 279 Prog Nucleic Acid Re, 280 Blood Cell Mol Dis, 281 Cancer Immunol Immun, 282 Dna Res, 283 Annu Rev Genom Hum G, 284 Mol Carcinogen, 285 Steroids, 286 Int J Hematol, 287 Curr Opin Oncol, 288 J Bioenerg Biomembr, 289 Biol Blood Marrow Tr, 290 Adv Protein Chem, 291 Chromosome Res, 292 Neoplasia, 293 Crit Rev Oncol Hemat, 294 Dna Cell Biol, 295 Iubmb Life, 296 Bba-Rev Cancer, 297 Apmis, 298 Adv Cancer Res, 299 Apoptosis, 300 Immunol Cell Biol, 301 Pigm Cell Res, 302 J Cancer Res Clin, 303 J Mol Microb Biotech, 304 News Physiol Sci, 305 Exp Biol Med, 306 J Inherit Metab Dis, 307 Microbiol Immunol, 308 J Gene Med, 309 Endocr-Relat Cancer, 310 Cold Spring Harb Sym, 311 Clin Exp Metastas, 312 Prog Biophys Mol Bio, 313 Inflamm Res, 314 Chem Phys Lipids, 315 Prog Lipid Res, 316 Protoplasma, 317 Ann Hematol, 318 Eur J Haematol, 319 Evol Dev, 320 Int Immunopharmacol, 321 Anat Embryol, 322 Biochem Cell Biol, 323 Cell Mol Biol, 324 Anti-

Cancer Drug, 325 Curr Top Dev Biol, 326 Int J Med Microbiol, 327 Microvasc Res, 328 Mutat Res-Rev Mutat, 329 Mol Membr Biol, 330 Microb Pathogenesis, 331 Immunol Res, 332 Exp Dermatol, 333 Curr Opin Mol Ther, 334 Transgenic Res, 335 J Clin Immunol, 336 Biochemistry-Moscow+, 337 Method Cell Biol, 338 Prostag Oth Lipid M, 339 Recent Prog Horm Res, 340 Glycoconjugate J, 341 Biol Cell, 342 Nitric Oxide-Biol Ch, 343 J Muscle Res Cell M, 344 Cell Struct Funct, 345 Eur Biophys J Biophys, 346 Melanoma Res, 347 Cancer Metast Rev, 348 Cell Stress Chaperon, 349 Dev Growth Differ, 350 Crit Rev Plant Sci, 351 Cell Biol Int, 352 J Pept Res, 353 J Mammary Gland Biol, 354 Immunobiology, 355 Adv Virus Res, 356 Arch Dermatol Res, 357 Eur Cytokine Netw, 358 Rev Med Virol, 359 J Biomol Struct Dyn, 360 J Reprod Immunol, 361 Biofactors, 362 Biosystems, 363 Crit Rev Biochem Mol, 364 Cell Physiol Biochem, 365 J Dermatol Sci, 366 J Plant Growth Regul, 367 Mol Cells, 368 J Endotoxin Res, 369 Biometals, 370 Int J Androl, 371 Drug Resist Update, 372 J Biomed Sci, 373 Micron, 374 Sex Plant Reprod, 375 Crit Rev Immunol, 376 J Mol Recognit, 377 Mol Biotechnol, 378 Amino Acids, 379 Plasmid, 380 Acta Biochim Pol, 381 Vitam Horm, 382 J Mol Model, 383 Virus Genes, 384 Acta Haematol-Basel, 385 Expert Opin Biol Th, 386 Connect Tissue Res, 387 Autoimmunity, 388 J Biomol Screen, 389 Cells Tissues Organs, 390 J Mol Diagn, 391 Neuro-Oncology, 392 Viral Immunol, 393 Exp Mol Pathol, 394 Cell Biochem Biophys, 395 Biochem Soc Symp, 396 Biotechnol Appl Bioc, 397 Gene Expression, 398 Redox Rep, 399 In Vitro Cell Dev-An, 400 Blood Rev, 401 Exp Mol Med, 402 Genes Genet Syst, 403 Tissue Cell, 404 Drug Develop Res, 405 Biomol Eng, 406 Int J Exp Pathol, 407 Eur J Immunogenet, 408 J Pept Sci, 409 Genet Test, 410 Med Microbiol Immun, 411 Plant Mol Biol Rep, 412 Crit Rev Eukar Gene, 413 Exp Lung Res, 414 Zygote, 415 Scientist, 416 Amyloid, 417 Receptor Channel, 418 Cell Res, 419 Bioscience Rep, 420 Springer Semin Immun, 421 Neoplasma, 422 Endocr Res, 423 In Vivo, 424 Tumor Biol, 425 J Invest Derm Symp P, 426 Inflammation, 427 Biogerontology, 428 Oncol Res, 429 Biodrugs, 430 Cytotherapy, 431 Clin Lab Haematol, 432 Asm News, 433 Growth Factors, 434 J Med Primatol, 435 Pathobiology, 436 J Biosciences, 437 J Biol Phys, 438 Arch Histol Cytol, 439 Cell Proliferat, 440 Adv Bot Res, 441 J Biochem Mol Biol, 442 Mol Biol Rep, 443 Endothelium-J Endoth, 444 Cell Biochem Funct, 445 Mol Biol+, 446 Int J Biol Marker, 447 Dis Markers, 448 Mediat Inflamm, 449 Drug News Perspect, 450 J Biol Reg Homeos Ag, 451 Crit Rev Cl Lab Sci, 452 Anat Histol Embryol, 453 Acta Physiol Plant, 454 An Acad Bras Cienc, 455 Acta Virol, 456 Exp Anim Tokyo, 457 Ann Genet-Paris, 458 Russ J Plant Physl+, 459 Arch Immunol Ther Ex, 460 Dna Sequence, 461 Protein Peptide Lett, 462 Trends Glycosci Glyc, 463 Biofizika+, 464 Folia Histochem Cyto, 465 Cell Mol Biol Lett, 466 Clin Dysmorphol, 467 P Jpn Acad B-Phys, 468 Zh Obshch Biol, 469 Acta Histochem, 470 Eur J Histochem, 471 J Liposome Res, 472 Biol Res, 473 Anim Biotechnol, 474 Immunopharm Immunot, 475 Genet Counsel, 476 Gen Physiol Biophys, 477 Sci China Ser C, 478 Immunol Invest, 479 Hemoglobin,

480 Indian J Biochem Bio, 481 Hematol Oncol, 482 J Toxicol-Toxin Rev, 483 Lett Pept Sci, 484 Theor Biosci, 485 Biofutur, 486 Int J Immunopath Ph, 487 J Genet, 488 Biotech Histochem, 489 Folia Biol-Prague, 490 Minerva Biotechnol, 491 Korean J Genetic, 492 Riv Biol-Biol Forum, 493 Acta Biotheor, 494 Prep Biochem Biotech, 495 Biotechnol Genet Eng, 496 Issues Law Med, 497 Biomed Res-Tokyo, 498 Acta Histochem Cytoc, 499 Spectrosc-Int J, 500 Biocell, 501 Natl Acad Sci Lett, 502 M S-Med Sci, 503 Biol Membrany, 504 Pteridines, 505 Period Biol, 506 Prog Biochem Biophys, 507 Lymphology, 508 Gematol Transfuziol, 509 Nippon No-geik Kaishi, 510 J Exp Anim Sci, 511 Seikagaku, 512 J Clin Biochem Nutr

## 2 Medicine (14%)

1 New Engl J Med, 2 Lancet, 3 Circulation, 4 Jama-J Am Med Assoc, 5 Brit Med J, 6 J Clin Oncol, 7 J Am Coll Cardiol, 8 J Clin Endocr Metab, 9 Am J Resp Crit Care, 10 Circ Res, 11 Diabetes, 12 Ann Intern Med, 13 J Infect Dis, 14 Pediatrics, 15 J Clin Microbiol, 16 Cancer, 17 Arch Intern Med, 18 Clin Infect Dis, 19 Arterioscl Throm Vas, 20 Stroke, 21 J Natl Cancer I, 22 Aids, 23 Am J Cardiol, 24 Diabetes Care, 25 Kidney Int, 26 Am J Public Health, 27 Am J Epidemiol, 28 Chest, 29 Am J Physiol-Heart C, 30 Antimicrob Agents Ch, 31 Hypertension, 32 Am J Clin Nutr, 33 J Nutr, 34 Ann Thorac Surg, 35 Transplantation, 36 J Am Soc Nephrol, 37 J Allergy Clin Immun, 38 Soc Sci Med, 39 J Appl Physiol, 40 Crit Care Med, 41 J Bone Miner Res, 42 Am J Med, 43 Emerg Infect Dis, 44 Am J Obstet Gynecol, 45 Cardiovasc Res, 46 Ann Surg, 47 Hum Reprod, 48 Am J Physiol-Endoc M, 49 Am Heart J, 50 Thromb Haemostasis, 51 Diabetologia, 52 J Am Geriatr Soc, 53 Eur Respir J, 54 Am J Physiol-Reg I, 55 J Pediatr, 56 Health Affair, 57 Obstet Gynecol, 58 Am J Kidney Dis, 59 Anesthesiology, 60 J Thorac Cardiol Sur, 61 Clin Chem, 62 Atherosclerosis, 63 Eur Heart J, 64 Med Sci Sport Exer, 65 Jaids-J Acq Imm Def, 66 Med Care, 67 Fertil Steril, 68 Cancer Epidem Biomar, 69 Int J Obesity, 70 Thorax, 71 Eur J Cancer, 72 Anesth Analg, 73 J Hypertens, 74 J Vasc Surg, 75 Ann Oncol, 76 J Antimicrob Chemoth, 77 Nephrol Dial Transpl, 78 Brit J Surg, 79 Heart, 80 Int J Epidemiol, 81 Arch Pediat Adol Med, 82 Bone, 83 Arch Dis Child, 84 J Epidemiol Commun H, 85 Pediatr Infect Dis J, 86 Pediatr Res, 87 J Trauma, 88 Epidemiology, 89 Am J Prev Med, 90 Clin Exp Allergy, 91 Semin Oncol, 92 Can Med Assoc J, 93 J Mol Cell Cardiol, 94 Surgery, 95 Prev Med, 96 B World Health Organ, 97 Acad Med, 98 Arch Surg-Chicago, 99 J Gen Intern Med, 100 J Clin Epidemiol, 101 Eur J Cardio-Thorac, 102 Am J Surg, 103 Osteoporosis Int, 104 Clin Pharmacol Ther, 105 Intens Care Med, 106 Clin Microbiol Rev, 107 J Gerontol A-Biol, 108 Brit J Nutr, 109 Drugs, 110 Mayo Clin Proc, 111 Obes Res, 112 Surg Endosc, 113 Am J Hypertens, 114 Metabolism, 115 J Med Virol, 116 Dis Colon Rectum, 117 Ca-Cancer J Clin, 118 Clin Endocrinol, 119 Gynecol Oncol, 120 J Adolescent Health, 121 Allergy, 122 J Cardiovasc Electr, 123 Transplant P, 124 Med J Australia, 125 J Am Coll Surgeons, 126 Gerontologist, 127 Breast Cancer Res

Tr, 128 Ann Emerg Med, 129 Brit J Anaesth, 130 Eur J Endocrinol, 131 Ann Surg Oncol, 132 Health Serv Res, 133 Acta Paediatr, 134 J Pediatr Surg, 135 J Adv Nurs, 136 J Intern Med, 137 World J Surg, 138 Sex Transm Dis, 139 Pharmacogenetics, 140 Diabetic Med, 141 Aids Res Hum Retrov, 142 Eur J Clin Nutr, 143 J Surg Res, 144 Brit J Clin Pharmacol, 145 Clin Sci, 146 Lipids, 147 J Cardiovasc Pharm, 148 Clin Ther, 149 Cancer Cause Control, 150 Ann Pharmacother, 151 Calcified Tissue Int, 152 Shock, 153 Lung Cancer-J Iaslc, 154 J Heart Lung Transpl, 155 Eur J Appl Physiol, 156 Med Educ, 157 Eur J Clin Invest, 158 Clin Chim Acta, 159 Clin Diagn Lab Immun, 160 Epidemiol Infect, 161 Pharmacotherapy, 162 Eur J Vasc Endovasc, 163 Tob Control, 164 J Am Diet Assoc, 165 Catheter Cardio Inte, 166 Curr Opin Lipidol, 167 Infect Cont Hosp Ep, 168 J Fam Practice, 169 Ultrasound Obst Gyn, 170 Acad Emerg Med, 171 J Pain Symptom Manag, 172 Ann Allerg Asthma Im, 173 Brit J Gen Pract, 174 Int J Tuberc Lung D, 175 Thromb Res, 176 Clin Pharmacokinet, 177 Sex Transm Infect, 178 Acta Physiol Scand, 179 J Med Microbiol, 180 Eur J Clin Microbiol, 181 Nutrition, 182 Thyroid, 183 Am Surgeon, 184 Ann Behav Med, 185 Eur J Pediatr, 186 J Virol Methods, 187 Annu Rev Med, 188 Pace, 189 Prenatal Diag, 190 Int J Cardiol, 191 Ann Epidemiol, 192 Anaesthesia, 193 Ann Med, 194 Expert Opin Inv Drug, 195 Int J Antimicrob Ag, 196 J Am Soc Echocardiog, 197 Pediatr Pulm, 198 Acta Obstet Gyn Scan, 199 Int J Std Aids, 200 Cerebrovasc Dis, 201 J Clin Pharmacol, 202 Clin Exp Pharmacol P, 203 Sports Med, 204 Annu Rev Nutr, 205 Control Clin Trials, 206 Psycho-Oncol, 207 Resp Med, 208 Eur J Clin Pharmacol, 209 Oncologist, 210 Acta Anaesth Scand, 211 Pediatr Nephrol, 212 Eur J Obstet Gyn R B, 213 Drug Safety, 214 Public Health Rep, 215 Diagn Micr Infec Dis, 216 Nutr Cancer, 217 J Hosp Infect, 218 Clin Chem Lab Med, 219 J Hum Hypertens, 220 P Nutr Soc, 221 Clin Microbiol Infec, 222 Qjm-Int J Med, 223 J Endovasc Ther, 224 J Am Med Inform Assn, 225 Qual Life Res, 226 J Gastrointest Surg, 227 Hum Reprod Update, 228 Annu Rev Publ Health, 229 J Card Fail, 230 Horm Res, 231 Oncology-Basel, 232 Fam Pract, 233 Horm Metab Res, 234 Pharmacoconomics, 235 Am J Manag Care, 236 Nutr Rev, 237 Scand J Infect Dis, 238 Am Fam Physician, 239 Age Ageing, 240 Patient Educ Couns, 241 J Am Coll Nutr, 242 Am J Med Sci, 243 J Lab Clin Med, 244 Int J Sports Med, 245 Ther Drug Monit, 246 Res Q Exercise Sport, 247 Obes Surg, 248 South Med J, 249 J Clin Virol, 250 J Endocrinol Invest, 251 Can J Anaesth, 252 J Surg Oncol, 253 Milbank Q, 254 J Pediatr Endocr Met, 255 Curr Opin Nephrol Hy, 256 Eur J Heart Fail, 257 Med Care Res Rev, 258 Am J Infect Control, 259 Medicine, 260 J Pediatr Psychol, 261 Diabetes Res Clin Pr, 262 Public Health Nutr, 263 Med Decis Making, 264 Antivir Res, 265 Future Child, 266 Surg Clin N Am, 267 Am J Clin Oncol-Canc, 268 Am J Emerg Med, 269 J Dev Behav Pediatr, 270 Diabetes-Metab Res, 271 Aids Care, 272 Health Educ Res, 273 Semin Thromb Hemost, 274 Endocrin Metab Clin, 275 Int J Gynecol Obstet, 276 J Pediat Hematol Onc, 277 J Reprod Med, 278 Genet Med, 279 Contraception, 280 Health Policy, 281 Med Teach, 282 Aust Nz J Publ Heal, 283 Clin Nephrol, 284 Pediatr Clin N Am, 285 Exp Physiol, 286 Clin

Cardiol, 287 Blood Coagul Fibrin, 288 Health Policy Plann, 289 Ann Vasc Surg, 290 Eur J Epidemiol, 291 Clin Biochem, 292 Curr Opin Infect Dis, 293 Epidemiol Rev, 294 Maturitas, 295 J Infection, 296 Brit Med Bull, 297 Clin Transplant, 298 Paediatr Perinat Ep, 299 J Health Polit Polic, 300 Int J Clin Pract, 301 J Heart Valve Dis, 302 J Urban Health, 303 Int J Med Inform, 304 Med Hypotheses, 305 J Sport Sci, 306 Am J Health Promot, 307 Med Mycol, 308 Health Educ Behav, 309 Int J Health Serv, 310 Menopause, 311 Endocrine, 312 J School Health, 313 J Med Ethics, 314 Braz J Med Biol Res, 315 Resuscitation, 316 J Nutr Biochem, 317 Basic Res Cardiol, 318 J Paediatr Child H, 319 J Behav Med, 320 Prostag Leukotr Ess, 321 Cancer Invest, 322 Support Care Cancer, 323 Am J Health-Syst Ph, 324 Cell Transplant, 325 Pharmacoepidem Dr S, 326 Eur J Cancer Prev, 327 Artif Organs, 328 Pharmacol Res, 329 Aids Educ Prev, 330 Postgrad Med J, 331 Aviat Space Envir Md, 332 Curr Opin Clin Nutr, 333 Med Clin N Am, 334 Nurs Res, 335 Appetite, 336 J Law Med Ethics, 337 J Vasc Res, 338 J Emerg Med, 339 Drug Aging, 340 Hastings Cent Rep, 341 Hematol Oncol Clin N, 342 Curr Opin Cardiol, 343 J Cardiovasc Surg, 344 Exp Clin Endocr Diab, 345 Can J Cardiol, 346 Transplant Int, 347 Palliative Med, 348 Res Aging, 349 J Toxicol-Clin Toxic, 350 Haemophilia, 351 Res Nurs Health, 352 Semin Perinatol, 353 Qual Health Res, 354 Surg Today, 355 Early Hum Dev, 356 Infect Dis Clin N Am, 357 J Roy Soc Med, 358 Hypertens Res, 359 J Natl Med Assoc, 360 Clin Chest Med, 361 J Soc Gynecol Invest, 362 Diabetes Metab, 363 Region Anesth Pain M, 364 Method Inform Med, 365 Inquiry-J Health Car, 366 Curr Opin Pediatr, 367 J Nephrol, 368 J Cardiothor Vasc An, 369 Mol Cell Probe, 370 Cardiology, 371 Pediatr Cardiol, 372 Microb Drug Resist, 373 J Asthma, 374 Coronary Artery Dis, 375 Microcirculation, 376 Women Health, 377 J Strength Cond Res, 378 Nutr Res, 379 Scand J Clin Lab Inv, 380 Health Care Manage R, 381 Clin Pediatr, 382 Crit Care, 383 Periton Dialysis Int, 384 Biol Neonate, 385 Cancer Treat Rev, 386 Clin Perinatol, 387 Jpen-Parenter Enter, 388 Curr Med Res Opin, 389 Asaio J, 390 Pediatr Allergy Immu, 391 Stud Family Plann, 392 Internal Med, 393 J Public Health Med, 394 J Assist Reprod Gen, 395 Angiology, 396 Biomed Pharmacother, 397 J Diabetes Complicat, 398 J Med Screen, 399 Pediatr Surg Int, 400 Chinese Med J-Peking, 401 Int J Qual Health C, 402 J Nurs Admin, 403 Fam Med, 404 Quest, 405 Heart Surg Forum, 406 Infection, 407 J Clin Nurs, 408 Eur J Anaesth, 409 Curr Opin Obstet Gyn, 410 Clin Nutr, 411 Gerontology, 412 Surg Laparo Endo Per, 413 Mycopathologia, 414 Am J Nephrol, 415 Ann Roy Coll Surg, 416 J Clin Anesth, 417 Growth Horm Igf Res, 418 Int J Gynecol Cancer, 419 Digest Surg, 420 Semin Nephrol, 421 Semin Dialysis, 422 Int J Technol Assess, 423 Chirurg, 424 Mycoses, 425 Prog Cardiovasc Dis, 426 Gynecol Obstet Inves, 427 Ann Clin Biochem, 428 Aids Patient Care St, 429 Cancer Nurs, 430 Eur J Public Health, 431 J Clin Densitom, 432 Diabetes Obes Metab, 433 Langenbeck Arch Surg, 434 Tumori, 435 Arch Med Res, 436 Arzneimittel-Forsch, 437 J Laparoendosc Adv A, 438 Invest New Drug, 439 Can J Public Health, 440 Pediatr Transplant, 441 Health Place, 442 Eur J Pediatr Surg, 443 J Invest Med, 444 Teach Learn

Med, 445 Anaesth Intens Care, 446 Thorac Cardio Surg, 447 J Telemed Telecare, 448 Postgrad Med, 449 Eur Heart J Suppl, 450 Pediatr Int, 451 J Aging Health, 452 Jpn J Clin Oncol, 453 Endocr J, 454 J Sport Med Phys Fit, 455 Respiration, 456 Bioethics, 457 Z Kardiol, 458 Generations, 459 Presse Med, 460 J Chemotherapy, 461 Birth-Iss Perinat C, 462 Int J Clin Pharm Th, 463 Who Tech Rep Ser, 464 Public Health, 465 Clin Geriatr Med, 466 J Altern Complem Med, 467 Pediatr Anesth, 468 Int J Artif Organs, 469 Platelets, 470 Med Clin-Barcelona, 471 J Am Assoc Gyn Lap, 472 Scand J Public Health, 473 Health Soc Care Comm, 474 Cancer Detect Prev, 475 J Biosoc Sci, 476 J Aerosol Med, 477 Echocardiogr-J Card, 478 Deut Med Wochenschr, 479 Pulm Pharmacol Ther, 480 Eur J Nutr, 481 Blood Press Monit, 482 Int Fam Plan Perspec, 483 Heart Lung, 484 Med Anthropol Q, 485 Croat Med J, 486 J Bone Miner Metab, 487 Public Health Nurs, 488 Am J Health Behav, 489 Cardiol Young, 490 Perspect Biol Med, 491 J Travel Med, 492 J Nurs Scholarship, 493 Crit Care Clin, 494 Europace, 495 Herz, 496 Fetal Diagn Ther, 497 Pediatr Emerg Care, 498 Obstet Gynecol Surv, 499 Blood Pressure, 500 Cardiovasc Drug Ther, 501 J Nurs Educ, 502 Adv Nurs Sci, 503 Nutr Metab Cardiovas, 504 Vasc Med, 505 Cardiovasc Pathol, 506 Transpl Immunol, 507 Can J Appl Physiol, 508 Kennedy Inst Ethic J, 509 Physiol Meas, 510 Am J Perinat, 511 Can J Surg, 512 Xenotransplantation, 513 Western J Nurs Res, 514 Int J Nurs Stud, 515 Fund Clin Pharmacol, 516 Physiol Res, 517 J Eval Clin Pract, 518 Best Pract Res Cl En, 519 J Rural Health, 520 Gynecol Endocrinol, 521 Israel Med Assoc J, 522 Int J Sport Nutr Exe, 523 J Aging Stud, 524 Obstet Gyn Clin N Am, 525 Diabetes Educator, 526 J Exp Clin Canc Res, 527 J Interv Card Electr, 528 Pediatr Exerc Sci, 529 J Korean Med Sci, 530 Child Care Hlth Dev, 531 Drug Inf J, 532 J Perinat Med, 533 Dan Med Bull, 534 J Thromb Thrombolys, 535 Clev Clin J Med, 536 Ann Nutr Metab, 537 Semin Reprod Med, 538 J Healthc Manag, 539 Int J Behav Med, 540 Disasters, 541 Blood Purificat, 542 Wien Klin Wochenschr, 543 Altern Ther Health M, 544 Mt Sinai J Med, 545 Am J Nurs, 546 J Med Philos, 547 Complement Ther Med, 548 Clin Exp Hypertens, 549 Indian J Med Res, 550 Int Angiol, 551 Clin Drug Invest, 552 J Crit Care, 553 Jpn J Physiol, 554 J Palliative Care, 555 Am J Med Qual, 556 J Health Care Poor U, 557 J Nutr Sci Vitaminol, 558 Arch Mal Coeur Vaiss, 559 Chemotherapy, 560 J Trop Pediatrics, 561 Breast, 562 J Formos Med Assoc, 563 J Clin Ethic, 564 Arch Pediatrie, 565 J Health Commun, 566 Int J Vitam Nutr Res, 567 Med Oncol, 568 J Clin Pharm Ther, 569 Nurs Ethics, 570 Anaesthesist, 571 Eur J Gynaecol Oncol, 572 Nurs Educ Today, 573 J Neurosurg Anesth, 574 Renal Failure, 575 Cult Med Psychiat, 576 Chem Immunol, 577 Pathol Biol, 578 J Psychosoc Oncol, 579 Clin Rev Allerg Immu, 580 Can J Aging, 581 Emerg Med Clin N Am, 582 Surg Oncol, 583 Health Promot Int, 584 Nurs Outlook, 585 Zbl Chir, 586 Scand J Prim Health, 587 Clin Auton Res, 588 Onkologie, 589 Neth J Med, 590 Health Commun, 591 Ann Chir, 592 J Psychosom Obst Gyn, 593 Method Find Exp Clin, 594 Rev Saude Publ, 595 Sarcoidosis Vasc Dif, 596 Yonsei Med J, 597 J Commun Health, 598 Scand Cardiovasc J, 599 Allergy Asthma Proc, 600 Can Fam Physician, 601 Pediatr Hemat Oncol, 602 J Appl Gerontol, 603 J Electrocardiol, 604 Scand J Caring Sci, 605 Health Care Anal, 606 J Prof Nurs, 607 Eur Surg Res, 608 J Teach Phys Educ, 609 Rev Esp Cardiol, 610 Perfusion-Uk, 611 Adv Renal Replace Th, 612 Clin Anat, 613 Hypertens Pregnancy, 614 Best Pract Res Cl Ob, 615 Ann Trop Paediatr, 616 Women Health Iss, 617 Ann Clin Lab Sci, 618 Sci Eng Ethics, 619 Jpn J Infect Dis, 620 Tohoku J Exp Med, 621 Lung, 622 Clin Appl Thromb-Hem, 623 Acta Cardiol, 624 Geriatrics, 625 Behav Med, 626 J Aging Phys Activ, 627 J Clin Lab Anal, 628 Int Surg, 629 Diabetes Nutr Metab, 630 Eval Health Prof, 631 Saudi Med J, 632 Rev Med Interne, 633 Gesundheitswesen, 634 Drugs Today, 635 J Invest Allerg Clin, 636 J Cardiac Surg, 637 Primary Care, 638 Arch Gerontol Geriat, 639 Acta Chir Belg, 640 J Elder Abuse Negl, 641 Negotiation J, 642 Geriatr Nurs, 643 Vasa-J Vascular Dis, 644 J Hum Nutr Diet, 645 J Hum Movement Stud, 646 Adapt Phys Act Q, 647 Nutr Res Rev, 648 J Women Aging, 649 Ann Endocrinol-Paris, 650 Nurs Clin N Am, 651 Educ Gerontol, 652 Microbiologica, 653 Camb Q Healthc Ethic, 654 Jpn Heart J, 655 Int J Health Plan M, 656 Contrib Nephrol, 657 Hosp Med, 658 Midwifery, 659 Pharm World Sci, 660 Tex Heart I J, 661 Appl Nurs Res, 662 Acta Diabetol, 663 Trop Doct, 664 Med Lett Drugs Ther, 665 Clin Invest Med, 666 Kidney Blood Press R, 667 Phlebology, 668 Salud Publica Mexico, 669 Klin Padiatr, 670 Curr Ther Res Clin E, 671 Medicina-Buenos Aire, 672 J Public Health Pol, 673 Ann Fr Anesth, 674 B Cancer, 675 Monatsschr Kinderh, 676 Drug Exp Clin Res, 677 J Invest Surg, 678 Fam Community Health, 679 Natl Med J India, 680 J Int Med Res, 681 Brit J Biomed Sci, 682 Nurs Sci Quart, 683 Clin Lab Med, 684 Rev Med Chile, 685 Clin Hemorheol Micro, 686 Therapie, 687 Adv Ther, 688 Int J Obstet Anesth, 689 Pediatr Ann, 690 Ecol Food Nutr, 691 J Nurs Care Qual, 692 Endocrinologist, 693 Heart Vessels, 694 Med Klin, 695 Cardiovasc Drug Rev, 696 Rev Epidemiol Sante, 697 J Midwifery Wom Heal, 698 Anasth Intensiv Notf, 699 Ernahrungs-Umschau, 700 Sem Resp Crit Care M, 701 Med Inform Internet, 702 Int J Fertil Women M, 703 Rev Med Microbiol, 704 Acad Psychiatr, 705 Rev Mal Respir, 706 Soz Praventiv Med, 707 Theor Med Bioeth, 708 J Environ Health, 709 Wild Environ Med, 710 Undersea Hyperbar M, 711 Nefrologia, 712 Arch Latinoam Nutr, 713 Ann Biol Clin-Paris, 714 J Physiol Biochem, 715 J Trace Elem Exp Med, 716 J Music Ther, 717 Turkish J Pediatr, 718 J Mal Vascul, 719 Child Health Care, 720 Asian Pac J Allergy, 721 Anasth Intensivmed, 722 Geburtsh Frauenheilk, 723 Minim Invasiv Ther, 724 Rev Invest Clin, 725 Allergologie, 726 Magnesium Res, 727 Infect Med, 728 Internist, 729 Med Maladies Infect, 730 Strength Cond J, 731 Int J Clin Pharm Res, 732 Z Gerontol Geriatr, 733 Panminerva Med, 734 Acta Clin Belg, 735 Kardiologiya, 736 Upsala J Med Sci, 737 Sci Sport, 738 Terapevt Arkh, 739 J Mycol Med, 740 Nephrology, 741 Scot Med J, 742 Formulary, 743 Irish J Med Sci, 744 Lab Med, 745 Rev Clin Esp, 746 J Perinat Neonat Nur, 747 B Acad Nat Med Paris, 748 Ethiopian Med J, 749 Nephrologie, 750 Med Prin Pract, 751 Dialysis Transplant, 752 Chem Unserer Zeit, 753 Biol Sport, 754 Top Geriatr Rehabil, 755 Dm-Dis Mon, 756 Ann Saudi Med, 757 Chir



Gastroenterol, 758 J Chir-Paris, 759 Acta Med Aust, 760 Rev Fr Allergol, 761 W Indian Med J, 762 Jpn J Phys Fit Sport, 763 S Afr J Surg, 764 Ejso, 765 Med Sport, 766 Man India

### 3 Physics (10%)

1 Phys Rev Lett, 2 Phys Rev B, 3 Appl Phys Lett, 4 J Appl Phys, 5 J Chem Phys, 6 Phys Rev E, 7 J Phys Chem B, 8 Phys Rev D, 9 Langmuir, 10 Phys Rev A, 11 Macromolecules, 12 Chem Phys Lett, 13 Phys Lett B, 14 J Phys Chem A, 15 Adv Mater, 16 Chem Mater, 17 J Phys-Condens Mat, 18 Opt Lett, 19 Electron Lett, 20 Jpn J Appl Phys, 21 Polymer, 22 Nucl Phys B, 23 Acta Mater, 24 J Electrochem Soc, 25 Mat Sci Eng A-Struct, 26 Thin Solid Films, 27 Surf Sci, 28 Ieee Photonic Tech L, 29 J Cryst Growth, 30 J Appl Polym Sci, 31 Rev Mod Phys, 32 Appl Optics, 33 J Phys A-Math Gen, 34 J Colloid Interf Sci, 35 Phys Chem Chem Phys, 36 Europhys Lett, 37 Phys Lett A, 38 J Magn Magn Mater, 39 J Mater Chem, 40 Phys Rev C, 41 Nucl Instrum Meth A, 42 J Lightwave Technol, 43 J Am Ceram Soc, 44 Phys Plasmas, 45 Appl Surf Sci, 46 Phys Rep, 47 Rev Sci Instrum, 48 Nano Lett, 49 Surf Coat Tech, 50 Electrochim Acta, 51 Opt Commun, 52 Ieee T Electron Dev, 53 Physica B, 54 Synthetic Met, 55 J Alloy Compd, 56 J Power Sources, 57 J Non-Cryst Solids, 58 Nucl Phys A, 59 Physica A, 60 J Mater Res, 61 Nucl Instrum Meth B, 62 Scripta Mater, 63 J Phys D Appl Phys, 64 Physica C, 65 Ieee T Magn, 66 J Mater Sci, 67 J Vac Sci Technol B, 68 J Phys Soc Jpn, 69 Solid State Ionics, 70 Colloid Surface A, 71 Eur Phys J B, 72 J Electroanal Chem, 73 J Math Phys, 74 Physica D, 75 J Stat Phys, 76 J Phys B-At Mol Opt, 77 J Polym Sci Pol Chem, 78 Sensor Actuat B-Chem, 79 J Opt Soc Am B, 80 Ieee Electr Device L, 81 Mater Sci Forum, 82 Carbon, 83 Solid State Commun, 84 J Nucl Mater, 85 Metall Mater Trans A, 86 Appl Phys A-Mater, 87 Ieee J Sel Top Quant, 88 Chem Phys, 89 J Vac Sci Technol A, 90 Ieee J Quantum Elect, 91 J Eur Ceram Soc, 92 Opt Express, 93 Appl Phys B-Lasers O, 94 Classical Quant Grav, 95 Ieee T Appl Supercon, 96 Eur Phys J C, 97 J Solid State Chem, 98 Sensor Actuat A-Phys, 99 J Appl Crystallogr, 100 Sci Am, 101 Phys Status Solidi B, 102 Diam Relat Mater, 103 J Polym Sci Pol Phys, 104 Mat Sci Eng B-Solid, 105 Mater Lett, 106 Phys Status Solidi A, 107 J Comput Chem, 108 Electrochem Solid St, 109 Philos T Roy Soc A, 110 Comput Phys Commun, 111 Macromol Chem Phys, 112 Corros Sci, 113 Macromol Rapid Comm, 114 Nucl Fusion, 115 Mater Trans, 116 Nucl Phys B-Proc Sup, 117 Solid State Electron, 118 Nanotechnology, 119 Rep Prog Phys, 120 Eur Phys J D, 121 Meas Sci Technol, 122 J Mol Struc-Theochem, 123 Ieee T Nucl Sci, 124 Mol Phys, 125 Mrs Bull, 126 J Phys Chem Solids, 127 Opt Eng, 128 Supercond Sci Tech, 129 Polym Eng Sci, 130 Phys Today, 131 Jetp Lett+, 132 Microelectron Eng, 133 Physica E, 134 Fusion Eng Des, 135 Mater Chem Phys, 136 Prog Polym Sci, 137 J Microelectromech S, 138 J Photoch Photobio A, 139 Int J Quantum Chem, 140 J Lumin, 141 Eur Polym J, 142 Plasma Phys Contr F, 143 Adv Funct Mater, 144 Semicond Sci Tech, 145 Biomacromolecules, 146 Electrochem Commun, 147 J Quant Spec-

trosc Ra, 148 J Electron Mater, 149 Sol Energy Mat Sol C, 150 Int J Bifurcat Chaos, 151 Mater Res Bull, 152 Int J Mod Phys A, 153 Spectrochim Acta A, 154 Polym Degrad Stab, 155 Chaos, 156 J Rheol, 157 Intermetallics, 158 Macromol Symp, 159 Ieee T Instrum Meas, 160 Ieee T Plasma Sci, 161 Ultramicroscopy, 162 Eur Phys J E, 163 Chemphyschem, 164 Isij Int, 165 Mater Sci Tech-Lond, 166 J Appl Electrochem, 167 Annu Rev Phys Chem, 168 J Non-Newton Fluid, 169 Corrosion, 170 J Exp Theor Phys+, 171 Ibm J Res Dev, 172 J Microsc-Oxford, 173 J Mod Optic, 174 Phys Scripta, 175 Surf Interface Anal, 176 J Micromech Microeng, 177 J Phys Iv, 178 Adv Colloid Interfac, 179 Curr Opin Colloid In, 180 Radiat Phys Chem, 181 Polym Int, 182 Eur Phys J A, 183 Key Eng Mater, 184 J Electron Spectrosc, 185 Mod Phys Lett A, 186 Comp Mater Sci, 187 Vacuum, 188 J Low Temp Phys, 189 Int J Hydrogen Energy, 190 Ferroelectrics, 191 Chaos Soliton Fract, 192 J Phys G Nucl Partic, 193 Opt Mater, 194 Mat Sci Eng R, 195 Int J Mod Phys B, 196 Radiat Meas, 197 Ann Phys-New York, 198 J Opt B-Quantum S O, 199 Astropart Phys, 200 J Raman Spectrosc, 201 Metall Mater Trans B, 202 Colloid Polym Sci, 203 Colloid Surface B, 204 Faraday Discuss, 205 Microelectron Reliab, 206 Phys Solid State+, 207 Prog Theor Phys, 208 Z Metallkd, 209 Acta Phys Pol B, 210 J Sol-Gel Sci Techn, 211 J Mol Spectrosc, 212 Plasma Sources Sci T, 213 Ceram Int, 214 J Synchrotron Radiat, 215 Phys World, 216 Mat Sci Eng C-Bio S, 217 Theor Chem Acc, 218 Appl Clay Sci, 219 Liq Cryst, 220 J Biomed Opt, 221 Adv Eng Mater, 222 Hyperfine Interact, 223 Am J Phys, 224 Cryst Res Technol, 225 Phil Mag Lett, 226 Curr Opin Solid St M, 227 Solid State Sci, 228 Chinese Phys Lett, 229 Adv Polym Sci, 230 Can J Phys, 231 React Funct Polym, 232 Oxid Met, 233 J Opt A-Pure Appl Op, 234 Rheol Acta, 235 Acta Crystallogr A, 236 Cryogenics, 237 Polym J, 238 J Ceram Soc Jpn, 239 Int J Theor Phys, 240 Polym Test, 241 Macromol Mater Eng, 242 Theor Math Phys+, 243 Prog Surf Sci, 244 Polym Composite, 245 Gen Relat Gravit, 246 Z Kristallogr, 247 J Mol Liq, 248 Surf Rev Lett, 249 Jom-Us, 250 Phys Atom Nucl+, 251 Polym Bull, 252 J Korean Phys Soc, 253 Chem J Chinese U, 254 Prog Part Nucl Phys, 255 Quantum Electron+, 256 Prog Org Coat, 257 Superlattice Microst, 258 Model Simul Mater Sc, 259 J Adhes Sci Technol, 260 Polym Advan Technol, 261 Rubber Chem Technol, 262 J Supercond, 263 Int J Mod Phys D, 264 Russ J Phys Chem+, 265 Opt Spectrosc+, 266 J Mater Sci-Mater El, 267 Tetsu To Hagane, 268 Laser Phys, 269 Metrologia, 270 Surf Eng, 271 Ieee T Semiconduct M, 272 Plasma Phys Rep+, 273 Integr Ferroelectr, 274 Opt Quant Electron, 275 Int J Chem Kinet, 276 Int J Mod Phys C, 277 X-Ray Spectrom, 278 J Therm Spray Techn, 279 Opt Laser Eng, 280 Macromol Theor Simul, 281 Tech Phys Lett+, 282 Int Rev Phys Chem, 283 Mater Charact, 284 Weld J, 285 Semiconductors+, 286 Prog Photovoltaics, 287 J Jpn I Met, 288 Solid State Phenom, 289 Microsc Microanal, 290 Prog Theor Phys Supp, 291 Tech Phys+, 292 Fortschr Phys, 293 Braz J Phys, 294 Eur Phys J-Appl Phys, 295 Acta Phys Sin-Ch Ed, 296 J Macromol Sci Pure, 297 J Electron Microsc, 298 Iee P-Optoelectron, 299 J Solid State Electr, 300 Electrochemistry, 301 J Electroceram, 302 Microelectron J, 303 Mater Corros, 304 Czech J

Phys, 305 Mrs Internet J N S R, 306 J Nanosci Nanotechno, 307 Int J Adhes Adhes, 308 Found Phys, 309 Z Phys Chem, 310 Opt Laser Technol, 311 Z Naturforsch A, 312 Low Temp Phys+, 313 J Macromol Sci Phys, 314 Plasma Chem Plasma P, 315 Mater High Temp, 316 Calphad, 317 Infrared Phys Techn, 318 J New Mat Electr Sys, 319 Ann Phys-Berlin, 320 Mat Sci Semicon Proc, 321 Chem Vapor Depos, 322 J Mater Eng Perform, 323 Atom Data Nucl Data, 324 Phys Met Metallogr+, 325 Ironmak Steelmak, 326 Solid State Technol, 327 Top Appl Phys, 328 Int Mater Rev, 329 Laser Part Beams, 330 Mater Res Innov, 331 Am Ceram Soc Bull, 332 Solid State Nucl Mag, 333 Mod Phys Lett B, 334 Phys Chem Glasses, 335 Acta Phys Pol A, 336 Fractals, 337 Pramana-J Phys, 338 Scand J Metall, 339 Inst Phys Conf Ser, 340 Mol Simulat, 341 Wave Random Media, 342 Contrib Plasm Phys, 343 Defect Diffus Forum, 344 B Mater Sci, 345 Opt Rev, 346 J Res Natl Inst Stan, 347 Interface Sci, 348 Plast Rubber Compos, 349 Int J Refract Met H, 350 Radiat Eff Defect S, 351 Appl Magn Reson, 352 Opt Fiber Technol, 353 Russ J Appl Chem+, 354 High Perform Polym, 355 Crystallogr Rep+, 356 J Surfactants Deterg, 357 Colloid J+, 358 Sci Technol Weld Joi, 359 Semiconduct Semimet, 360 Chinese Phys, 361 High Temp+, 362 Stud Appl Math, 363 Commun Theor Phys, 364 J Plasma Phys, 365 J Adhesion, 366 Adv Quantum Chem, 367 Phase Transit, 368 Polym Sci Ser A+, 369 Contemp Phys, 370 Kaut Gummi Kunstst, 371 Iee P-Circ Dev Syst, 372 T Nonferr Metal Soc, 373 Inorg Mater+, 374 Iee P-Sci Meas Tech, 375 J Struct Chem+, 376 Ieee Circuits Device, 377 Microsyst Technol, 378 Optik, 379 Polym Polym Compos, 380 Int J Powder Metall, 381 High Pressure Res, 382 Int Polym Proc, 383 Found Phys Lett, 384 J Disper Sci Technol, 385 High Temp-High Press, 386 Few-Body Syst, 387 Instrum Exp Tech+, 388 Powder Metall, 389 J Cell Plast, 390 Ieee T Compon Pack T, 391 J Mater Sci Technol, 392 Brit Ceram T, 393 Scanning, 394 Israel J Chem, 395 Materialwiss Werkst, 396 Russ J Electrochem+, 397 Ann Chim-Sci Mat, 398 J Math Chem, 399 Sci China Ser B, 400 Res Chem Intermediat, 401 Part Part Syst Char, 402 Adv Polym Tech, 403 Int J Mod Phys E, 404 Dokl Phys, 405 Powder Diffr, 406 Indian J Pure Ap Phy, 407 J Nonlinear Opt Phys, 408 Acta Polym Sin, 409 Sci China Ser E, 410 Polym-Plast Technol, 411 Polimery-W, 412 J Optoelectron Adv M, 413 Acta Phys-Chim Sin, 414 Displays, 415 Int J Cast Metal Res, 416 Mater Manuf Process, 417 B Electrochem, 418 Laser Focus World, 419 J Ind Eng Chem, 420 New Diam Front C Tec, 421 J Laser Appl, 422 Springer Tr Mod Phys, 423 Compos Interface, 424 Int J Appl Electrom, 425 J Non-Equil Thermody, 426 Prog Cryst Growth Ch, 427 J Inorg Mater, 428 Adv Imag Elect Phys, 429 Solder Surf Mt Tech, 430 Tenside Surfact Det, 431 Micro, 432 Phys Low-Dimens Str, 433 J Adv Mater-Covina, 434 Glass Sci Technol, 435 Acta Phys Slovaca, 436 Zkg Int, 437 High Temp Mat Pr-Isr, 438 Glass Phys Chem+, 439 Rev Mex Fis, 440 J Vinyl Addit Techn, 441 Cell Polym, 442 Kobunshi Ronbunshu, 443 Mater Performance, 444 Rev Metall-Paris, 445 Chinese J Polym Sci, 446 J Opt Technol+, 447 Fiber Integrated Opt, 448 Sensor Mater, 449 Prot Met+, 450 Rev Metal Madrid, 451 T I Met Finish, 452 Plat Surf Finish, 453 Bol Soc Esp Ceram V, 454 Polym-Korea, 455 Pho-

ton Spectra, 456 Des Monomers Polym, 457 Phys Part Nuclei+, 458 Glass Technol, 459 T Indian I Metals, 460 J Polym Eng, 461 Stud Conserv, 462 High Energ Phys Nuc, 463 Anti-Corros Method M, 464 Int J Polym Anal Ch, 465 Kovove Mater, 466 Iran Polym J, 467 Ind Ceram, 468 Heat Treat Met-Uk, 469 High Energ Chem+, 470 Chinese J Phys, 471 J Rare Earth, 472 J Infrared Millim W, 473 High Temp Mater P-U, 474 Laser Eng, 475 J Polym Res, 476 Tech Mess, 477 Corros Prevent Contr, 478 Electron Comm Jpn 2, 479 Opt Appl, 480 Nukleonika, 481 Acta Phys Hung Ns-H, 482 Meas Tech+, 483 Ceram-Silikaty, 484 Rare Metal Mat Eng, 485 Mater World, 486 Indian J Eng Mater S, 487 Metallofiz Nov Tekh+, 488 J Wuhan Univ Technol, 489 J Russ Laser Res, 490 Theor Found Chem Eng, 491 Chem Res Chinese U, 492 Met Sci Heat Treat+, 493 Ferroelectrics Lett, 494 Cfi-Ceram Forum Int, 495 J Plast Film Sheet, 496 J Elastom Plast, 497 Metall, 498 Mater Plast, 499 J Fusion Energ, 500 Ann Phys-Paris, 501 B Chem Soc Ethiopia, 502 Silic Ind

#### 4 Neuroscience (5.8%)

1 J Neurosci, 2 Neuron, 3 Neurology, 4 Nat Neurosci, 5 J Neurophysiol, 6 Brain Res, 7 J Physiol-London, 8 Ann Ny Acad Sci, 9 J Neurochem, 10 Neuroscience, 11 Eur J Neurosci, 12 Ann Neurol, 13 Neuroimage, 14 Brain, 15 J Pharmacol Exp Ther, 16 Neurosci Lett, 17 Neuroreport, 18 J Comp Neurol, 19 Nat Rev Neurosci, 20 Brit J Pharmacol, 21 Eur J Pharmacol, 22 Trends Neurosci, 23 Curr Opin Neurobiol, 24 Exp Brain Res, 25 Pain, 26 Cereb Cortex, 27 Arch Neurol-Chicago, 28 J Neurol Neurosur Ps, 29 Neuropsychologia, 30 Annu Rev Neurosci, 31 Psychopharmacology, 32 J Cognitive Neurosci, 33 J Neurosci Res, 34 Life Sci, 35 Neuropsychopharmacol, 36 Exp Neurol, 37 Epilepsia, 38 J Cerebr Blood F Met, 39 Trends Pharmacol Sci, 40 Neuropharmacology, 41 Behav Brain Res, 42 Neural Comput, 43 Clin Neurophysiol, 44 Movement Disord, 45 Prog Neurobiol, 46 Mol Cell Neurosci, 47 Pharmacol Rev, 48 J Neuroimmunol, 49 Physiol Behav, 50 Pharmacol Biochem Be, 51 Brain Res Rev, 52 Mol Brain Res, 53 J Neurobiol, 54 Hum Brain Mapp, 55 Muscle Nerve, 56 Psychophysiology, 57 Brain Res Bull, 58 J Neurol, 59 Glia, 60 Sleep, 61 J Neuropath Exp Neur, 62 Hippocampus, 63 Neurobiol Aging, 64 Behav Neurosci, 65 J Neurol Sci, 66 Neurosci Biobehav R, 67 Cell Tissue Res, 68 Cognitive Brain Res, 69 Prog Brain Res, 70 Neural Networks, 71 Peptides, 72 J Neurosci Meth, 73 Acta Neuropathol, 74 Neurobiol Dis, 75 Synapse, 76 Dev Med Child Neurol, 77 Horm Behav, 78 Ieee T Bio-Med Eng, 79 Curr Opin Neurol, 80 J Neurotraum, 81 J Neuroendocrinol, 82 Neurochem Res, 83 Cephalalgia, 84 Learn Memory, 85 Dev Brain Res, 86 Brain Cognition, 87 Neuropsychology, 88 Epilepsy Res, 89 J Child Neurol, 90 Headache, 91 Neurochem Int, 92 J Comp Physiol A, 93 Neurosci Res, 94 Psychoneuroendocrino, 95 J Int Neuropsych Soc, 96 N-S Arch Pharmacol, 97 Biol Cybern, 98 Acta Neurol Scand, 99 Regul Peptides, 100 Chem Senses, 101 Brain Pathol, 102 J Neural Transm, 103 J Anat, 104 Int J Psychophysiol, 105 Neuromuscular Disord, 106 Biol Psychol, 107 Neurobiol

Learn Mem, 108 Eur J Neurol, 109 J Clin Exp Neuropsych, 110 Mult Scler, 111 Neurocomputing, 112 Neuroendocrinology, 113 Visual Neurosci, 114 Pediatr Neurol, 115 J Neurovirol, 116 Cortex, 117 Dev Psychobiol, 118 Clin J Pain, 119 Neurotoxicology, 120 J Biol Rhythm, 121 Neurotoxicol Teratol, 122 Dement Geriatr Cogn, 123 Neuropath Appl Neuro, 124 J Neurocytol, 125 J Sleep Res, 126 Can J Physiol Pharm, 127 Dev Neuropsychol, 128 Brain Dev-Jpn, 129 J Comput Neurosci, 130 J Clin Neurophysiol, 131 Eur Neurol, 132 Neurol Res, 133 Behav Pharmacol, 134 J Mol Neurosci, 135 Ment Retard Dev D R, 136 Int J Dev Neurosci, 137 Seizure-Eur J Epilep, 138 Neuropediatrics, 139 Mol Neurobiol, 140 Front Neuroendocrin, 141 Brain Behav Evolut, 142 Neuroscientist, 143 J Pineal Res, 144 J Chem Neuroanat, 145 Neurocase, 146 Cell Mol Neurobiol, 147 Dev Neurosci-Basel, 148 Clin Neuropharmacol, 149 Hum Movement Sci, 150 Brain Behav Immun, 151 Neuroepidemiology, 152 Acta Pharmacol Sin, 153 Arch Clin Neuropsych, 154 Chronobiol Int, 155 Sleep Med Rev, 156 Can J Neurol Sci, 157 Auton Neurosci-Basic, 158 Alz Dis Assoc Dis, 159 Eur J Pain, 160 Neuropeptides, 161 Int Rev Neurobiol, 162 Neurol Sci, 163 J Physiol-Paris, 164 Network-Comp Neural, 165 Rev Neurosci, 166 Soc Res, 167 Pharmacology, 168 Parkinsonism Relat D, 169 J Neuroimaging, 170 Int J Neurosci, 171 Neurol Clin, 172 J Pain, 173 Brain Res Protoc, 174 Clin Neurol Neurosur, 175 Rev Neurol-France, 176 Brain Topogr, 177 Semin Neurol, 178 Amyotroph Lateral Sc, 179 Somatosens Mot Res, 180 J Physiol Pharmacol, 181 J Peripher Nerv Syst, 182 Neurophysiol Clin, 183 Rev Neurologia, 184 Neurogenetics, 185 Neuropathology, 186 Child Neuropsychol, 187 Arq Neuro-Psiquiat, 188 Epileptic Disord, 189 Pol J Pharmacol, 190 Motor Control, 191 Neuroimmunomodulat, 192 Neuroendocrinol Lett, 193 Restor Neurol Neuros, 194 J Vestibul Res-Equil, 195 Psychol Belg, 196 Arch Ital Biol, 197 Behav Neurol, 198 J Psychophysiol, 199 Acta Neurobiol Exp, 200 Schmerz, 201 Neuromodulation, 202 J Recept Sig Transd, 203 Int J Hum-Comput Int, 204 B Exp Biol Med+, 205 Funct Neurol, 206 Neurologist, 207 Biol Rhythm Res, 208 Nervenheilkunde, 209 Integr Phys Beh Sci, 210 Acta Neurol Belg, 211 Acta Med Okayama, 212 Salud Ment, 213 Adv Anat Embryol Cel, 214 Folia Neuropathol, 215 Acta Biol Hung, 216 Zh Vyssh Nerv Deyat+, 217 Neurosci Res Commun, 218 Aktuel Neurol, 219 J Evol Biochem Phys+, 220 Rev Neuropsychol, 221 Chinese J Physiol, 222 Acupuncture Electro, 223 Zh Nevropatol Psikh, 224 Cesk Slov Neurol N

## 5 Ecology & Evolution (4.3%)

1 Ecology, 2 P Roy Soc B-Biol Sci, 3 Mar Ecol-Prog Ser, 4 Oecologia, 5 Trends Ecol Evol, 6 Evolution, 7 Mol Ecol, 8 Oikos, 9 Conserv Biol, 10 Am Nat, 11 Ecol Appl, 12 Limnol Oceanogr, 13 J Exp Biol, 14 Forest Ecol Manag, 15 Philos T Roy Soc B, 16 Anim Behav, 17 Mol Phylogenet Evol, 18 Am J Bot, 19 Can J Fish Aquat Sci, 20 Biol Conserv, 21 New Phytol, 22 Hydrobiologia, 23 Aquaculture, 24 Mar Biol, 25 Syst Biol, 26 J Anim Ecol, 27 Ecol Lett, 28 Can J Zool, 29 Global Change Biol, 30 Plant Cell Environ, 31 Can J Forest Res,

32 Behav Ecol Sociobiol, 33 J Ecol, 34 J Theor Biol, 35 J Appl Ecol, 36 J Fish Biol, 37 Freshwater Biol, 38 J Exp Mar Biol Ecol, 39 Bioscience, 40 J Evolution Biol, 41 Ecol Model, 42 Ann Bot-London, 43 J Econ Entomol, 44 Heredity, 45 J Phycol, 46 J Wildlife Manage, 47 Behav Ecol, 48 Biol J Linn Soc, 49 J Biogeogr, 50 Funct Ecol, 51 Tree Physiol, 52 Auk, 53 J Chem Ecol, 54 Ices J Mar Sci, 55 Estuar Coast Shelf S, 56 Ecography, 57 Annu Rev Entomol, 58 Ecol Monogr, 59 J Veg Sci, 60 Environ Entomol, 61 Plant Ecol, 62 Insect Biochem Molec, 63 Comp Biochem Phys A, 64 Condor, 65 J Insect Physiol, 66 Ecosystems, 67 Biodivers Conserv, 68 Int J Plant Sci, 69 J Zool, 70 Gen Comp Endocr, 71 J Plankton Res, 72 Can J Bot, 73 Aquat Microb Ecol, 74 J Mammal, 75 T Am Fish Soc, 76 J Hered, 77 Fish Res, 78 Wildlife Soc B, 79 Entomol Exp Appl, 80 Comp Biochem Phys B, 81 Ann Entomol Soc Am, 82 Estuaries, 83 Genetica, 84 Arch Hydrobiol, 85 Ecol Entomol, 86 J Mar Biol Assoc Uk, 87 Ambio, 88 Bot J Linn Soc, 89 Syst Bot, 90 B Mar Sci, 91 Theor Popul Biol, 92 Insect Mol Biol, 93 Ethology, 94 Naturwissenschaften, 95 Environ Biol Fish, 96 Landscape Ecol, 97 Plant Syst Evol, 98 Biol Control, 99 J N Am Benthol Soc, 100 Copeia, 101 Evol Ecol Res, 102 Biol Rev, 103 J Avian Biol, 104 Mar Freshwater Res, 105 Polar Biol, 106 Ibis, 107 Cladistics, 108 Environ Manage, 109 J Arid Environ, 110 Aquat Bot, 111 Biotropica, 112 Plant Biology, 113 J Morphol, 114 Behaviour, 115 Biol Bull-U.S., 116 Physiol Biochem Zool, 117 Coral Reefs, 118 Wetlands, 119 Global Ecol Biogeogr, 120 J Forest, 121 Aquac Res, 122 N Am J Fish Manage, 123 Phycologia, 124 J Trop Ecol, 125 Fish B-Noaa, 126 Insect Soc, 127 Bird Study, 128 Forest Sci, 129 Ann Mo Bot Gard, 130 Apidologie, 131 Mar Mammal Sci, 132 Evol Ecol, 133 J Invertebr Pathol, 134 J Herpetol, 135 Ecoscience, 136 Fish Oceanogr, 137 J Crustacean Biol, 138 Landscape Urban Plan, 139 Restor Ecol, 140 J Shellfish Res, 141 J Comp Physiol B, 142 Zool Sci, 143 Fisheries Sci, 144 Zool J Linn Soc-Lond, 145 J Math Biol, 146 Eur J Phycol, 147 J Range Manage, 148 Scand J Forest Res, 149 Anim Conserv, 150 Math Biosci, 151 Taxon, 152 Austral Ecol, 153 Am Midl Nat, 154 J Sea Res, 155 B Entomol Res, 156 Mycorrhiza, 157 Bot Mar, 158 Aust J Bot, 159 J Nat Hist, 160 J Insect Behav, 161 Trees-Struct Funct, 162 Fla Entomol, 163 Can Entomol, 164 Ecol Res, 165 Acta Oecol, 166 Ann Forest Sci, 167 Arch Insect Biochem, 168 Biocontrol Sci Techn, 169 Sci Mar, 170 Physiol Entomol, 171 New Zeal J Mar Fresh, 172 Environ Exp Bot, 173 Environ Conserv, 174 Mar Biotechnol, 175 J Arachnol, 176 Fisheries, 177 Funct Plant Biol, 178 J Appl Phycol, 179 J Great Lakes Res, 180 Wildlife Res, 181 Ocean Coast Manage, 182 Eur J Entomol, 183 Rev Fish Biol Fisher, 184 Bot Rev, 185 P Biol Soc Wash, 186 B Math Biol, 187 S Afr J Sci, 188 Zool Scr, 189 Bryologist, 190 Mar Policy, 191 Fish Physiol Biochem, 192 Wilson Bull, 193 Ann Zool Fenn, 194 Herpetologica, 195 J Field Ornithol, 196 Nova Hedwigia, 197 J Plant Res, 198 Crustaceana, 199 J World Aquacult Soc, 200 Southwest Nat, 201 Forest Chron, 202 Appl Entomol Zool, 203 Aquat Living Resour, 204 Sociobiology, 205 Aquat Conserv, 206 Arctic, 207 J Stored Prod Res, 208 Oryx, 209 Aust J Zool, 210 Int J Wildland Fire, 211 Acta Theriol, 212 Nat Area J, 213 Ethol Ecol Evol,

214 Biocontrol, 215 Flora, 216 J Mollus Stud, 217 Photosynthetic, 218 Econ Bot, 219 Aust Syst Bot, 220 Silva Fenn, 221 Int Rev Hydrobiol, 222 J Entomol Sci, 223 Syst Entomol, 224 Can Field Nat, 225 Wildlife Biol, 226 Helgoland Mar Res, 227 Aquat Sci, 228 Waterbirds, 229 J Freshwater Ecol, 230 J Appl Ichthyol, 231 Aquacult Nutr, 232 Ecol Freshw Fish, 233 J Therm Biol, 234 Afr J Ecol, 235 J Zool Syst Evol Res, 236 Acta Zool-Stockholm, 237 Forestry, 238 Veliger, 239 Sarsia, 240 Zool Anz, 241 Mammal Rev, 242 Ardea, 243 New Forest, 244 Novon, 245 Folia Geobot, 246 Zoo Biol, 247 Rev Chil Hist Nat, 248 Folia Zool, 249 J Kansas Entomol Soc, 250 Emu, 251 Nippon Suisan Gakk, 252 Coast Manage, 253 Northwest Sci, 254 J Roy Soc New Zeal, 255 New Zeal J Bot, 256 Cah Biol Mar, 257 Aquacult Eng, 258 Nord J Bot, 259 Ophelia, 260 Am Bee J, 261 Amphibia-Reptilia, 262 Invertebr Biol, 263 Ann Soc Entomol Fr, 264 Int J Pest Manage, 265 Rev Suisse Zool, 266 Rev Biol Trop, 267 J Raptor Res, 268 Ital J Zool, 269 Phys Geogr, 270 Silvae Genet, 271 Raffles B Zool, 272 J Apicult Res, 273 Grana, 274 J Torrey Bot Soc, 275 Coleopt Bull, 276 Brittonia, 277 Israel J Zool, 278 Ann Limnol-Int J Lim, 279 Fisheries Manag Ecol, 280 Mammalia, 281 Malacologia, 282 Aquat Insect, 283 N Am J Aquacult, 284 New Zeal J Zool, 285 Zool Stud, 286 Ichthyol Res, 287 Zool Zh, 288 Aquacult Int, 289 Cryptogamie Algol, 290 Southwest Entomol, 291 Biologia, 292 Zoomorphology, 293 S Afr J Bot, 294 Symbiosis, 295 Vie Milieu, 296 Belg J Zool, 297 Ann Bot Fenn, 298 Ornis Fennica, 299 New Zeal J Ecol, 300 Cienc Mar, 301 J Bryol, 302 Forstwiss Centralbl, 303 Am Fern J, 304 Cybium, 305 Herpetol J, 306 Ostrich, 307 Aust J Entomol, 308 Deut Entomol Z, 309 Ocean Dev Int Law, 310 Allg Forst Jagdztg, 311 Israel J Plant Sci, 312 Stud Neotrop Fauna E, 313 Biochem Genet, 314 Rev Ecol-Terre Vie, 315 Arch Fish Mar Res, 316 J Ethol, 317 Nautilus, 318 Great Lakes Entomol, 319 S Afr J Wildl Res, 320 Phytocoenologia, 321 Zoology, 322 Amazoniana, 323 Trop Zool, 324 Folia Biol-Krakow, 325 Bee World, 326 Acta Soc Bot Pol, 327 Phytol-Ann Rei Bot A, 328 Tex J Sci, 329 Afr Entomol, 330 Ecol Bratislava, 331 J Aquat Plant Manage, 332 Jpn J Appl Entomol Z, 333 Interiencia, 334 Bot Helv, 335 Entomol Gen, 336 J Conchol, 337 Rhodora, 338 Calif Fish Game, 339 Blumea, 340 J Adv Zool, 341 Bothalia, 342 Acta Bot Gallica, 343 Ohio J Sci, 344 Isr J Aquacult-Bamid, 345 Belg J Bot, 346 Russ J Ecol+, 347 Acta Zool Acad Sci H, 348 Odonatologica, 349 Entomol Fennica

## 6 Economics (3.5%)

1 Am Econ Rev, 2 J Financ, 3 Q J Econ, 4 Econometrica, 5 J Polit Econ, 6 J Financ Econ, 7 Econ J, 8 J Econometrics, 9 J Econ Perspect, 10 J Monetary Econ, 11 Rev Econ Stud, 12 Rev Econ Stat, 13 J Econ Lit, 14 Eur Econ Rev, 15 Rev Financ Stud, 16 J Int Econ, 17 J Econ Theory, 18 J Public Econ, 19 World Dev, 20 Rand J Econ, 21 J Labor Econ, 22 J Dev Econ, 23 Int Econ Rev, 24 Econ Lett, 25 J Hum Resour, 26 J Bus Econ Stat, 27 J Health Econ, 28 J Econ Behav Organ, 29 J Financ Quant Anal, 30 J Urban Econ, 31 Ind Labor Relat Rev, 32 Game Econ Behav, 33 J Law Econ Organ, 34 J

Bus, 35 Natl Tax J, 36 Am J Agr Econ, 37 J Law Econ, 38 J Money Credit Bank, 39 Economet Theor, 40 J Econ Growth, 41 Ecol Econ, 42 J Bank Financ, 43 World Bank Econ Rev, 44 J Dev Stud, 45 J Account Econ, 46 J Appl Econom, 47 Public Choice, 48 J Environ Econ Manag, 49 Econ Theor, 50 Int J Ind Organ, 51 J Accounting Res, 52 Can J Econ, 53 J Econ Dyn Control, 54 Brookings Pap Eco Ac, 55 Math Financ, 56 J Ind Econ, 57 Appl Econ, 58 Ind Relat, 59 J Risk Uncertainty, 60 Econ Inq, 61 Energ Policy, 62 South Econ J, 63 Oxford B Econ Stat, 64 Econ Educ Rev, 65 Health Econ, 66 J Policy Anal Manag, 67 Reg Sci Urban Econ, 68 Land Econ, 69 J Econ Manage Strat, 70 Soc Choice Welfare, 71 J Int Money Financ, 72 Oxford Econ Pap, 73 Account Rev, 74 Economica, 75 Econ Dev Cult Change, 76 J Comp Econ, 77 Financ Manage, 78 Oxford Rev Econ Pol, 79 Scand J Econ, 80 Cambridge J Econ, 81 Environ Resour Econ, 82 World Econ, 83 J Math Econ, 84 Ids Bull-I Dev Stud, 85 Mon Labor Rev, 86 Dev Change, 87 Int J Game Theory, 88 Math Soc Sci, 89 Energy J, 90 J Popul Econ, 91 Brit J Ind Relat, 92 J Financ Intermed, 93 Econ Transit, 94 Agr Econ, 95 Small Bus Econ, 96 Int Tax Public Finan, 97 Rev Ind Organ, 98 J Regional Sci, 99 Energ Econ, 100 Resour Energy Econ, 101 Real Estate Econ, 102 Int J Forecasting, 103 J Econ Psychol, 104 Theor Decis, 105 J Labor Res, 106 J Forecasting, 107 Macroecon Dyn, 108 Kyklos, 109 J Real Estate Financ, 110 J Econ Educ, 111 Int Rev Law Econ, 112 Scot J Polit Econ, 113 J Regul Econ, 114 J Futures Markets, 115 J Afr Econ, 116 Eur Rev Agric Econ, 117 J Portfolio Manage, 118 J Hous Econ, 119 J Econ, 120 Appl Econ Lett, 121 Food Policy, 122 J Jpn Int Econ, 123 J Inst Theor Econ, 124 J Risk Insur, 125 J Agr Econ, 126 China Econ Rev, 127 Can Public Pol, 128 J Econ Issues, 129 Resour Policy, 130 Int Labour Rev, 131 Jpn World Econ, 132 Int J Manpower, 133 J Policy Model, 134 Eur J Ind Relat, 135 J Macroecon, 136 Relat Ind-Ind Relat, 137 Contemp Econ Policy, 138 Econ Philos, 139 J Evol Econ, 140 S Afr J Econ, 141 Am J Econ Sociol, 142 Econ Model, 143 Auditing-J Pract Th, 144 Econ Rec, 145 Aust J Agr Resour Ec, 146 B Indones Econ Stud, 147 Can J Dev Stud, 148 Can J Agr Econ, 149 Jahrb Natl Stat, 150 Eastern Eur Econ, 151 J Post Keynesian Ec, 152 Economist-Netherland, 153 Int J Sust Dev World, 154 Betrieb Forsch Prax, 155 Polit Ekon, 156 Dev Econ, 157 Open Econ Rev, 158 Ekon Cas, 159 Trimest Econ

## 7 Geosciences (3.4%)

1 J Geophys Res, 2 Geophys Res Lett, 3 Earth Planet Sc Lett, 4 Geology, 5 J Climate, 6 Geochim Cosmochim Ac, 7 Atmos Environ, 8 J Atmos Sci, 9 Chem Geol, 10 Tectonophysics, 11 Palaeogeogr Palaeocl, 12 Quaternary Sci Rev, 13 Mon Weather Rev, 14 Geophys J Int, 15 B Am Meteorol Soc, 16 J Phys Oceanogr, 17 Remote Sens Environ, 18 Mar Geol, 19 Geol Soc Am Bull, 20 Ieee T Geosci Remote, 21 Int J Remote Sens, 22 Q J Roy Meteor Soc, 23 Am Mineral, 24 Global Biogeochem Cy, 25 Icarus, 26 Clim Dynam, 27 Contrib Mineral Petr, 28 B Seismol Soc Am, 29 J Petrol, 30 Geophysics, 31 J Appl Meteorol, 32 Climatic Change, 33 Quaternary Res, 34 Precambrian Res, 35 Agr Forest Meteorol, 36 J Atmos

Ocean Tech, 37 J Volcanol Geoth Res, 38 Paleooceanography, 39 Sediment Geol, 40 Int J Climatol, 41 Deep-Sea Res Pt II, 42 Deep-Sea Res Pt I, 43 Lithos, 44 J Struct Geol, 45 Tectonics, 46 Phys Earth Planet In, 47 Geomorphology, 48 J Air Waste Manage, 49 Cont Shelf Res, 50 Org Geochem, 51 Prog Oceanogr, 52 J Geol Soc London, 53 Sedimentology, 54 Adv Space Res, 55 Holocene, 56 Global Planet Change, 57 Mar Chem, 58 J Sediment Res, 59 Meteorit Planet Sci, 60 Can J Earth Sci, 61 Photogramm Eng Rem S, 62 Bound-Lay Meteorol, 63 Rev Geophys, 64 Aapg Bull, 65 Space Sci Rev, 66 Earth-Sci Rev, 67 Ann Glaciol, 68 J Aerosol Sci, 69 Tellus B, 70 Aerosol Sci Tech, 71 Econ Geol, 72 J Quaternary Sci, 73 Curr Sci India, 74 Ann Geophys-Germany, 75 J Metamorph Geol, 76 Earth Surf Proc Land, 77 Chinese Sci Bull, 78 J Glaciol, 79 Quatern Int, 80 J Marine Syst, 81 J Geol, 82 Eur J Mineral, 83 Pure Appl Geophys, 84 J Atmos Sol-Terr Phy, 85 Terra Nova, 86 Paleobiology, 87 Am J Sci, 88 J Vertebr Paleontol, 89 Int J Earth Sci, 90 Planet Space Sci, 91 J Paleontol, 92 Annu Rev Earth Pl Sc, 93 Mar Micropaleontol, 94 B Volcanol, 95 Comput Geosci-Uk, 96 Radio Sci, 97 Climate Res, 98 Can Mineral, 99 J Coastal Res, 100 Palaios, 101 J Hydrometeorol, 102 Aust J Earth Sci, 103 J Paleolimnol, 104 Mar Petrol Geol, 105 J Meteorol Soc Jpn, 106 Mineral Mag, 107 Phys Chem Miner, 108 Geol Mag, 109 Tellus A, 110 Miner Deposita, 111 Clay Clay Miner, 112 J Geodyn, 113 Weather Forecast, 114 Radiocarbon, 115 J Atmos Chem, 116 Rev Palaeobot Palyno, 117 Geophys Prospect, 118 Arct Antarct Alp Res, 119 Palaeontology, 120 Earth Planets Space, 121 Global Environ Chang, 122 J Asian Earth Sci, 123 Boreas, 124 Theor Appl Climatol, 125 J Appl Geophys, 126 J Afr Earth Sci, 127 Atmos Res, 128 Int Geol Rev, 129 J Mar Res, 130 J S Am Earth Sci, 131 Meteorol Atmos Phys, 132 Basin Res, 133 Antarct Sci, 134 Geobios-Lyon, 135 Cretaceous Res, 136 Miner Petrol, 137 J Geochem Explor, 138 Isprs J Photogramm, 139 New Zeal J Geol Geop, 140 B Soc Geol Fr, 141 Sci China Ser D, 142 Permafrost Periglac, 143 Geo-Mar Lett, 144 Clay Miner, 145 Isl Arc, 146 Prog Phys Geog, 147 Petrol Geosci, 148 Atmos Ocean, 149 Dynam Atmos Oceans, 150 Schweiz Miner Petrog, 151 J Foramin Res, 152 Int J Biometeorol, 153 Episodes, 154 Polar Res, 155 Cold Reg Sci Technol, 156 J Seismol, 157 Lethaia, 158 Geodin Acta, 159 Gondwana Res, 160 Micropaleontology, 161 J Geol Soc India, 162 T Roy Soc Edin-Earth, 163 Int J Coal Geol, 164 Geol Geofiz+, 165 Z Geomorphol, 166 B Can Petrol Geol, 167 Nonlinear Proc Geoph, 168 Nat Hazards, 169 J Geodesy, 170 Acta Palaeontol Pol, 171 Acta Geol Sin-Engl, 172 Norw J Geol, 173 J Petrol Geol, 174 Cim Bull, 175 Facies, 176 Geol J, 177 S Afr J Geol, 178 Ore Geol Rev, 179 Meteorol Appl, 180 Ameghina, 181 Eclogae Geol Helv, 182 Acta Petrol Sin, 183 Terr Atmos Ocean Sci, 184 Phys Chem Earth, 185 Surv Geophys, 186 Meteorol Z, 187 Geochem J, 188 Veg Hist Archaeobot, 189 Neues Jahrb Geol P-A, 190 Prog Nat Sci, 191 Gff, 192 Geol Carpath, 193 Adv Atmos Sci, 194 P Geologist Assoc, 195 J Seism Explor, 196 Riv Ital Paleontol S, 197 Alcheringa, 198 Geothermics, 199 Chinese J Geophys-Ch, 200 Neues Jb Miner Monat, 201 Stud Geophys Geod, 202 Photogramm Rec, 203 P Indian As-Earth, 204 Aquat

Geochem, 205 Petrology+, 206 Nuovo Cimento C, 207 Aust Meteorol Mag, 208 Rev Geol Chile, 209 Int J Environ Pollut, 210 Carbonate Evaporite, 211 Stratigr Geo Correl+, 212 J Cold Reg Eng, 213 Neth J Geosci, 214 J Micropalaeontol, 215 Space Policy, 216 Neues Jb Miner Abh, 217 Atmosfera, 218 Scot J Geol, 219 Chem Erde-Geochem, 220 Resour Geol, 221 Geosci Can, 222 Mar Georesour Geotec, 223 Indian J Mar Sci

## 8 Psychology (2.8%)

1 J Pers Soc Psychol, 2 Am Psychol, 3 Psychol Bull, 4 Child Dev, 5 Pers Soc Psychol B, 6 Psychol Sci, 7 Psychol Rev, 8 Dev Psychol, 9 Trends Cogn Sci, 10 Annu Rev Psychol, 11 J Exp Psychol Learn, 12 Vision Res, 13 Cognition, 14 Pers Individ Differ, 15 J Exp Psychol Human, 16 Mem Cognition, 17 Psychon B Rev, 18 Behav Brain Sci, 19 J Mem Lang, 20 J Exp Soc Psychol, 21 Dev Psychopathol, 22 Percept Psychophys, 23 Health Psychol, 24 J Exp Psychol Gen, 25 Organ Behav Hum Dec, 26 J Soc Issues, 27 Psychol Methods, 28 J Pers, 29 Psychol Aging, 30 Brain Lang, 31 Cognition Emotion, 32 J Gerontol B-Psychol, 33 Eur J Soc Psychol, 34 J Appl Soc Psychol, 35 Cognitive Psychol, 36 Curr Dir Psychol Sci, 37 J Exp Child Psychol, 38 Pers Soc Psychol Rev, 39 Q J Exp Psychol-A, 40 J Fam Psychol, 41 Psychol Rep, 42 Sex Roles, 43 J Couns Psychol, 44 Educ Psychol Meas, 45 Psychol Inq, 46 J Cross Cult Psychol, 47 Perception, 48 Psychometrika, 49 J Res Pers, 50 Cognitive Sci, 51 Behav Res Meth Ins C, 52 Appl Cognitive Psych, 53 Acta Psychol, 54 Evol Hum Behav, 55 Eur J Personality, 56 Int J Behav Dev, 57 Soc Dev, 58 Brit J Soc Psychol, 59 Am J Commun Psychol, 60 Percept Motor Skill, 61 Intelligence, 62 J Youth Adolescence, 63 Lang Cognitive Proc, 64 Memory, 65 Appl Psych Meas, 66 Cogn Neuropsychol, 67 J Adolescence, 68 J Exp Anal Behav, 69 Vis Cogn, 70 J Exp Psychol Anim B, 71 Soc Cognition, 72 Behav Process, 73 J Soc Psychol, 74 Pers Relationship, 75 Cognitive Dev, 76 Psychol Women Quart, 77 J Math Psychol, 78 Psychol Res-Psych Fo, 79 Hum Factors, 80 J Adolescent Res, 81 Psychol Health, 82 J Couns Dev, 83 J Educ Behav Stat, 84 Couns Psychol, 85 Multivar Behav Res, 86 J Educ Meas, 87 Brit J Dev Psychol, 88 J Soc Pers Relat, 89 J Exp Psychol-Appl, 90 Adolescence, 91 Brit J Psychol, 92 J Psycholinguist Res, 93 J Res Adolescence, 94 Arch Sex Behav, 95 J Behav Decis Making, 96 J Community Psychol, 97 J Comp Psychol, 98 Merrill Palmer Quart, 99 Infant Behav Dev, 100 Aggressive Behav, 101 J Motor Behav, 102 J Early Adolescence, 103 J Soc Clin Psychol, 104 Comput Hum Behav, 105 Inf Mental Hlth J, 106 Environ Behav, 107 J Marital Fam Ther, 108 J Sex Res, 109 Dev Rev, 110 Basic Appl Soc Psych, 111 Conscious Cogn, 112 J Child Lang, 113 Fam Relat, 114 Fam Process, 115 J Sport Exercise Psy, 116 Cyberpsychol Behav, 117 J Psychol, 118 Language, 119 Motiv Emotion, 120 Int J Intercult Rel, 121 J Environ Psychol, 122 Int J Psychol, 123 J Appl Dev Psychol, 124 Eur J Cogn Psychol, 125 Theor Psychol, 126 Can J Exp Psychol, 127 Q J Exp Psychol-B, 128 Soc Indic Res, 129 Discourse Process, 130 J Consciousness Stud, 131 Appl Meas Educ, 132 Scand

J Psychol, 133 Am J Psychol, 134 Youth Soc, 135 Hum Dev, 136 Hispanic J Behav Sci, 137 Psychol Rec, 138 Int J Aging Hum Dev, 139 J Homosexual, 140 Hum Nature-Int Bios, 141 J Genet Psychol, 142 Soc Sci Comput Rev, 143 Teach Psychol, 144 Ethos, 145 Meas Eval Couns Dev, 146 J Nonverbal Behav, 147 J Appl Sport Psychol, 148 Spatial Vision, 149 New Ideas Psychol, 150 Eur J Psychol Assess, 151 Brit J Health Psych, 152 Anxiety Stress Copin, 153 Exp Aging Res, 154 Soc Behav Personal, 155 J Theor Soc Behav, 156 Learn Motiv, 157 Behav Analyst, 158 Can J Behav Sci, 159 Ann Psychol, 160 J Multicult Couns D, 161 Fem Psychol, 162 Aging Neuropsychol C, 163 Mind Lang, 164 Sport Psychol, 165 Linguistics, 166 Cult Psychol, 167 J Neurolinguist, 168 Lang Speech, 169 Int J Sport Psychol, 170 J Gen Psychol, 171 J Community Appl Soc, 172 J Classif, 173 Ecol Psychol, 174 Genet Soc Gen Psych, 175 Am J Fam Ther, 176 J Psychol Theol, 177 Swiss J Psychol, 178 Psychologist, 179 Soc Sci Inform, 180 J Adult Dev, 181 Psicothema, 182 Color Res Appl, 183 J Fam Ther, 184 Connect Sci, 185 Z Entwickl Padagogis, 186 Ethics Behav, 187 Curr Psychol, 188 Psychol Rundsch, 189 Lingua, 190 Contemp Fam Ther, 191 Z Sozialpsychol, 192 Cah Psychol Cogn, 193 Aust J Psychol, 194 Philos Psychol, 195 Psychol Erz Unterr, 196 Humor, 197 Zygon, 198 J Mind Behav, 199 Z Psychol, 200 J Constr Psychol, 201 New Zeal J Psychol, 202 Women Ther, 203 J Relig Health, 204 J Humanist Psychol, 205 Psychologia, 206 J Parapsychol, 207 Jpn Psychol Res, 208 Stud Psychol, 209 Cesk Psychol, 210 Rev Lat Am Psicol

## 9 Chemistry (2.7%)

1 J Am Chem Soc, 2 Angew Chem Int Edit, 3 Chem Commun, 4 Chem Rev, 5 J Org Chem, 6 Tetrahedron Lett, 7 Org Lett, 8 Inorg Chem, 9 Tetrahedron, 10 J Med Chem, 11 Chem-Eur J, 12 Accounts Chem Res, 13 Organometallics, 14 Bioorg Med Chem Lett, 15 J Organomet Chem, 16 Synlett, 17 Coordin Chem Rev, 18 Curr Opin Chem Biol, 19 Chem Lett, 20 Eur J Org Chem, 21 J Mol Catal A-Chem, 22 Tetrahedron-Asymmetr, 23 J Nat Prod, 24 Bioorgan Med Chem, 25 Eur J Inorg Chem, 26 J Magn Reson, 27 Synthesis-Stuttgart, 28 J Biomol Nmr, 29 Inorg Chim Acta, 30 J Mol Struct, 31 Curr Med Chem, 32 Bioconjugate Chem, 33 New J Chem, 34 Carbohydr Res, 35 Polyhedron, 36 Pure Appl Chem, 37 J Chem Inf Comp Sci, 38 Helv Chim Acta, 39 Chem Soc Rev, 40 B Chem Soc Jpn, 41 J Inorg Biochem, 42 Chembiochem, 43 Chem Pharm Bull, 44 Synthetic Commun, 45 Green Chem, 46 J Biol Inorg Chem, 47 Adv Synth Catal, 48 Acta Crystallogr B, 49 Acta Crystallogr C, 50 Heterocycles, 51 Z Anorg Allg Chem, 52 Nat Prod Rep, 53 Inorg Chem Commun, 54 Can J Chem, 55 J Comb Chem, 56 J Fluorine Chem, 57 J Comput Aid Mol Des, 58 Chirality, 59 J Antibiot, 60 Magn Reson Chem, 61 Med Res Rev, 62 Appl Organomet Chem, 63 Prog Nucl Mag Res Sp, 64 Eur J Med Chem, 65 Monatsh Chem, 66 B Kor Chem Soc, 67 J Mol Graph Model, 68 Acta Crystallogr E, 69 Dyes Pigments, 70 J Heterocyclic Chem, 71 Aust J Chem, 72 Indian J Chem B, 73 Curr Org Chem, 74 Usp Khim+, 75 Russ Chem B+, 76 Nucleos Nucleot Nucl,

77 J Phys Org Chem, 78 J Chem Educ, 79 Org Process Res Dev, 80 Collect Czech Chem C, 81 Cryst Growth Des, 82 J Porphyr Phthalocya, 83 Transit Metal Chem, 84 J Incl Phenom Macro, 85 Acta Chim Sinica, 86 J Chem Res-S, 87 J Labelled Compd Rad, 88 Expert Opin Ther Pat, 89 Origins Life Evol B, 90 Phosphorus Sulfur, 91 Pol J Chem, 92 Z Naturforsch B, 93 Comb Chem High T Scr, 94 Chinese J Chem, 95 Russ J Gen Chem+, 96 Supramol Chem, 97 J Indian Chem Soc, 98 Chimia, 99 Russ J Org Chem+, 100 Syn React Inorg Met, 101 Chinese Chem Lett, 102 J Chin Chem Soc-Taip, 103 Mendeleev Commun, 104 J Coord Chem, 105 J Carbohydr Chem, 106 Russ J Coord Chem+, 107 Heteroatom Chem, 108 J Syn Org Chem Jpn, 109 Molecules, 110 Z Krist-New Cryst St, 111 J Fluoresc, 112 Bioorg Chem, 113 Chinese J Inorg Chem, 114 Org Prep Proced Int, 115 Asian J Chem, 116 Arkivoc, 117 J Chem Crystallogr, 118 Main Group Met Chem, 119 Arch Pharm, 120 Chinese J Org Chem, 121 Turk J Chem, 122 Croat Chem Acta, 123 Struct Chem, 124 J Clust Sci, 125 Drug Future, 126 Propell Explos Pyrot, 127 Heterocycl Commun, 128 J Serb Chem Soc, 129 Khim Geterotsikl+, 130 Indian J Heterocy Ch, 131 Yakugaku Zasshi, 132 Comment Inorg Chem, 133 Chinese J Struc Chem, 134 Adv Heterocycl Chem, 135 Rev Roum Chim, 136 J Asian Nat Prod Res, 137 Oxid Commun, 138 J Inorg Organomet P, 139 Med Chem Res, 140 Acta Chim Slov, 141 Actual Chimique, 142 Chim Oggi, 143 Afinidad, 144 J Chem Soc Pakistan, 145 J Chem Sci

## 10 Psychiatry (2.4%)

1 Am J Psychiat, 2 Biol Psychiat, 3 Arch Gen Psychiat, 4 J Consult Clin Psych, 5 J Clin Psychiat, 6 J Am Acad Child Psy, 7 Brit J Psychiat, 8 Psychol Med, 9 Addiction, 10 J Abnorm Psychol, 11 J Child Psychol Psyc, 12 Schizophr Res, 13 Alcohol Clin Exp Res, 14 Psychosom Med, 15 Psychiat Serv, 16 Mol Psychiatr, 17 Behav Res Ther, 18 J Affect Disorders, 19 Acta Psychiat Scand, 20 J Stud Alcohol, 21 Drug Alcohol Depen, 22 J Nerv Ment Dis, 23 J Psychosom Res, 24 Schizophrenia Bull, 25 Int J Eat Disorder, 26 J Abnorm Child Psych, 27 J Clin Psychopharm, 28 Psychiat Res, 29 Clin Psychol Rev, 30 Psychol Assessment, 31 Int J Geriatr Psych, 32 Addict Behav, 33 Clin Psychol-Sci Pr, 34 Child Abuse Neglect, 35 J Clin Psychol, 36 J Interpers Violence, 37 J Autism Dev Disord, 38 J Subst Abuse Treat, 39 Soc Psych Psych Epid, 40 J Trauma Stress, 41 Law Human Behav, 42 Aust Nz J Psychiat, 43 Psychol Addict Behav, 44 Am J Geriatr Psychiat, 45 Behav Genet, 46 Prof Psychol-Res Pr, 47 Compr Psychiat, 48 Cognitive Ther Res, 49 Prog Neuro-Psychoph, 50 Am J Orthopsychiat, 51 J Psychiat Res, 52 Bipolar Disord, 53 Alcohol Alcoholism, 54 Psychosomatics, 55 J Pers Assess, 56 Subst Use Misuse, 57 Eur Neuropsychopharm, 58 Exp Clin Psychopharm, 59 Am J Ment Retard, 60 Int Clin Psychopharm, 61 Psychiat Res-Neuroim, 62 Psychiat Clin N Am, 63 Psychother Psychosom, 64 Behav Ther, 65 Cns Drugs, 66 Gen Hosp Psychiat, 67 Crim Justice Behav, 68 Depress Anxiety, 69 Am J Drug Alcohol Ab, 70 Psychol Public Pol L, 71 J Psychopharmacol, 72 J Appl Behav Anal, 73 Neu-

ropsychobiology, 74 J Am Coll Health, 75 J Neuropsych Clin N, 76 J Intell Disabil Res, 77 J Anxiety Disord, 78 J Child Adol Psychop, 79 J Pers Disord, 80 Eur Psychiat, 81 Suicide Life-Threat, 82 Eur Arch Psy Clin N, 83 Brit J Clin Psychol, 84 Alcohol, 85 Child Adol Psych Cl, 86 Int J Neuropsychoph, 87 Behav Modif, 88 J Drug Issues, 89 Behav Sci Law, 90 Eur Child Adoles Psy, 91 Community Ment Hlt J, 92 Aggress Violent Beh, 93 Am J Addiction, 94 Assessment, 95 Psychiat Clin Neuros, 96 Psychother Res, 97 Psychiatry, 98 Pharmacopsychiatry, 99 J Psychoactive Drugs, 100 Ment Retard, 101 Nervenarzt, 102 Res Dev Disabil, 103 Int Psychogeriatr, 104 J Fam Violence, 105 Alcohol Res Health, 106 Hum Psychopharm Clin, 107 Aging Ment Health, 108 J Psychiatr Neurosci, 109 Harvard Rev Psychiat, 110 Int J Offender Ther, 111 J Psychopathol Behav, 112 Psychiat Genet, 113 Psychother Psych Med, 114 J Addict Dis, 115 Eval Program Plann, 116 Eur Eat Disord Rev, 117 Curr Opin Psychiatr, 118 Int J Soc Psychiatr, 119 Int J Law Psychiat, 120 Evaluation Rev, 121 Drug Alcohol Rev, 122 Psychopathology, 123 Clin Psychol Psychot, 124 Int J Psychiat Med, 125 J Geriatr Psych Neur, 126 Psychiatr Rehabil J, 127 Psychiat Ann, 128 J Am Acad Psychiatry, 129 Int Rev Psychiatr, 130 Psychiat Prax, 131 Psychiat Quart, 132 Psychotherapeut, 133 B Menninger Clin, 134 Psychol Crime Law, 135 Eur Addict Res, 136 J Child Adoles Subst, 137 Diagnostica, 138 Nord J Psychiat, 139 J Behav Ther Exp Psy, 140 J Ect, 141 J Appl Res Intellect, 142 Z Psychosom Med Psyc, 143 Child Psychiat Hum D, 144 J Drug Educ, 145 Aust Psychol, 146 J Dev Phys Disabil, 147 Addict Biol, 148 Adm Policy Ment Hlth, 149 Ann Med Interne, 150 Encephale, 151 Fortschr Neurol Psyc, 152 Am J Eval, 153 Child Fam Behav Ther, 154 Behav Change, 155 J Clin Psychol Med S, 156 Int J Group Psychoth, 157 Z Kl Psych Psychoth, 158 Drug-Educ Prev Polic, 159 Int J Clin Exp Hyp, 160 Israel J Psychiat, 161 Arch Psychiat Nurs, 162 Appl Psychophys Biof, 163 Indian J Soc Work, 164 Can Psychol, 165 Verhaltenstherapie, 166 Z Kinder Jug-Psych, 167 Prax Kinderpsychol K, 168 Art Psychother, 169 Evol Psychiatr, 170 Gruppenpsychother Gr, 171 Acta Neuropsychiatr, 172 Eur J Psychiat, 173 Psychopharmakotherapie, 174 Neuropsychiatrie, 175 Z Klin Psych Psychia, 176 Nord Psykol, 177 Neurol Psychiat Br, 178 Am J Clin Hypn

## 11 Environmental Chemistry & Microbiology (2.3%)

1 Appl Environ Microb, 2 Environ Sci Technol, 3 Water Res, 4 Chemosphere, 5 Water Resour Res, 6 Environ Toxicol Chem, 7 Sci Total Environ, 8 Soil Biol Biochem, 9 Soil Sci Soc Am J, 10 J Environ Qual, 11 Water Sci Technol, 12 Plant Soil, 13 Environ Pollut, 14 J Hydrol, 15 Biotechnol Bioeng, 16 Appl Microbiol Biot, 17 Int J Food Microbiol, 18 J Food Protect, 19 J Appl Microbiol, 20 Hydrol Process, 21 Int J Syst Evol Micr, 22 Fems Microbiol Ecol, 23 Agr Ecosyst Environ, 24 Mar Pollut Bull, 25 Biol Fert Soils, 26 Bioresource Technol, 27 Agron J, 28 Water Air Soil Poll, 29 Environ Microbiol, 30 J Biotechnol, 31 Enzyme Microb Tech, 32 Geoderma, 33 Biogeochemistry, 34 Microbial Ecol, 35 Aquat Toxicol,

36 J Microbiol Meth, 37 Appl Geochem, 38 J Contam Hydrol, 39 Arch Environ Con Tox, 40 T Asae, 41 Biotechnol Progr, 42 Lett Appl Microbiol, 43 J Hydraul Eng-Asce, 44 Soil Till Res, 45 J Hazard Mater, 46 Process Biochem, 47 Biotechnol Lett, 48 Adv Water Resour, 49 Eur J Soil Sci, 50 Field Crop Res, 51 Appl Soil Ecol, 52 Catena, 53 J Chem Technol Biot, 54 Soil Sci, 55 J Environ Eng-Asce, 56 Anton Leeuw Int J G, 57 Ground Water, 58 Can J Microbiol, 59 Comp Biochem Phys C, 60 Mar Environ Res, 61 Syst Appl Microbiol, 62 J Biosci Bioeng, 63 Curr Microbiol, 64 J Am Water Resour As, 65 Ecotox Environ Safe, 66 Commun Soil Sci Plan, 67 B Environ Contam Tox, 68 J Soil Water Conserv, 69 Environ Int, 70 Transport Porous Med, 71 J Environ Monitor, 72 Environ Monit Assess, 73 Aust J Soil Res, 74 J Mol Catal B-Enzym, 75 Agr Water Manage, 76 Eur J Agron, 77 Environ Geol, 78 Agr Syst, 79 J Plant Nutr Soil Sc, 80 Environ Technol, 81 Waste Manage, 82 J Ind Microbiol Biot, 83 Nutr Cycl Agroecosys, 84 Agroforest Syst, 85 J Environ Manage, 86 Adv Agron, 87 Can J Soil Sci, 88 J Hydraul Res, 89 J Am Water Works Ass, 90 Appl Biochem Biotech, 91 Food Microbiol, 92 Hum Ecol Risk Assess, 93 J Plant Nutr, 94 Ecol Eng, 95 Extremophiles, 96 Pedobiologia, 97 J Agr Sci, 98 Soil Use Manage, 99 Hydrogeol J, 100 Hydrolog Sci J, 101 Biochem Eng J, 102 Water Environ Res, 103 Geomicrobiol J, 104 Hydrol Earth Syst Sc, 105 Math Geol, 106 Biodegradation, 107 World J Microb Biot, 108 Agronomie, 109 Land Degrad Dev, 110 J Water Res Pl-Asce, 111 Comput Electron Agr, 112 Environ Toxicol, 113 Int Biodeter Biodegr, 114 Soil Sci Plant Nutr, 115 Environ Modell Softw, 116 Resour Conserv Recy, 117 Eur J Soil Biol, 118 Ecotoxicology, 119 Appl Eng Agric, 120 Waste Manage Res, 121 Crit Rev Microbiol, 122 J Irrig Drain E-Asce, 123 Environ Eng Sci, 124 Environ Sci Pollut R, 125 Microbiology+, 126 Biofouling, 127 Biotechnol Adv, 128 Water Qual Res J Can, 129 Irrigation Sci, 130 Fresen Environ Bull, 131 New Zeal J Agr Res, 132 Compost Sci Util, 133 Water Sa, 134 Acta Hydroch Hydrob, 135 J Microbiol Biotechn, 136 Ground Water Monit R, 137 Rev Environ Contam T, 138 Adsorpt Sci Technol, 139 Water Int, 140 J Environ Sci Heal B, 141 Microbiol Res, 142 J Gen Appl Microbiol, 143 Sar Qsar Environ Res, 144 Ozone-Sci Eng, 145 Adsorption, 146 J Agron Crop Sci, 147 Folia Microbiol, 148 Anaerobe, 149 J Water Supply Res T, 150 Biocatal Biotransfor, 151 Zuckerindustrie, 152 Cytotechnology, 153 J Basic Microb, 154 J Food Safety, 155 Nord Hydrol, 156 Environ Geochem Hlth, 157 Environ Prog, 158 Adv Appl Microbiol, 159 Isot Environ Healt S, 160 J Sustain Agr, 161 Biol Agric Hortic, 162 Appl Biochem Micro+, 163 Agrochimica, 164 Landbauforsch Volk, 165 Int Sugar J, 166 Food Biotechnol, 167 Food Technol Biotech, 168 Arch Lebensmittelhyg, 169 J Environ Biol, 170 Acta Agr Scand B-S P, 171 J Rapid Meth Aut Mic, 172 Bodenkultur, 173 J Microbiol, 174 Eurasian Soil Sci+, 175 Indian J Agron, 176 J Agr U Puerto Rico, 177 Seibutsu-Kogaku Kais, 178 J Fac Agr Kyushu U, 179 Discov Innovat

## 12 Mathematics (2.0%)

1 Commun Math Phys, 2 P Am Math Soc, 3 J Algebra, 4 T Am Math Soc, 5 Invent Math, 6 J Math Anal Appl, 7 J Funct Anal, 8 Duke Math J, 9 Ann Math, 10 J Differ Equations, 11 Math Ann, 12 J Reine Angew Math, 13 Nonlinear Anal-Theor, 14 Commun Algebra, 15 J Am Math Soc, 16 Commun Pur Appl Math, 17 Lect Notes Math, 18 Math Z, 19 Arch Ration Mech An, 20 Adv Math, 21 J Lond Math Soc, 22 J Pure Appl Algebra, 23 Commun Part Diff Eq, 24 Israel J Math, 25 Pac J Math, 26 Siam J Math Anal, 27 Compos Math, 28 Int Math Res Notices, 29 Indiana U Math J, 30 Am J Math, 31 Math Res Lett, 32 J Differ Geom, 33 Geom Funct Anal, 34 Topology, 35 P Lond Math Soc, 36 Ergod Theor Dyn Syst, 37 Stud Math, 38 Nonlinearity, 39 Topol Appl, 40 Manuscripta Math, 41 Comput Math Appl, 42 Mem Am Math Soc, 43 Ann I Fourier, 44 J Number Theory, 45 Ann Sci Ecole Norm S, 46 B Lond Math Soc, 47 Acta Arith, 48 Comment Math Helv, 49 Asterisque, 50 Acta Math-Djursholm, 51 Math Comput Model, 52 Appl Comput Harmon A, 53 Appl Math Comput, 54 Can J Math, 55 Russ Math Surv+, 56 J Math Pure Appl, 57 P Roy Soc Edinb A, 58 Math Nachr, 59 Math Proc Cambridge, 60 Mich Math J, 61 Discrete Cont Dyn S, 62 Integr Equat Oper Th, 63 J Anal Math, 64 Calc Var Partial Dif, 65 Lett Math Phys, 66 Rev Math Phys, 67 Geometriae Dedicata, 68 Ann I H Poincare-An, 69 Arch Math, 70 J Operat Theor, 71 Appl Math Lett, 72 Illinois J Math, 73 Sb Math+, 74 J Geom Phys, 75 Fund Math, 76 J Approx Theory, 77 Math Notes+, 78 K-Theory, 79 J Fourier Anal Appl, 80 Sci China Ser A, 81 Infin Dimens Anal Qu, 82 J Algebraic Geom, 83 Commun Anal Geom, 84 Int J Math, 85 B Aust Math Soc, 86 Constr Approx, 87 Acta Math Sin, 88 Forum Math, 89 J Math Soc Jpn, 90 Potential Anal, 91 Math Method Appl Sci, 92 Monatsh Math, 93 J Knot Theor Ramif, 94 Osaka J Math, 95 Rev Mat Iberoam, 96 Q J Math, 97 Can Math Bull, 98 Nagoya Math J, 99 Ann Henri Poincare, 100 Z Angew Math Phys, 101 Semigroup Forum, 102 Diff Equat+, 103 B Soc Math Fr, 104 Asymptotic Anal, 105 Rocky Mt J Math, 106 Houston J Math, 107 Q Appl Math, 108 Exp Math, 109 Funct Anal Appl+, 110 Ann Math Stud, 111 P Edinburgh Math Soc, 112 J Group Theory, 113 Tohoku Math J, 114 Acta Math Hung, 115 Int J Algebr Comput, 116 Siberian Math J+, 117 Commun Contemp Math, 118 Publ Res I Math Sci, 119 Ann Glob Anal Geom, 120 Acta Appl Math, 121 Math Scand, 122 Rep Math Phys, 123 J Nonlinear Sci, 124 Ann Acad Sci Fenn-M, 125 J Differ Equ Appl, 126 Glasgow Math J, 127 Eur J Appl Math, 128 Algebra Univ, 129 B Sci Math, 130 Taiwan J Math, 131 Indagat Math New Ser, 132 Differ Geom Appl, 133 Math Inequal Appl, 134 Chinese Ann Math B, 135 P Jpn Acad A-Math, 136 J Math Kyoto U, 137 Publ Math-Debrecen, 138 Algebr Colloq, 139 Indian J Pure Ap Mat, 140 P Indian As-Math Sci, 141 J Nonlinear Math Phy, 142 Positivity, 143 B Belg Math Soc-Sim, 144 Czech Math J, 145 Appl Categor Struct, 146 Russ J Math Phys, 147 Acta Math Sci, 148 Integr Transf Spec F, 149 Abh Math Sem Hamburg

## 13 Computer Science (1.4%)

1 Lect Notes Comput Sc, 2 Commun Acm, 3 Lect Notes Artif Int, 4 Ieee T Comput, 5 Computer, 6 Theor Comput Sci, 7 Discrete Math, 8 Artif Intell, 9 Siam J Comput, 10 Mach Learn, 11 Discrete Appl Math, 12 J Acm, 13 Ieee T Parall Distr, 14 Ieee T Knowl Data En, 15 Discrete Comput Geom, 16 Inform Syst, 17 J Comb Theory B, 18 Ieee T Software Eng, 19 Ieee Intell Syst, 20 J Comput Syst Sci, 21 Acm Comput Surv, 22 J Algorithm, 23 Ieee Software, 24 J Comb Theory A, 25 Ieee Micro, 26 Ieee Internet Comput, 27 Random Struct Algor, 28 Algorithmica, 29 Inform Process Lett, 30 Eur J Combin, 31 J Graph Theor, 32 Design Code Cryptogr, 33 J Symbolic Logic, 34 Ieee T Evolut Comput, 35 J Symb Comput, 36 Inform Comput, 37 Adv Appl Math, 38 Ibm Syst J, 39 Acm T Inform Syst, 40 J Syst Software, 41 Combinatorica, 42 Int J Hum-Comput St, 43 Parallel Comput, 44 J Artif Intell Res, 45 Vldb J, 46 Comp Geom-Theor Appl, 47 Acm T Database Syst, 48 Ann Pure Appl Logic, 49 J Parallel Distr Com, 50 Siam J Discrete Math, 51 Acm T Comput Syst, 52 Data Knowl Eng, 53 Comb Probab Comput, 54 Ai Mag, 55 Inform Software Tech, 56 J Comb Des, 57 Data Min Knowl Disc, 58 J Cryptol, 59 Acm T Progr Lang Sys, 60 Expert Syst Appl, 61 Ann Math Artif Intel, 62 J Algebr Comb, 63 Ars Combinatoria, 64 J Complexity, 65 Future Gener Comp Sy, 66 Graph Combinator, 67 Comput J, 68 J Logic Comput, 69 Software Pract Exper, 70 Int J High Perform C, 71 Artif Intell Med, 72 Artif Life, 73 Comput Intell, 74 Comput Linguist, 75 B Symb Log, 76 Real-Time Syst, 77 Comput Secur, 78 Acm Sigplan Notices, 79 Acta Inform, 80 Appl Algebr Eng Comm, 81 Appl Artif Intell, 82 Math Logic Quart, 83 Theor Comput Syst, 84 Int J Comput Geom Ap, 85 J Autom Reasoning, 86 Distrib Parallel Dat, 87 Knowl-Based Syst, 88 Utilitas Mathematica, 89 J Comb Optim, 90 Artif Intell Rev, 91 Int J Coop Inf Syst, 92 J Intell Inf Syst, 93 Sci Comput Program, 94 Knowl Eng Rev, 95 Eng Appl Artif Intel, 96 Interact Comput, 97 Order, 98 New Generat Comput, 99 Comput Humanities, 100 Bt Technol J, 101 Distrib Comput, 102 Int J Softw Eng Know, 103 Appl Intell, 104 Adv Comput, 105 Rairo-Theor Inf Appl, 106 J Supercomput, 107 Iee P-Comput Dig T, 108 Form Method Syst Des, 109 J Syst Architect, 110 J Exp Theor Artif In, 111 J Visual Lang Comput, 112 Ai Commun, 113 Microprocess Microsy, 114 Simul-T Soc Mod Sim, 115 Int J Parallel Prog, 116 Software Qual J, 117 Wirtschaftsinf, 118 Fibonacci Quart, 119 Ieee Ann Hist Comput, 120 Integr Comput-Aid E, 121 Fujitsu Sci Tech J, 122 Comput Stand Inter, 123 Expert Syst, 124 Smppte Motion Imag J

## 14 Analytic Chemistry (1.4%)

1 Anal Chem, 2 J Agr Food Chem, 3 J Chromatogr A, 4 Anal Chim Acta, 5 Electrophoresis, 6 J Chromatogr B, 7 Phytochemistry, 8 Analyst, 9 Rapid Commun Mass Sp, 10 Talanta, 11 J Food Sci, 12 Food Chem, 13 J Anal Atom Spectrom, 14 J Sci Food Agr, 15 Appl Spectrosc, 16 Int J Mass Spectrom, 17 Biosens Bioelectron, 18 J Pharmaceut Biomed, 19 J Am



Soc Mass Spectr, 20 Planta Med, 21 Electroanal, 22 Spectrochim Acta B, 23 J Mass Spectrom, 24 J Food Eng, 25 Carbohydr Polym, 26 J Ethnopharmacol, 27 Anal Sci, 28 J Am Oil Chem Soc, 29 Chromatographia, 30 Trac-Trend Anal Chem, 31 Cereal Chem, 32 J Aoac Int, 33 Chemometr Intell Lab, 34 Food Res Int, 35 Food Addit Contam, 36 Postharvest Biol Tec, 37 Eur Food Res Technol, 38 J Chemometr, 39 J Cereal Sci, 40 Phytother Res, 41 Anal Lett, 42 Food Hydrocolloid, 43 Trends Food Sci Tech, 44 Int J Biol Macromol, 45 Mass Spectrom Rev, 46 J Liq Chromatogr R T, 47 Lwt-Food Sci Technol, 48 Int J Food Sci Tech, 49 J Biochem Bioph Meth, 50 Bioelectrochemistry, 51 Z Naturforsch C, 52 Dry Technol, 53 Biochem Syst Ecol, 54 Food Qual Prefer, 55 Microchem J, 56 Fitoterapia, 57 Am J Enol Viticult, 58 Phytomedicine, 59 Food Technol-Chicago, 60 Vib Spectrosc, 61 Starch-Starke, 62 Eur J Lipid Sci Tech, 63 Flavour Frag J, 64 J Chromatogr Sci, 65 J Brazil Chem Soc, 66 Crit Rev Food Sci, 67 Nahrung, 68 Geostandard Newslett, 69 Phytochem Analysis, 70 Food Control, 71 J Essent Oil Res, 72 Biomed Chromatogr, 73 Int J Environ An Ch, 74 J Near Infrared Spec, 75 Accred Qual Assur, 76 Ind Crop Prod, 77 Arch Pharm Res, 78 J Anal Chem+, 79 Chinese J Anal Chem, 80 Lc Gc N Am, 81 Cereal Food World, 82 Deut Lebensm-Rundsch, 83 Bunseki Kagaku, 84 Quim Nova, 85 Jpc-J Planar Chromat, 86 J Texture Stud, 87 Int J Food Sci Nutr, 88 Food Sci Technol Int, 89 Sci Aliment, 90 Pharm Biol, 91 J Am Soc Brew Chem, 92 J I Brewing, 93 J Sens Stud, 94 Am Lab, 95 Eur J Mass Spectrom, 96 Crit Rev Anal Chem, 97 Chem Anal-Warsaw, 98 J Food Quality, 99 J Food Biochem, 100 J Food Process Eng, 101 Atom Spectrosc, 102 Am J Chinese Med, 103 Spectrosc Spect Anal, 104 Food Agr Immunol, 105 Luminescence, 106 Ital J Food Sci, 107 Ann Chim-Rome, 108 Spectrosc Lett, 109 Plant Food Hum Nutr, 110 J Food Process Pres, 111 Spectroscopy, 112 J Food Sci Tech Mys, 113 J Food Hyg Soc Jpn, 114 J Hopkins Apl Tech D, 115 Food Bioprod Process, 116 J Jpn Soc Food Sci, 117 Food Rev Int, 118 Instrum Sci Technol, 119 J Food Drug Anal, 120 Grasas Aceites, 121 J Food Lipids, 122 Chem Listy, 123 Acta Aliment Hung, 124 Can J Anal Sci Spect, 125 Food Aust, 126 Genet Eng News, 127 Iran J Chem Chem Eng, 128 Bangladesh J Botany, 129 Cuban J Agr Sci

## 15 Business & Marketing (1.2%)

1 Acad Manage J, 2 Manage Sci, 3 J Appl Psychol, 4 Strategic Manage J, 5 Acad Manage Rev, 6 Admin Sci Quart, 7 Organ Sci, 8 J Marketing Res, 9 J Marketing, 10 Res Policy, 11 J Manage, 12 J Organ Behav, 13 Market Sci, 14 J Consum Res, 15 Mis Quart, 16 J Vocat Behav, 17 Hum Relat, 18 Pers Psychol, 19 J Acad Market Sci, 20 J Manage Stud, 21 J Int Bus Stud, 22 J Manage Inform Syst, 23 Inform Syst Res, 24 Organ Stud, 25 Inform Manage-Amster, 26 Calif Manage Rev, 27 J Bus Res, 28 Hum Resource Manage, 29 J Oper Manag, 30 J Occup Organ Psych, 31 Decis Support Syst, 32 J Retailing, 33 J Prod Innovat Manag, 34 Organization, 35 Leadership Quart, 36 Work Employ Soc, 37 Appl Psychol-Int Rev, 38 Int J Oper Prod Man, 39 Ind Market Manag, 40 J Bus Venturing, 41 Group Organ Manage, 42 Int J Res Mark, 43 Decision Sci,

44 J Advertising Res, 45 J Advertising, 46 Organ Dyn, 47 J Bus Ethics, 48 Ieee T Eng Manage, 49 Int J Select Assess, 50 Small Gr Res, 51 Hum Perform, 52 Psychol Market, 53 Int J Electron Comm, 54 J Public Policy Mark, 55 Career Dev Q, 56 Account Org Soc, 57 Int J Technol Manage, 58 Eur J Inform Syst, 59 RFD Manage, 60 J Organ Change Manag, 61 J Career Assessment, 62 Long Range Plann, 63 Technol Forecast Soc, 64 Internet Res, 65 Behav Inform Technol, 66 Res Technol Manage, 67 J World Bus, 68 J Bus Psychol, 69 New Tech Work Employ, 70 Technol Anal Strateg, 71 J Strategic Inf Syst, 72 J Inf Technol, 73 Int J Inform Manage, 74 Econ Ind Democracy, 75 Mil Psychol, 76 J Int Marketing, 77 J Manage Inquiry, 78 Manage Learn, 79 J Small Bus Manage, 80 Int J Serv Ind Manag, 81 Technovation, 82 Pers Rev, 83 Public Pers Manage, 84 Futures, 85 Inform Syst J, 86 Z Arb Organ, 87 J Career Dev, 88 Ind Manage Data Syst, 89 J Eng Technol Manage, 90 Brit J Guid Couns, 91 J Employment Couns, 92 J Sport Manage, 93 Adv Consum Res, 94 Inform Syst Manage, 95 J Consum Aff, 96 Serv Ind J, 97 Group Decis Negot, 98 J Comput Inform Syst, 99 Transport J, 100 Gruppensdynamik Organ, 101 Adult Educ Quart

## 16 Political Science (1.2%)

1 Am Polit Sci Rev, 2 Am J Polit Sci, 3 Int Organ, 4 World Polit, 5 Int Security, 6 J Polit, 7 J Democr, 8 Comp Polit Stud, 9 J Conflict Resolut, 10 Int Stud Quart, 11 Eur J Polit Res, 12 China Quart, 13 Comp Polit, 14 J Eur Public Policy, 15 J Peace Res, 16 J Common Mark Stud, 17 Brit J Polit Sci, 18 Annu Rev Polit Sci, 19 Polit Soc, 20 Public Admin Rev, 21 Polit Res Quart, 22 Public Opin Quart, 23 Elect Stud, 24 Legis Stud Quart, 25 Polit Psychol, 26 Party Polit, 27 Ps-Polit Sci Polit, 28 Public Admin, 29 J Theor Polit, 30 Third World Q, 31 China J, 32 Wash Quart, 33 Governance, 34 Rev Int Stud, 35 E Eur Polit Soc, 36 Int Aff, 37 Asian Surv, 38 Polit Stud-London, 39 Int Polit Sci Rev, 40 Int Interact, 41 Eur J Int Relat, 42 Soc Policy Admin, 43 Polit Sci Quart, 44 Parliament Aff, 45 Polit Theory, 46 Stud Comp Int Dev, 47 Secur Stud, 48 Polit Quart, 49 Mod China, 50 Armed Forces Soc, 51 Policy Polit, 52 Millennium-J Int St, 53 Europe-Asia Stud, 54 Communis Post-Commun, 55 Post-Sov Aff, 56 Hum Rights Quart, 57 J Eur Soc Policy, 58 Polit Behav, 59 J Soc Policy, 60 J Strategic Stud, 61 Policy Rev, 62 Issues Stud, 63 Lat Am Res Rev, 64 Scand Polit Stud, 65 Local Gov Stud, 66 Glob Gov, 67 J Lat Am Stud, 68 Judicature, 69 Pac Rev, 70 Admin Soc, 71 Defence Peace Econ, 72 Polit Vierteljahr, 73 Public Money Manage, 74 Gov Oppos, 75 Public Admin Develop, 76 Secur Dialogue, 77 Can J Polit Sci, 78 J Contemp Asia, 79 World Policy J, 80 Publius J Federalism, 81 Am Rev Public Adm, 82 Aust J Polit Sci, 83 Policy Stud J, 84 Alternatives, 85 Dados-Rev Cienc Soc, 86 Aust J Publ Admin, 87 Women Polit, 88 Aust J Int Aff, 89 Aust J Soc Issues, 90 Pac Aff, 91 Int Rev Adm Sci, 92 Can Public Admin, 93 Int J, 94 Polity, 95 Tidsskr Samfunnsfor, 96 Society, 97 J Baltic Stud, 98 Osteuropa, 99 Rev Etud Comp Est-O

## 17 Fluid Mechanics (1.1%)

1 J Fluid Mech, 2 Phys Fluids, 3 J Comput Phys, 4 Int J Heat Mass Tran, 5 Aiaa J, 6 Siam J Sci Comput, 7 Siam J Numer Anal, 8 J Comput Appl Math, 9 Linear Algebra Appl, 10 Combust Flame, 11 Math Comput, 12 Numer Math, 13 Annu Rev Fluid Mech, 14 Siam J Appl Math, 15 J Heat Trans-T Asme, 16 Siam J Matrix Anal A, 17 Exp Fluids, 18 Siam Rev, 19 J Fluid Eng-T Asme, 20 Int J Multiphas Flow, 21 Energ Convers Manage, 22 Int J Numer Meth Fl, 23 Inverse Probl, 24 J Aircraft, 25 Int J Heat Fluid Fl, 26 Appl Numer Math, 27 Math Mod Meth Appl S, 28 J Fluid Struct, 29 Energy, 30 Prog Energ Combust, 31 Appl Therm Eng, 32 Adv Comput Math, 33 J Propul Power, 34 Renew Energ, 35 Int J Refrig, 36 Sol Energy, 37 Exp Therm Fluid Sci, 38 Combust Sci Technol, 39 Comput Fluids, 40 Build Environ, 41 Esaim-Math Model Num, 42 Bit, 43 Acm T Math Software, 44 Numer Heat Tr A-Appl, 45 Fire Safety J, 46 Ima J Numer Anal, 47 Int Commun Heat Mass, 48 J Turbomach, 49 Computing, 50 Int J Therm Sci, 51 J Spacecraft Rockets, 52 Eur J Mech B-Fluid, 53 Combust Theor Model, 54 Int J Energ Res, 55 Prog Aersp Sci, 56 Energ Buildings, 57 Numer Algorithms, 58 J Eng Gas Turb Power, 59 Numer Linear Algebr, 60 Appl Energ, 61 Math Comput Simulat, 62 J Thermophys Heat Tr, 63 Numer Meth Part D E, 64 Heat Mass Transfer, 65 J Eng Math, 66 J Am Helicopter Soc, 67 Flow Turbul Combust, 68 Numer Heat Tr B-Fund, 69 Appl Math Model, 70 Atomization Spray, 71 Comput Sci Eng, 72 Fluid Dyn Res, 73 Energ Source, 74 Int J Comput Math, 75 J Electron Packaging, 76 HvacFr Res, 77 J Sol Energ-T Asme, 78 Theor Comp Fluid Dyn, 79 Fire Mater, 80 Heat Transfer Eng, 81 Ima J Appl Math, 82 J Enhanc Heat Transf, 83 Microscale Therm Eng, 84 Aersp Sci Technol, 85 Transport Theor Stat, 86 Jsme Int J B-Fluid T, 87 Aeronaut J, 88 Shock Waves, 89 J Ship Res, 90 Int J Numer Method H, 91 J Comput Math, 92 Flow Meas Instrum, 93 Geophys Astro Fluid, 94 P I Mech Eng A-J Pow, 95 Int J Comput Fluid D, 96 Fire Technol, 97 J Porous Media, 98 Exp Heat Transfer, 99 Combust Explo Shock+, 100 Int J Turbo Jet Eng, 101 Russ J Numer Anal M, 102 J Fire Sci, 103 J Energ Resour-Asme, 104 J I Energy, 105 T Jpn Soc Aeronaut S, 106 P I Mech Eng G-J Aer, 107 Microgravity Sci Tec

## 18 Medical Imaging (1.1%)

1 Radiology, 2 Int J Radiat Oncol, 3 Am J Roentgenol, 4 J Neurosurg, 5 Neurosurgery, 6 Magnet Reson Med, 7 Am J Neuroradiol, 8 J Nucl Med, 9 J Magn Reson Imaging, 10 Ieee T Med Imaging, 11 Eur Radiol, 12 Phys Med Biol, 13 Med Phys, 14 Radiother Oncol, 15 Radiographics, 16 Magn Reson Imaging, 17 J Vasc Interv Radiol, 18 J Comput Assist Tomo, 19 Neuroradiology, 20 Brit J Radiol, 21 J Neuro-Oncol, 22 Eur J Radiol, 23 Acta Neurochir, 24 Clin Radiol, 25 Invest Radiol, 26 Acad Radiol, 27 Nucl Med Biol, 28 J Ultras Med, 29 Surg Neurol, 30 Pediatr Radiol, 31 Acta Oncol, 32 Nmr Biomed, 33 Pediatr Neurosurg, 34 Radiol Clin N Am, 35 Skeletal Radiol, 36 Rofo-Fortschr Rontg, 37 Med

Image Anal, 38 Child Nerv Syst, 39 Acta Radiol, 40 Cancer J, 41 Nucl Med Commun, 42 Abdom Imaging, 43 Clin Nucl Med, 44 Cardiovasc Inter Rad, 45 Brit J Neurosurg, 46 J Nucl Cardiol, 47 Semin Radiat Oncol, 48 J Clin Neurosci, 49 Strahlenther Onkol, 50 Semin Nucl Med, 51 J Cardio Magn Reson, 52 J Clin Ultrasound, 53 Stereot Funct Neuros, 54 Neurosurg Clin N Am, 55 Ieee Eng Med Biol, 56 Neurol Med-Chir, 57 Int J Hyperther, 58 Minim Invas Neurosurg, 59 Comput Med Imag Grap, 60 Radiologe, 61 Cancer Biother Radio, 62 Clin Oncol-Uk, 63 Clin Imag, 64 Neuroimag Clin N Am, 65 J Digit Imaging, 66 Clin Neuropathol, 67 J Thorac Imag, 68 Ann Nucl Med, 69 Semin Ultrasound Ct, 70 Neurosurg Rev, 71 Neurol Surg Tokyo, 72 J Radiol, 73 Neurochirurgie, 74 Nuklearned-Nucl Med, 75 J Neuroradiology, 76 Interv Neuroradiol, 77 Semin Roentgenol, 78 Neurol India, 79 Ultraschall Med, 80 Can Assoc Radiol J, 81 Zbl Neurochir, 82 Neurosurg Quart, 83 Neurocirugia, 84 Riv Neuroradiol

## 19 Material Engineering (1.1%)

1 Int J Solids Struct, 2 Comput Method Appl M, 3 Int J Numer Meth Eng, 4 J Sound Vib, 5 J Mech Phys Solids, 6 J Struct Eng-Asce, 7 Compos Sci Technol, 8 Cement Concrete Res, 9 P Roy Soc A-Math Phy, 10 Comput Struct, 11 J Eng Mech-Asce, 12 Eng Fract Mech, 13 Eng Struct, 14 J Appl Mech-T Asme, 15 Compos Struct, 16 Int J Fracture, 17 Aci Struct J, 18 Compos Part A-Appl S, 19 Smart Mater Struct, 20 Int J Mech Sci, 21 Int J Plasticity, 22 Earthq Eng Struct D, 23 Int J Eng Sci, 24 Int J Fatigue, 25 Mech Mater, 26 Comput Mech, 27 J Constr Steel Res, 28 Int J Nonlinear Mech, 29 J Compos Mater, 30 Fatigue Fract Eng M, 31 Cement Concrete Comp, 32 Aci Mater J, 33 Mater Struct, 34 Eur J Mech A-Solid, 35 Acta Mech, 36 Mech Syst Signal Pr, 37 Compos Part B-Eng, 38 J Wind Eng Ind Aerod, 39 J Vib Acoust, 40 J Intel Mat Syst Str, 41 J Eng Mater-T Asme, 42 Int J Impact Eng, 43 Int J Pres Ves Pip, 44 Eng Anal Bound Elem, 45 Finite Elem Anal Des, 46 Wave Motion, 47 Z Angew Math Mech, 48 Nonlinear Dynam, 49 Can J Civil Eng, 50 Thin Wall Struct, 51 Struct Multidiscip O, 52 J Elasticity, 53 J Mater Civil Eng, 54 Mag Concrete Res, 55 Commun Numer Meth En, 56 Exp Mech, 57 Struct Saf, 58 J Therm Stresses, 59 Constr Build Mater, 60 Arch Appl Mech, 61 Mech Res Commun, 62 Struct Eng Mech, 63 Probabilist Eng Mech, 64 Theor Appl Fract Mec, 65 P I Mech Eng C-J Mec, 66 Cmes-Comp Model Eng, 67 Int Appl Mech+, 68 J Strain Anal Eng, 69 J Reinf Plast Comp, 70 J Vib Control, 71 J Press Vess-T Asme, 72 Eng Comput-Germany, 73 Q J Mech Appl Math, 74 Adv Eng Softw, 75 Int J Vehicle Des, 76 Continuum Mech Therm, 77 Pci J, 78 Eng Computation, 79 J Test Eval, 80 P I Civil Eng-Str B, 81 Acta Mech Sinica, 82 P I Mech Eng D-J Aut, 83 Mech Compos Mater, 84 Math Mech Solids, 85 Jsme Int J A-Solid M, 86 Ksme Int J, 87 Appl Math Mech-Engl, 88 Meccanica, 89 Appl Compos Mater, 90 Shock Vib, 91 Adv Cem Res, 92 P I Mech Eng F-J Rai, 93 Mater Sci Res Int, 94 Adv Compos Lett, 95 Acta Mech Solida Sin, 96 Sampe J, 97 J Chin Inst Eng, 98 Int J Mater Prod Tec, 99 Cement Concrete Aggr, 100 Sadhana-Acad P Eng S, 101 Forsch Ingenieurwes,

102 Eng Fail Anal, 103 J Aerospace Eng, 104 Adv Compos Mater, 105 Defence Sci J, 106 Sci Eng Compos Mater, 107 Eng J Aisc

## 20 Sociology (0.97%)

1 Am Sociol Rev, 2 Am J Sociol, 3 Annu Rev Sociol, 4 J Marriage Fam, 5 Soc Forces, 6 Demography, 7 Criminology, 8 Am Behav Sci, 9 Soc Probl, 10 Soc Psychol Quart, 11 Sociology, 12 Popul Dev Rev, 13 Soc Sci Quart, 14 Econ Soc, 15 Ethnic Racial Stud, 16 J Health Soc Behav, 17 Brit J Sociol, 18 Soc Sci Res, 19 Theor Cult Soc, 20 Theor Soc, 21 J Fam Issues, 22 J Sci Stud Relig, 23 Brit J Criminol, 24 Gender Soc, 25 Int Migr Rev, 26 Crime Delinquency, 27 Ann Am Acad Polit Ss, 28 J Quant Criminol, 29 J Res Crime Delinq, 30 Sociol Health Ill, 31 Work Occupation, 32 Pop Stud-J Demog, 33 Sociol Theor, 34 Soc Natur Resour, 35 Sociol Quart, 36 J Crim Just, 37 Sociol Rev, 38 Contemp Sociol, 39 Sociol Forum, 40 Sociol Relig, 41 Eur Sociol Rev, 42 Soc Networks, 43 Rural Sociol, 44 Disabil Soc, 45 Sociol Perspect, 46 Soc Polit, 47 Nonprof Volunt Sec Q, 48 Hum Stud, 49 J Contemp Ethnogr, 50 Inquiry, 51 Ageing Soc, 52 Symb Interact, 53 Hist Hum Sci, 54 Rev Relig Res, 55 Women Stud Int Forum, 56 J Comp Fam Stud, 57 Sociol Inq, 58 Eur J Popul, 59 Popul Res Policy Rev, 60 Kolner Z Soziol Soz, 61 Int Migr, 62 Deviant Behav, 63 J Law Soc, 64 Ration Soc, 65 Z Soziol, 66 Int Sociol, 67 Crime Law Social Ch, 68 Time Soc, 69 Childhood, 70 Policy Sci, 71 Acta Sociol, 72 Soc Legal Stud, 73 Arch Eur Sociol, 74 Population, 75 Int J Sociol Law, 76 Soc Anim, 77 J Black Stud, 78 Berl J Soziol, 79 Eur J Womens Stud, 80 Popul Environ, 81 Sociol Sport J, 82 Sci Soc Sante, 83 Aust Nz J Criminol, 84 Crim Law Rev, 85 Can Rev Soc Anthropol, 86 Can J Sociol, 87 Sociol Cas, 88 Anthrozoos, 89 Teach Sociol, 90 Sociol Spectrum, 91 Soz Welt, 92 Soc Sci J, 93 Desarrollo Econ, 94 Fed Probat, 95 Soc Compass, 96 J Psychohist

## 21 Probability & Statistics (0.87%)

1 J Am Stat Assoc, 2 Ann Stat, 3 J Roy Stat Soc B, 4 Biometrics, 5 Stat Med, 6 Biometrika, 7 J Stat Plan Infer, 8 Stoch Proc Appl, 9 Stat Probabil Lett, 10 Ann Probab, 11 Stat Sinica, 12 Ann Appl Probab, 13 Probab Theory Rel, 14 Bernoulli, 15 Stat Sci, 16 J Comput Graph Stat, 17 Scand J Stat, 18 Adv Appl Probab, 19 J Appl Probab, 20 J Multivariate Anal, 21 Comput Stat Data An, 22 Am Stat, 23 Technometrics, 24 Can J Stat, 25 Commun Stat-Theor M, 26 Queueing Syst, 27 J Roy Stat Soc C-App, 28 J Qual Technol, 29 Ann I Stat Math, 30 J Theor Probab, 31 Ann I H Poincare-Pr, 32 Sociol Method Res, 33 Stat Methods Med Res, 34 Stat Comput, 35 Theor Probab Appl+, 36 Int Stat Rev, 37 J Appl Stat, 38 J Roy Stat Soc A Sta, 39 Lifetime Data Anal, 40 Biometrical J, 41 Insur Math Econ, 42 Aust Nz J Stat, 43 Probab Eng Inform Sc, 44 Commun Stat-Simul C, 45 Metrika, 46 Stoch Anal Appl, 47 Brit J Math Stat Psy, 48 Environmetrics, 49 J Stat Comput Sim, 50 J Agr Biol Envir St, 51 Qual Reliab Eng Int, 52 Computation Stat, 53 Statistics, 54 Environ Ecol Stat,

55 Stat Neerl, 56 Stat Pap, 57 Qual Quant

## 22 Astronomy & Astrophysics (0.86%)

1 Astrophys J, 2 Astron Astrophys, 3 Mon Not R Astron Soc, 4 Astron J, 5 Astrophys J Suppl S, 6 Publ Astron Soc Pac, 7 Annu Rev Astron Astr, 8 Sol Phys, 9 Publ Astron Soc Jpn, 10 Astrophys Space Sci, 11 Iau Symp, 12 New Astron, 13 New Astron Rev, 14 Earth Moon Planets, 15 Acta Astronom, 16 Astron Nachr, 17 Astron Lett+, 18 Publ Astron Soc Aust, 19 Rev Mex Astron Astr, 20 Astron Rep+, 21 Exp Astron, 22 J Astrophys Astron, 23 Astron Geophys, 24 Chinese Astron Astr, 25 Observatory

## 23 Gastroenterology (0.80%)

1 Gastroenterology, 2 Hepatology, 3 Am J Gastroenterol, 4 Gut, 5 J Hepatol, 6 Am J Physiol-Gastr L, 7 Gastrointest Endosc, 8 Aliment Pharm Therap, 9 Digest Dis Sci, 10 Liver Transplant, 11 Scand J Gastroentero, 12 Endoscopy, 13 J Pediatr Gastr Nutr, 14 Hepato-Gastroenterol, 15 J Gastroen Hepatol, 16 Eur J Gastroen Hepat, 17 Semin Liver Dis, 18 J Clin Gastroenterol, 19 J Viral Hepatitis, 20 Inflamm Bowel Dis, 21 J Gastroenterol, 22 Pancreas, 23 Digestion, 24 Gastroenterol Clin N, 25 Neurogastroent Motil, 26 Digest Liver Dis, 27 Helicobacter, 28 Int J Colorectal Dis, 29 Can J Gastroenterol, 30 Intervirology, 31 Gastroen Clin Biol, 32 Hepatol Res, 33 Best Pract Res Cl Ga, 34 Z Gastroenterol, 35 Dis Esophagus, 36 Metab Brain Dis, 37 Digest Dis, 38 Acta Gastro-Ent Belg, 39 Curr Opin Gastroen, 40 Rev Esp Enferm Dig

## 24 Law (0.79%)

1 Yale Law J, 2 Harvard Law Rev, 3 Stanford Law Rev, 4 Columbia Law Rev, 5 Va Law Rev, 6 U Chicago Law Rev, 7 U Penn Law Rev, 8 Calif Law Rev, 9 Mich Law Rev, 10 New York U Law Rev, 11 Am J Int Law, 12 Tex Law Rev, 13 Vanderbilt Law Rev, 14 Northwest U Law Rev, 15 Georgetown Law J, 16 J Legal Stud, 17 Cornell Law Rev, 18 UCLA Law Rev, 19 Duke Law J, 20 Minn Law Rev, 21 Fordham Law Rev, 22 Law Soc Rev, 23 Iowa Law Rev, 24 Indiana Law J, 25 Notre Dame Law Rev, 26 South Calif Law Rev, 27 Boston U Law Rev, 28 U Illinois Law Rev, 29 Wisc Law Rev, 30 Bus Lawyer, 31 Harvard J Law Publ P, 32 George Wash Law Rev, 33 Law Social Inquiry, 34 Am Crim Law Rev, 35 Admin Law Rev, 36 U Cinci Law Rev, 37 Hastings Law J, 38 Harvard Int Law J, 39 Am J Comp Law, 40 Columbia J Trans Law, 41 Wash Law Rev, 42 J Crim Law Crim, 43 Buffalo Law Rev, 44 Antitrust Law J, 45 J Int Econ Law, 46 U Pitt Law Rev, 47 Harvard J Legis, 48 Am J Law Med, 49 J Copyright Soc Usa, 50 J Legal Educ, 51 Cornell Int Law J, 52 Ecol Law Quart, 53 Am Bus Law J, 54 U Pa J Int Econ Law, 55 Am Bankrupt Law J, 56 Common Mkt Law Rev, 57 Rutgers Law Rev, 58 Cathol U Law Rev, 59 Urban Lawyer, 60 Fam Law Quart, 61 Food Drug Law J, 62 Mil Law Rev, 63 Denver U

Law Rev, 64 Law Philos, 65 Law Libr J, 66 Nat Resour J, 67 Columbia J Law Soc P, 68 J Legal Med, 69 Iic-Int Rev Intell P, 70 Secur Regul Law J, 71 J Marit Law Commer

## 25 Chemical Engineering (0.77%)

1 Ind Eng Chem Res, 2 Chem Eng Sci, 3 J Catal, 4 Appl Catal A-Gen, 5 Catal Today, 6 J Membrane Sci, 7 Aiche J, 8 Appl Catal B-Environ, 9 Fuel, 10 Micropor Mesopor Mat, 11 Catal Lett, 12 Energ Fuel, 13 Powder Technol, 14 Thermochim Acta, 15 Fluid Phase Equilib, 16 Desalination, 17 J Chem Eng Data, 18 Comput Chem Eng, 19 Chem Eng J, 20 Stud Surf Sci Catal, 21 Sep Sci Technol, 22 Top Catal, 23 Sep Purif Technol, 24 J Anal Appl Pyrol, 25 Fuel Process Technol, 26 Chem Eng Res Des, 27 Miner Eng, 28 Hydrometallurgy, 29 Biomass Bioenerg, 30 J Chem Thermodyn, 31 J Phys Chem Ref Data, 32 J Supercrit Fluid, 33 Int J Miner Process, 34 Can J Chem Eng, 35 Chem Eng Technol, 36 Int J Thermophys, 37 J Chem Eng Jpn, 38 J Petrol Sci Eng, 39 J Solution Chem, 40 Chem Eng Process, 41 Ultrason Sonochem, 42 J Loss Prevent Proc, 43 Solvent Extr Ion Exc, 44 Chem Eng Prog, 45 Spe Reserv Eval Eng, 46 React Kinet Catal L, 47 Chem-Ing-Tech, 48 Process Saf Environ, 49 J Can Petrol Technol, 50 Kinet Catal+, 51 Korean J Chem Eng, 52 Chem Eng Commun, 53 J Porous Mat, 54 Petrol Sci Technol, 55 Process Saf Prog, 56 Kagaku Kogaku Ronbun, 57 Oil Shale, 58 Gold Bull, 59 Chem Eng-New York, 60 Phys Chem Liq, 61 Miner Metall Proc, 62 J S Afr I Min Metall, 63 Indian J Chem Techn, 64 Chem Pap-Chem Zvesti, 65 Particul Sci Technol, 66 Adv Powder Technol, 67 Filtr Separat, 68 Rev Chim-Bucharest, 69 J Chin Inst Chem Eng, 70 Inz Chem Procesowa, 71 Chinese J Chem Eng, 72 Przem Chem, 73 T I Min Metall C, 74 Chem Biochem Eng Q, 75 Petrol Chem+

## 26 Education (0.75%)

1 J Educ Psychol, 2 Am Educ Res J, 3 Phi Delta Kappan, 4 Educ Leadership, 5 Educ Psychol, 6 Read Res Quart, 7 J Res Sci Teach, 8 Sci Educ, 9 Educ Eval Policy An, 10 Teach Coll Rec, 11 Elem School J, 12 Int J Sci Educ, 13 Except Children, 14 Teach Teach Educ, 15 School Psychol Rev, 16 J School Psychol, 17 Cognition Instruct, 18 J Learn Sci, 19 J Teach Educ, 20 Contemp Educ Psychol, 21 J Learn Disabil-Us, 22 Sociol Educ, 23 Read Teach, 24 Harvard Educ Rev, 25 J Spec Educ, 26 Rem Spec Educ, 27 Brit J Sociol Educ, 28 J Adolesc Adult Lit, 29 Educ Psychol Rev, 30 Brit J Educ Psychol, 31 Learn Instr, 32 J Lit Res, 33 J Educ Res, 34 J Res Math Educ, 35 J Educ Policy, 36 Theor Pract, 37 Psychol Schools, 38 J Curriculum Stud, 39 School Psychol Quart, 40 Sch Eff Sch Improv, 41 Educ Urban Soc, 42 Urban Educ, 43 Early Child Res Q, 44 Top Early Child Spec, 45 J Emot Behav Disord, 46 High Educ, 47 Educ Policy, 48 Educ Admin Quart, 49 Anthropol Educ Quart, 50 Eur J Psychol Educ, 51 Comp Educ, 52 Oxford Rev Educ, 53 Res Teach Engl, 54 Brit J Educ Stud, 55 Educ Stud, 56 Curriculum Inq, 57 In-

str Sci, 58 J Exp Educ, 59 Comput Educ, 60 Educ Res-Uk, 61 Learn Disability Q, 62 J Early Intervention, 63 Int J Educ Dev, 64 J Philos Educ, 65 School Psychol Int, 66 Z Padagog Psychol, 67 J Moral Educ, 68 Z Padagogik, 69 Am Biol Teach, 70 Stud High Educ, 71 Comp Educ Rev, 72 Young Children, 73 Gifted Child Quart, 74 Am Ann Deaf, 75 EtrFd-Educ Tech Res, 76 Brit J Educ Technol, 77 Interv Sch Clin, 78 J Psychoeduc Assess, 79 J Biol Educ, 80 Infant Young Child, 81 J Comput Assist Lear, 82 J Educ Gifted, 83 J Educ Psychol Cons, 84 Educ Train Dev Disab, 85 Educ Rev, 86 Res Pract Pers Sev D

## 27 Telecommunication (0.68%)

1 Ieee T Inform Theory, 2 Ieee J Sel Area Comm, 3 P Ieee, 4 Ieee T Commun, 5 Ieee T Signal Proces, 6 Ieee Commun Mag, 7 Ieee Acn T Network, 8 Ieee Commun Lett, 9 Ieee Network, 10 Ieee T Veh Technol, 11 Comput Netw, 12 Signal Process, 13 Ieee T Aero Elec Sys, 14 Ieee Signal Proc Mag, 15 Ieee Spectrum, 16 Ieee Signal Proc Let, 17 Comput Commun, 18 Wirel Netw, 19 Perform Evaluation, 20 Eur T Telecommun, 21 Ieee T Consum Electr, 22 J High Speed Netw, 23 Bell Labs Tech J, 24 Iee P-Radar Son Nav, 25 Telecommun Syst, 26 Iee P-Commun, 27 Digit Signal Process, 28 Aeu-Int J Electron C, 29 Ieee T Broadcast, 30 Etri J, 31 Ann Telecommun, 32 Int J Commun Syst, 33 Ieee Aero El Sys Mag, 34 Comput Electr Eng, 35 Electron Comm Jpn 3, 36 Electron Comm Jpn 1, 37 Space Commun

## 28 Orthopedics (0.68%)

1 Spine, 2 Clin Orthop Relat R, 3 J Bone Joint Surg Am, 4 Arch Phys Med Rehab, 5 J Biomech, 6 Am J Sport Med, 7 J Bone Joint Surg Br, 8 J Orthop Res, 9 Arthroscopy, 10 J Arthroplasty, 11 Clin Biomech, 12 J Biomech Eng-T Asme, 13 Acta Orthop Scand, 14 Eur Spine J, 15 J Shoulder Elb Surg, 16 Ann Biomed Eng, 17 J Pediatr Orthoped, 18 Foot Ankle Int, 19 Phys Ther, 20 Knee Surg Sport Tr A, 21 Gait Posture, 22 Injury, 23 Am J Phys Med Rehab, 24 J Orthop Trauma, 25 Brit J Sport Med, 26 Brain Injury, 27 J Hand Surg-Am, 28 Spinal Cord, 29 Orthopedics, 30 Arch Orthop Traum Su, 31 Clin Rehabil, 32 J Electromyogr Kines, 33 Orthop Clin N Am, 34 J Hand Surg-Brit Eur, 35 Scand J Med Sci Spor, 36 J Orthop Sport Phys, 37 J Head Trauma Rehab, 38 Med Biol Eng Comput, 39 Med Eng Phys, 40 Clin Sport Med, 41 Int Orthop, 42 J Rehabil Res Dev, 43 Biorheology, 44 P I Mech Eng H, 45 J Athl Training, 46 Orthopade, 47 Unfallchirurg, 48 J Am Podiat Med Assn, 49 Rehabil Psychol, 50 Hand Clin, 51 Z Orthop Grenzgeb, 52 Am J Occup Ther, 53 Knee, 54 Rev Chir Orthop, 55 J Manip Physiol Ther, 56 Neurorehabilitation, 57 Neuropsychol Rehabil, 58 Physician Sportsmed, 59 J Occup Rehabil, 60 J Appl Biomech, 61 Int J Rehabil Res, 62 Prosthet Orthot Int, 63 Biomed Tech, 64 Sports Med Arthrosc, 65 Oper Techn Sport Med, 66 J Sport Rehabil, 67 Exp Techniques, 68 J Neurosurg-Spine, 69 Phys Med Rehab Kuror, 70 Isokinet Exerc Sci, 71 Curr Orthopaed,

## 29 Control Theory (0.64%)

1 Ieee T Automat Contr, 2 Automatica, 3 Ieee T Neural Networ, 4 Fuzzy Set Syst, 5 Siam J Control Optim, 6 Ieee T Robotic Autom, 7 Syst Control Lett, 8 Ieee T Fuzzy Syst, 9 Int J Control, 10 Ieee T Syst Man Cy B, 11 Int J Robot Res, 12 J Guid Control Dynam, 13 Ieee T Contr Syst T, 14 J Mech Design, 15 Int J Robust Nonlin, 16 J Dyn Syst-T Asme, 17 Ieee Contr Syst Mag, 18 Mech Mach Theory, 19 Iee P-Contr Theor Ap, 20 Inform Sciences, 21 Control Eng Pract, 22 Ieee T Syst Man Cy A, 23 Robot Auton Syst, 24 Int J Intell Syst, 25 Auton Robot, 26 Celest Mech Dyn Astr, 27 Ieee-Asme T Mech, 28 Lect Notes Contr Inf, 29 Robotica, 30 Int J Approx Reason, 31 Int J Syst Sci, 32 Ieee Robot Autom Mag, 33 J Process Contr, 34 Acta Astronaut, 35 J Robotic Syst, 36 Int J Uncertain Fuzz, 37 Mechatronics, 38 Ieee T Syst Man Cy C, 39 Math Control Signal, 40 Vehicle Syst Dyn, 41 J Astronaut Sci, 42 J Franklin I, 43 Int J Adapt Control, 44 Neural Process Lett, 45 Adv Robotics, 46 Control Cybern, 47 Automat Rem Contr+, 48 Int J Gen Syst, 49 Jsme Int J C-Mech Sy, 50 Multidim Syst Sign P, 51 Kybernetika, 52 Discrete Event Dyn S, 53 J Intell Robot Syst, 54 Ind Robot, 55 J Intell Fuzzy Syst, 56 Assembly Autom, 57 Math Probl Eng, 58 Neural Comput Appl, 59 Isa T, 60 Dynam Cont Dis Ser A, 61 P I Mech Eng I-J Sys, 62 Optim Contr Appl Met, 63 T Can Soc Mech Eng

## 30 Environmental Health (0.63%)

1 Environ Health Persp, 2 Toxicol Sci, 3 Drug Metab Dispos, 4 Toxicol Appl Pharm, 5 Toxicol Lett, 6 Toxicology, 7 Chem Res Toxicol, 8 Occup Environ Med, 9 Am J Ind Med, 10 Mutat Res-Gen Tox En, 11 J Occup Environ Med, 12 Food Chem Toxicol, 13 Scand J Work Env Hea, 14 Chem-Biol Interact, 15 Ergonomics, 16 Environ Res, 17 J Toxicol Env Health, 18 Risk Anal, 19 Int Arch Occ Env Hea, 20 J Occup Health, 21 J Expo Anal Env Epid, 22 Environ Mol Mutagen, 23 Arch Environ Health, 24 Arch Toxicol, 25 Xenobiotica, 26 Indoor Air, 27 Hum Exp Toxicol, 28 Appl Ergon, 29 Toxicol Pathol, 30 Int J Ind Ergonom, 31 Inhal Toxicol, 32 Mutagenesis, 33 Ann Occup Hyg, 34 Drug Metab Rev, 35 Work Stress, 36 Toxicol In Vitro, 37 Biol Trace Elem Res, 38 Reprod Toxicol, 39 Regul Toxicol Pharm, 40 Crit Rev Toxicol, 41 J Appl Toxicol, 42 Occup Med-Oxford, 43 Curr Drug Metab, 44 Safety Sci, 45 Biomarkers, 46 Ind Health, 47 J Biochem Mol Toxic, 48 Toxicol Ind Health, 49 Environment, 50 Environ Toxicol Phar, 51 J Safety Res, 52 Int J Hyg Envir Heal, 53 J Health Sci, 54 Atla-Altern Lab Anim, 55 Cell Biol Toxicol, 56 Polycycl Aromat Comp, 57 Ashrae J, 58 J Trace Elem Med Bio, 59 Exp Toxicol Pathol, 60 Int J Toxicol, 61 Drug Chem Toxicol, 62 Chem Ind-London, 63 Indoor Built Environ, 64 Eur J Drug Metab Ph, 65 Int J Environ Heal R, 66 Biomed Environ Sci, 67 Trace Elem Electroly, 68 Altex-Altern Tierexp, 69 Fluoride, 70 Med Probl Perform Ar, 71 Trav Humain, 72 J Toxicol-Cutan Ocul, 73 Acta Vet-

## 31 Operations Research (0.59%)

1 Eur J Oper Res, 2 Transport Res Rec, 3 Oper Res, 4 Math Program, 5 Siam J Optimiz, 6 Int J Prod Res, 7 Math Oper Res, 8 J Oper Res Soc, 9 Int J Prod Econ, 10 Transport Res B-Meth, 11 Transport Res A-Pol, 12 Comput Oper Res, 13 J Optimiz Theory App, 14 Iie Trans, 15 Accident Anal Prev, 16 Ann Oper Res, 17 Transport Sci, 18 Oper Res Lett, 19 J Transp Eng-Asce, 20 Omega-Int J Manage S, 21 Transport Res C-Emer, 22 Interfaces, 23 Inform J Comput, 24 Comput Optim Appl, 25 Comput Ind Eng, 26 Nav Res Log, 27 J Prod Anal, 28 Networks, 29 Transportation, 30 J Global Optim, 31 Comput Ind, 32 Math Method Oper Res, 33 Appl Math Opt, 34 J Heuristics, 35 J Transp Econ Policy, 36 Transport Res E-Log, 37 Optim Method Softw, 38 Res Eng Des, 39 Prod Plan Control, 40 Robot Cim-Int Manuf, 41 J Intell Manuf, 42 Transport Rev, 43 Int J Comput Integ M, 44 Ite J, 45 Eng Optimiz, 46 Numer Func Anal Opt, 47 Concurrent Eng-Res A, 48 J Manuf Syst, 49 Set-Valued Anal, 50 Transport Res D-Tr E, 51 Infor, 52 Cybernet Syst, 53 Or Spectrum, 54 Int J Flex Manuf Sys, 55 J Adv Transport, 56 Rairo-Oper Res, 57 J Navigation, 58 Ai Edam, 59 J Eng Design, 60 J Oper Res Soc Jpn, 61 Asia Pac J Oper Res, 62 P I Civil Eng-Transp

## 32 Ophthalmology (0.48%)

1 Invest Ophth Vis Sci, 2 Ophthalmology, 3 Am J Ophthalmol, 4 Arch Ophthalmol-Chic, 5 Brit J Ophthalmol, 6 J Cataract Refr Surg, 7 Exp Eye Res, 8 Cornea, 9 Graef Arch Clin Exp, 10 Surv Ophthalmol, 11 J Refract Surg, 12 Retina-J Ret Vit Dis, 13 Prog Retin Eye Res, 14 Eye, 15 Curr Eye Res, 16 Acta Ophthalmol Scan, 17 Optometry Vision Sci, 18 J Glaucoma, 19 Mol Vis, 20 Jpn J Ophthalmol, 21 J Aapos, 22 Clin Exp Ophthalmol, 23 Ophthalmologie, 24 Ophthal Physl Opt, 25 Eur J Ophthalmol, 26 Ophthal Plast Recon, 27 Klin Monatsbl Augenh, 28 Ophthalmologica, 29 J Ocul Pharmacol Th, 30 Ophthal Res, 31 J Pediat Ophth Strab, 32 Ocul Immunol Inflamm, 33 J Neuro-Ophthalmol, 34 J Fr Ophthalmol, 35 Can J Ophthalmol, 36 Neuro-Ophthalmology

## 33 Crop Science (0.47%)

1 Theor Appl Genet, 2 Crop Sci, 3 Phytopathology, 4 Plant Dis, 5 Genome, 6 Euphytica, 7 Plant Cell Rep, 8 Weed Sci, 9 Hortscience, 10 Pest Manag Sci, 11 Crop Prot, 12 Annu Rev Phytopathol, 13 Mol Breeding, 14 Eur J Plant Pathol, 15 J Am Soc Hortic Sci, 16 Plant Pathol, 17 Plant Breeding, 18 Weed Technol, 19 Plant Cell Tiss Org, 20 J Nematol, 21 Physiol Mol Plant P, 22 Sci Hortic-Amsterdam, 23 Plant Growth Regul, 24 Ann Appl Biol, 25 Can J Plant Sci, 26 Nematology, 27 Can J Plant Pathol, 28 Weed Res, 29 J Phytopathol, 30 Pestic Biochem Phys, 31 Biol Plantarum, 32 Hereditas,

33 In Vitro Cell Dev-Pl, 34 Seed Sci Technol, 35 Genet Resour Crop Ev, 36 Seed Sci Res, 37 Exp Agr, 38 Z Pflanzenk Pflanzen, 39 Phytoparasitica, 40 J Jpn Soc Hortic Sci, 41 Vitis, 42 Breeding Sci, 43 Australas Plant Path, 44 Genet Mol Biol, 45 Am J Potato Res, 46 Maydica, 47 Nematropica, 48 Bot Bull Acad Sinica, 49 Caryologia, 50 Cereal Res Commun, 51 New Zeal J Crop Hort, 52 Phytoprotection, 53 Trop Grasslands, 54 Soil Crop Sci Soc Fl, 55 Ber Landwirtschaft, 56 Acta Biol Cracov Bot, 57 J Plant Biochem Biot, 58 Trop Agr, 59 Pakistan J Bot, 60 Jarq-Jpn Agr Res Q, 61 Listy Cukrov

### **34 Geography (0.47%)**

1 Urban Stud, 2 Environ Plann A, 3 Int J Urban Regional, 4 Prog Hum Geog, 5 Reg Stud, 6 Ann Assoc Am Geogr, 7 Environ Plann D, 8 Antipode, 9 Polit Geogr, 10 T I Brit Geogr, 11 Geoforum, 12 Hous Policy Debate, 13 Int J Geogr Inf Sci, 14 Urban Aff Rev, 15 Prof Geogr, 16 Econ Geogr, 17 J Hist Geogr, 18 Area, 19 J Urban Aff, 20 J Am Plann Assoc, 21 Housing Stud, 22 J Rural Stud, 23 Sociol Ruralis, 24 Environ Plann B, 25 Urban Geogr, 26 Int Regional Sci Rev, 27 Pap Reg Sci, 28 Environ Plann C, 29 Rev Int Polit Econ, 30 Cities, 31 Ann Regional Sci, 32 Geogr Anal, 33 Growth Change, 34 Tijdschr Econ Soc Ge, 35 Eur Urban Reg Stud, 36 J Plan Educ Res, 37 Econ Dev Q, 38 Int Soc Sci J, 39 Environ Urban, 40 Can Geogr-Geogr Can, 41 Geogr Rev, 42 Habitat Int, 43 Land Use Policy, 44 Mt Res Dev, 45 Geogr J, 46 Aust Geogr, 47 Singapore J Trop Geo, 48 J Geogr Higher Educ, 49 Appl Geogr, 50 J Archit Plan Res, 51 J Urban Technol, 52 J Urban Plan D-Asce, 53 Geography, 54 Geogr Z, 55 Cartogr J, 56 Interdiscipl Sci Rev

### **35 Anthropology (0.45%)**

1 Am J Phys Anthropol, 2 Public Culture, 3 Curr Anthropol, 4 Am Ethnol, 5 Am Anthropol, 6 J Hum Evol, 7 J Archaeol Sci, 8 Cult Anthropol, 9 Annu Rev Anthropol, 10 Signs, 11 J S Afr Stud, 12 Am J Primatol, 13 Comp Stud Soc Hist, 14 Feminist Stud, 15 J Roy Anthropol Inst, 16 Int J Primatol, 17 Evol Anthropol, 18 Afr Affairs, 19 J Asian Stud, 20 Am Antiquity, 21 Hum Biol, 22 Africa, 23 Contemp Pacific, 24 Am J Hum Biol, 25 J Mod Afr Stud, 26 J Anthropol Archaeol, 27 Folia Primatol, 28 Hum Organ, 29 Oceania, 30 Primates, 31 Ann Hum Biol, 32 Glq-J Lesbian Gay St, 33 Hum Ecol, 34 Mod Asian Stud, 35 J Polynesian Soc, 36 J Afr Hist, 37 Crit Anthropol, 38 Archaeometry, 39 Identities-Glob Stud, 40 Lat Am Perspect, 41 Anthropol Quart, 42 J Peasant Stud, 43 Int J Osteoarchaeol, 44 Ethnohistory, 45 J Hist Sociol, 46 Cult Stud, 47 J Mat Cult, 48 Ethnology, 49 J Anthropol Res, 50 Bijdr Taal-Land-V, 51 Ann Anat, 52 Anthropologie, 53 Homme, 54 Frontiers, 55 Plains Anthropol, 56 Anthropol Sci, 57 Contrib Indian Soc, 58 J Gender Stud, 59 Collegium Antropol, 60 Anthropos, 61 Homo, 62 Arctic Anthropol

### **36 Veterinary (0.45%)**

1 Vet Rec, 2 Javma-J Am Vet Med A, 3 Vet Microbiol, 4 Am J Vet Res, 5 Vet Immunol Immunop, 6 Equine Vet J, 7 J Vet Intern Med, 8 Prev Vet Med, 9 J Vet Diagn Invest, 10 Avian Dis, 11 Vet Pathol, 12 J Vet Med Sci, 13 J Wildlife Dis, 14 Vet Surg, 15 J Small Anim Pract, 16 J Comp Pathol, 17 Avian Pathol, 18 Res Vet Sci, 19 Vet Clin N Am-Small, 20 Rev Sci Tech Oie, 21 Aust Vet J, 22 Vet Res, 23 Vet J, 24 Vet Radiol Ultrasoun, 25 J Vet Med B, 26 Can Vet J, 27 Comp Cont Educ Pract, 28 Berl Munch Tierarztl, 29 Vet Clin N Am-Equine, 30 Can J Vet Res, 31 J Vet Pharmacol Ther, 32 Vet Quart, 33 Acta Vet Scand, 34 Vet Dermatol, 35 Vet Hum Toxicol, 36 J Vet Med A, 37 J Zoo Wildlife Med, 38 Vet Clin N Am-Food A, 39 Deut Tierarztl Woch, 40 Vet Res Commun, 41 Vet Comp Orthopaed, 42 Schweiz Arch Tierh, 43 Tierarztl Prax, 44 New Zeal Vet J, 45 Equine Vet Educ, 46 Acta Vet Hung, 47 Clin Tech Small An P, 48 Wien Tierarztl Monat, 49 Prakt Tierarzt, 50 J Equine Vet Sci, 51 J Avian Med Surg, 52 Vet Med-Czech, 53 Comp Immunol Microb, 54 J Vet Med Educ, 55 Acta Vet Brno, 56 Tierarztl Umschau, 57 Semin Avian Exot Pet, 58 Vet Clin Path, 59 Vet Med-Us, 60 Kleintierpraxis, 61 Z Jagdwiss, 62 In Practice, 63 Pferdeheilkunde, 64 Rev Med Vet-Toulouse, 65 Med Weter, 66 Point Vet, 67 Prat Med Chir Anim, 68 Aust Vet Pract, 69 Vlaams Diergen Tijds, 70 Tijdschr Diergeneesk, 71 J Camel Pract Res, 72 B Vet I Pulawy, 73 Arch Med Vet, 74 Pesquisa Vet Brasil, 75 Irish Vet J, 76 Magy Allatorvosok, 77 Ann Med Vet

### **37 Computer Imaging (0.43%)**

1 Ieee T Pattern Anal, 2 Ieee T Image Process, 3 Pattern Recogn, 4 Int J Comput Vision, 5 Ieee T Circ Syst Vid, 6 Comput Vis Image Und, 7 Pattern Recogn Lett, 8 Image Vision Comput, 9 Comput Aided Design, 10 Acm T Graphic, 11 Ieee Comput Graph, 12 Ieee T Vis Comput Gr, 13 Comput Aided Geom D, 14 Comput Graph Forum, 15 Comput Graph-Uk, 16 Ieee Multimedia, 17 J Vis Commun Image R, 18 Signal Process-Image, 19 Presence-Teleop Virt, 20 J Math Imaging Vis, 21 Int J Pattern Recogn, 22 Visual Comput, 23 Multimedia Syst, 24 J Electron Imaging, 25 Pattern Anal Appl, 26 Iee P-Vis Image Sign, 27 Multimed Tools Appl, 28 Mach Vision Appl, 29 Int J Imag Syst Tech, 30 Real-Time Imaging, 31 Imaging Sci J

### **38 Agriculture (0.40%)**

1 J Dairy Sci, 2 J Anim Sci, 3 Theriogenology, 4 Poultry Sci, 5 Meat Sci, 6 Livest Prod Sci, 7 Int Dairy J, 8 Anim Genet, 9 Appl Anim Behav Sci, 10 Anim Reprod Sci, 11 Aust J Agr Res, 12 Anim Feed Sci Tech, 13 Anim Sci, 14 Brit Poultry Sci, 15 Aust J Exp Agr, 16 Domest Anim Endocrin, 17 Small Ruminant Res, 18 J Dairy Res, 19 Genet Sel Evol, 20 Can J Anim Sci, 21 Lait, 22 Reprod Fert Develop, 23 Asian Austral J Anim, 24 Milchwissenschaft, 25 Grass Forage Sci, 26 Reprod Domest Anim, 27 J Anim Breed Genet, 28 Anim Wel-

fare, 29 *Reprod Nutr Dev*, 30 *World Poultry Sci J*, 31 *Aust J Dairy Technol*, 32 *Rev Bras Zootecn*, 33 *J Anim Physiol An N*, 34 *Acta Agr Scand A-An*, 35 *Indian J Anim Sci*, 36 *Pesqui Agropecu Bras*, 37 *Arch Anim Nutr*, 38 *Arch Tierzucht*, 39 *Turk J Vet Anim Sci*, 40 *Indian Vet J*, 41 *J Anim Feed Sci*, 42 *Arch Geflugelkd*, 43 *Trop Anim Health Pro*, 44 *Zuchtungskunde*, 45 *Int J Dairy Technol*, 46 *Czech J Anim Sci*, 47 *S Afr J Anim Sci*, 48 *J Appl Anim Res*, 49 *Fleischwirtschaft*, 50 *Prod Anim*, 51 *J Muscle Foods*, 52 *Irish J Agr Food Res*, 53 *Outlook Agr*, 54 *Arq Bras Med Vet Zoo*, 55 *Wool Tech Sheep Bree*, 56 *Rev Cient-Fac Cien V*

### **39 Parasitology (0.37%)**

1 *Am J Trop Med Hyg*, 2 *Int J Parasitol*, 3 *J Parasitol*, 4 *Vet Parasitol*, 5 *T Roy Soc Trop Med H*, 6 *Trop Med Int Health*, 7 *Parasitology*, 8 *Trends Parasitol*, 9 *Dis Aquat Organ*, 10 *J Med Entomol*, 11 *J Eukaryot Microbiol*, 12 *Parasitol Res*, 13 *Acta Trop*, 14 *Mem I Oswaldo Cruz*, 15 *Ann Trop Med Parasit*, 16 *Exp Parasitol*, 17 *J Fish Dis*, 18 *Parasite Immunol*, 19 *Med Vet Entomol*, 20 *Fish Shellfish Immun*, 21 *Exp Appl Acarol*, 22 *J Am Mosquito Contr*, 23 *Protist*, 24 *Adv Parasit*, 25 *B Eur Assoc Fish Pat*, 26 *J Aquat Anim Health*, 27 *Eur J Protistol*, 28 *Folia Parasit*, 29 *J Helminthol*, 30 *Syst Parasitol*, 31 *Parasite*, 32 *Fish Pathol*, 33 *J Vector Ecol*, 34 *Acta Protozool*, 35 *Acta Parasitol*, 36 *Onderstepoort J Vet*, 37 *Helminthologia*, 38 *Arch Sci*

### **40 Dentistry (0.37%)**

1 *J Dent Res*, 2 *J Periodontol*, 3 *Oral Surg Oral Med O*, 4 *J Clin Periodontol*, 5 *Int J Oral Max Impl*, 6 *Clin Oral Implan Res*, 7 *J Oral Maxil Surg*, 8 *J Prosthet Dent*, 9 *Dent Mater*, 10 *J Am Dent Assoc*, 11 *Am J Orthod Dentofac*, 12 *J Oral Rehabil*, 13 *J Dent*, 14 *Arch Oral Biol*, 15 *J Endodont*, 16 *Oper Dent*, 17 *Int J Prosthodont*, 18 *Am J Dent*, 19 *Int J Oral Max Surg*, 20 *Eur J Oral Sci*, 21 *Int Endod J*, 22 *J Periodontal Res*, 23 *Brit Dent J*, 24 *Caries Res*, 25 *Periodontol 2PPP*, 26 *Community Dent Oral*, 27 *Crit Rev Oral Biol M*, 28 *Quintessence Int*, 29 *J Oral Pathol Med*, 30 *Angle Orthod*, 31 *Oral Microbiol Immun*, 32 *Int J Periodont Rest*, 33 *Eur J Orthodont*, 34 *Acta Odontol Scand*, 35 *Brit J Oral Max Surg*, 36 *J Cranio Maxill Surg*, 37 *Oral Dis*, 38 *J Orofac Pain*, 39 *J Public Health Dent*, 40 *Dentomaxillofac Rad*, 41 *Swed Dent J*, 42 *Cranio*, 43 *Aust Dent J*

### **41 Dermatology (0.34%)**

1 *J Am Acad Dermatol*, 2 *Brit J Dermatol*, 3 *Plast Reconstr Surg*, 4 *Arch Dermatol*, 5 *Ann Plas Surg*, 6 *Dermatol Surg*, 7 *Brit J Plast Surg*, 8 *Dermatology*, 9 *Laser Surg Med*, 10 *Int J Dermatol*, 11 *Clin Exp Dermatol*, 12 *Contact Dermatitis*, 13 *Acta Derm-Venereol*, 14 *Wound Repair Regen*, 15 *Burns*, 16 *Am J Dermatopath*, 17 *Cleft Palate-Cran J*, 18 *J Cutan Pathol*, 19 *Eur J Dermatol*, 20 *J Eur Acad Dermatol*, 21 *J*

*Craniofac Surg*, 22 *Cutis*, 23 *Pediatr Dermatol*, 24 *J Reconstr Microsurg*, 25 *J Burn Care Rehabil*, 26 *Microsurg*, 27 *Dermatol Clin*, 28 *Clin Plast Surg*, 29 *Ann Dermatol Vener*, 30 *Clin Dermatol*, 31 *Photodermatol Photo*, 32 *Aesthet Plast Surg*, 33 *Hautarzt*, 34 *Scand J Plast Recons*, 35 *Semin Cutan Med Surg*, 36 *J Clin Laser Med Sur*, 37 *Laser Med Sci*, 38 *Wounds*

### **42 Urology (0.32%)**

1 *J Urology*, 2 *Urology*, 3 *Bju Int*, 4 *Eur Urol*, 5 *J Endourol*, 6 *Int J Impot Res*, 7 *Neurourol Urodynam*, 8 *Urol Clin N Am*, 9 *Int Urogynecol J Pel*, 10 *Scand J Urol Nephrol*, 11 *World J Urol*, 12 *J Sex Marital Ther*, 13 *Int J Urol*, 14 *Urol Res*, 15 *Urol Int*, 16 *Prostate Cancer P D*, 17 *Andrologia*, 18 *Arch Andrology*, 19 *Prog Urol*, 20 *Urologe A*, 21 *Asian J Androl*, 22 *Ann Urol*, 23 *Aktuel Urol*

### **43 Rheumatology (0.32%)**

1 *Arth RheumOar C Res*, 2 *J Rheumatol*, 3 *Ann Rheum Dis*, 4 *Rheumatology*, 5 *Osteoarthr Cartilage*, 6 *Curr Opin Rheumatol*, 7 *Lupus*, 8 *Clin Exp Rheumatol*, 9 *Rheum Dis Clin N Am*, 10 *Scand J Rheumatol*, 11 *Semin Arthritis Rheu*, 12 *Clin Rheumatol*, 13 *Rheumatol Int*, 14 *Best Pract Res Cl Rh*, 15 *Joint Bone Spine*, 16 *Z Rheumatol*, 17 *J Musculoskelet Pain*, 18 *Jcr-J Clin Rheumatol*, 19 *Int J Tissue React*, 20 *Aktuel Rheumatol*

### **44 Applied Acoustics (0.30%)**

1 *J Acoust Soc Am*, 2 *J Speech Lang Hear R*, 3 *Hearing Res*, 4 *Ultrasound Med Biol*, 5 *Ieee T Ultrason Ferr*, 6 *Ieee T Speech Audi P*, 7 *Ultrasonics*, 8 *Ieee J Oceanic Eng*, 9 *Speech Commun*, 10 *Appl Psycholinguist*, 11 *Ear Hearing*, 12 *NdtFe Int*, 13 *Audiol Neuro-Otol*, 14 *Jaro-J Assoc Res Oto*, 15 *Int J Lang Comm Dis*, 16 *J Phonetics*, 17 *J Comput Acoust*, 18 *Appl Acoust*, 19 *Lang Speech Hear Ser*, 20 *J Commun Disord*, 21 *Clin Linguist Phonet*, 22 *Comput Speech Lang*, 23 *Mater Eval*, 24 *Insight*, 25 *J Audio Eng Soc*, 26 *Phonetica*, 27 *J Fluency Disord*, 28 *Acoust Phys+*, 29 *Ultrasonic Imaging*, 30 *Int J Aviat Psychol*, 31 *Top Lang Disord*, 32 *Phys Medica*, 33 *Mar Technol Soc J*, 34 *Noise Control Eng J*, 35 *Volta Rev*, 36 *J Nondestruct Eval*

### **45 Pharmacology (0.30%)**

1 *Biomaterials*, 2 *J Control Release*, 3 *Int J Pharm*, 4 *Pharm Res*, 5 *Adv Drug Deliver Rev*, 6 *J Pharm Sci-US*, 7 *J Pharm Pharmacol*, 8 *Tissue Eng*, 9 *Eur J Pharm Sci*, 10 *J Mater Sci-Mater M*, 11 *Eur J Pharm Biopharm*, 12 *J Biomat Sci-Polym E*, 13 *Annu Rev Biomed Eng*, 14 *Drug Dev Ind Pharm*, 15 *Pharmazie*, 16 *J Microencapsul*, 17 *J Drug Target*, 18 *Pharm Dev Technol*, 19 *Biopharm Drug Dispos*, 20 *Crit Rev Ther Drug*, 21 *Bio-Med Mater Eng*, 22 *Drug Deliv*, 23 *Artif Cell Blood Sub*, 24 *J Biomater Appl*, 25 *J Bioact Compat*

Pol, 26 Pda J Pharm Sci Tech, 27 Pharm Ind, 28 J Drug Deliv Sci Tec

## **46 Pathology (0.27%)**

1 Am J Surg Pathol, 2 Hum Pathol, 3 Modern Pathol, 4 Am J Clin Pathol, 5 J Clin Pathol, 6 Arch Pathol Lab Med, 7 Histopathology, 8 Virchows Arch, 9 Pathol Int, 10 Acta Cytol, 11 Diagn Cytopathol, 12 Cancer Cytopathol, 13 Int J Gynecol Pathol, 14 Pathol Res Pract, 15 Pediatr Devel Pathol, 16 Pathology, 17 Appl Immunohisto M M, 18 Semin Diagn Pathol, 19 Diagn Mol Pathol, 20 Adv Anat Pathol, 21 Anal Quant Cytol, 22 Ultrastruct Pathol, 23 Endocr Pathol, 24 Int J Surg Pathol, 25 Cytopathology, 26 Pathologie, 27 Ann Pathol, 28 J Histotechnol

## **47 History & Philosophy of Science (0.19%)**

1 Philos Sci, 2 Soc Stud Sci, 3 Stud Hist Philos Sci, 4 Am Math Mon, 5 Arch Hist Exact Sci, 6 Isis, 7 Brit J Philos Sci, 8 Biol Philos, 9 Hist Sci, 10 Sci Context, 11 Hist Math, 12 Osiris, 13 Am Sci, 14 Synthese, 15 Notes Rec Roy Soc, 16 Math Intell, 17 Brit J Hist Sci, 18 Technol Cult, 19 Hist Psychiatr, 20 Ann Sci, 21 Med Hist, 22 Mind Mach, 23 B Hist Med, 24 J Hist Biol, 25 Philos Soc Sci, 26 Soc Hist Med, 27 J Hist Behav Sci, 28 Minerva, 29 J Hist Med All Sci, 30 Hist Stud Phys Biol, 31 J Hist Sexuality, 32 Hist Phil Life Sci

## **48 Otolaryngology (0.19%)**

1 Laryngoscope, 2 Otolaryng Head Neck, 3 Arch Otolaryngol, 4 Ann Oto Rhinol Larynx, 5 Head Neck-J Sci Spec, 6 Acta Otolaryngol, 7 J Laryngol Otol, 8 Int J Pediatr Otorhi, 9 Otol Neurotol, 10 Otolaryng Clin N Am, 11 Eur Arch Oto-Rhino-L, 12 Am J Rhinol, 13 Clin Otolaryngol All, 14 J Voice, 15 Orl J Oto-Rhino-Lary, 16 Am J Otolaryng, 17 Dysphagia, 18 J Otolaryngol, 19 Folia Phoniater Logo, 20 Hno

## **49 Electromagnetic Engineering (0.18%)**

1 Ieee T Microw Theory, 2 Ieee T Antenn Propag, 3 Microw Opt Techn Let, 4 Ieee Microw Wirel Co, 5 Ieee Antennas Propag, 6 Ieee T Adv Packaging, 7 Ieee T Electromagn C, 8 Bioelectromagnetics, 9 Int J Rf Microw C E, 10 Iee P-Microw Anten P, 11 J Electromagnet Wave, 12 Int J Infrared Milli, 13 Microwave J, 14 Electromagnetics, 15 Int J Numer Model El, 16 Electr Eng, 17 Izv Vuz Radioelektr+

## **50 Information Science (0.17%)**

1 J Am Soc Inf Sci Tec, 2 Inform Process Manag, 3 Scientometrics, 4 Coll Res Libr, 5 J Doc, 6 J Inf Sci, 7 J Acad Libr, 8 Libr Trends, 9 Libr Inform Sci Res, 10 Gov Inform Q,

11 Learn Publ, 12 Ref User Serv Q, 13 Libri, 14 Libr Quart, 15 Aslib Proc, 16 Inform Technol Libr, 17 Libr Resour Tech Ser, 18 J Libr Inf Sci, 19 Electron Libr, 20 J Gov Inform, 21 Knowl Organ, 22 Z Bibl Bibl, 23 Interlend Doc Supply

## **51 Circuits (0.17%)**

1 Ieee J Solid-St Circ, 2 Ieee T Circuits-I, 3 Ieee T Circuits-II, 4 Ieee T Comput Aid D, 5 Ieee T Vlsi Syst, 6 Ieee Des Test Comput, 7 Int J Electron, 8 J Vlsi Sig Proc Syst, 9 Int J Circ Theor App, 10 Integration, 11 Analog Integr Circ S, 12 J Electron Test, 13 Circ Syst Signal Pr, 14 Frequenz, 15 J Circuit Syst Comp, 16 Electron World

## **52 Media & Communication (0.16%)**

1 J Commun, 2 Journalism Mass Comm, 3 Polit Commun, 4 Commun Res, 5 Hum Commun Res, 6 Commun Monogr, 7 J Broadcast Electron, 8 Sci Technol Hum Val, 9 Harv Int J PressOpol, 10 Commun Theor, 11 Media Cult Soc, 12 Writ Commun, 13 Inform Soc, 14 J Lang Soc Psychol, 15 Public Underst Sci, 16 Telecommun Policy, 17 Eur J Commun, 18 Int J Public Opin R, 19 Q J Speech, 20 Sci Commun, 21 Tech Commun, 22 J Bus Tech Commun, 23 J Media Econ, 24 Public Relat Rev

## **53 Power Systems (0.16%)**

1 Ieee T Power Syst, 2 Ieee T Ind Electron, 3 Ieee T Ind Appl, 4 Ieee T Power Electr, 5 Ieee T Power Deliver, 6 Ieee T Energy Conver, 7 Ieee T Dielect El In, 8 Iee P-Elect Pow Appl, 9 Iee P-Gener Transm D, 10 Int J Elec Power, 11 J Electrostat, 12 Electr Pow Syst Res, 13 Ieee T Educ, 14 Eur T Electr Power, 15 Kunstst-Plast Eur, 16 Ieee Electr Insul M, 17 Int J Elec Eng Educ, 18 Electr Eng Jpn

## **54 Tribology (0.16%)**

1 J Mater Process Tech, 2 Wear, 3 Int J Mach Tool Manu, 4 J Manuf Sci E-T Asme, 5 Cirp Ann-Manuf Techn, 6 J Tribol-T Asme, 7 Tribol Int, 8 Int J Adv Manuf Tech, 9 Tribol T, 10 Tribol Lett, 11 P I Mech Eng B-J Eng, 12 Mater Design, 13 P I Mech Eng J-J Eng, 14 Mach Sci Technol, 15 J Jpn Soc Tribologis, 16 Tribol Lubr Technol

## **55 History (0.15%)**

1 J Econ Hist, 2 Am Hist Rev, 3 J Am Hist, 4 Econ Hist Rev, 5 Slavic Rev, 6 Environ Hist, 7 Explor Econ Hist, 8 J Mod Hist, 9 Past Present, 10 Continuity Change, 11 Bus Hist, 12 J Urban Hist, 13 J Fam Hist, 14 Labor Hist, 15 Int Rev Soc Hist, 16 J Soc Hist, 17 Soc Sci Hist, 18 J Interdiscipl Hist, 19 Agr Hist, 20 Endeavour, 21 E Eur Quart, 22 Crit Rev, 23 J Sport Hist



## **56 Geotechnology (0.14%)**

1 J Geotech Geoenviron, 2 Geotechnique, 3 Can Geotech J, 4 Int J Numer Anal Met, 5 Int J Rock Mech Min, 6 Eng Geol, 7 Soil Dyn Earthq Eng, 8 Geotech Test J, 9 P I Civil Eng-Geotec, 10 Geotext Geomembranes, 11 Geosynth Int, 12 Comput Geotech, 13 Tunn Undergr Sp Tech, 14 Rock Mech Rock Eng, 15 Q J Eng Geol Hydroge, 16 P I Civil Eng-Civ En

## **57 Wood Products (0.12%)**

1 Holzforschung, 2 J Pulp Pap Sci, 3 Nord Pulp Pap Res J, 4 Forest Prod J, 5 Pap Puu-Pap Tim, 6 Appita J, 7 Wood Fiber Sci, 8 J Wood Sci, 9 Wood Sci Technol, 10 Cellulose, 11 Holz Roh Werkst, 12 J Wood Chem Technol, 13 Pulp Pap-Canada, 14 Iawa J, 15 Mokuzai Gakkaishi, 16 Wochenbl Papierfabr, 17 Cell Chem Technol, 18 Restaurator

## **58 Radiation (0.10%)**

1 Radiat Res, 2 Int J Radiat Biol, 3 Appl Radiat Isotopes, 4 Radiat Prot Dosim, 5 J Radioanal Nucl Ch, 6 Health Phys, 7 J Environ Radioactiv, 8 Radiochim Acta, 9 Radiat Environ Bioph, 10 J Radiat Res, 11 P I Mech Eng E-J Pro, 12 Kerntechnik, 13 Nucl Energ-J Br Nucl

## **59 Linguistics (0.093%)**

1 J Pragmatics, 2 Discourse Soc, 3 Lang Soc, 4 Mod Lang J, 5 Tesol Quart, 6 Appl Linguist, 7 Res Lang Soc Interac, 8 Aphasiology, 9 Lang Learn, 10 Lang Commun, 11 Can Mod Lang Rev, 12 Foreign Lang Ann, 13 Am Speech

## **60 Social Work (0.079%)**

1 Soc Work, 2 Fam Soc-J Contemp H, 3 Child Youth Serv Rev, 4 Soc Serv Rev, 5 Res Social Work Prac, 6 Soc Work Res, 7 Brit J Soc Work, 8 J Soc Work Educ, 9 Soc Work Health Care, 10 Health Soc Work, 11 Juvenile Fam Court J, 12 Affilia J Wom Soc Wo, 13 Int Soc Work, 14 Smith Coll Stud Soc, 15 Clin Soc Work J, 16 Admin Soc Work, 17 J Soc Serv Res

## **61 Psychoanalysis (0.077%)**

1 J Am Psychoanal Ass, 2 Int J Psychoanal, 3 Psychoanal Quart, 4 Psychoanal Inq, 5 Psychoanal Psychol, 6 Psyche-Z Psychoanal, 7 Contemp Psychoanal, 8 Forum Psychoanal, 9 J Anal Psychol

## **62 Middle Eastern Studies (0.073%)**

1 Int J Middle E Stud, 2 New Left Rev, 3 Middle Eastern Stud, 4 Middle East J, 5 Mon Rev, 6 Sci Soc, 7 Race Class

## **63 Forensic Science (0.067%)**

1 Forensic Sci Int, 2 J Forensic Sci, 3 Int J Legal Med, 4 J Anal Toxicol, 5 Am J Foren Med Path, 6 Med Sci Law, 7 Sci Justice, 8 Kriminalistik

## **64 Transfusion (0.066%)**

1 Transfusion, 2 Vox Sang, 3 Syst Dynam Rev, 4 Transfusion Med, 5 Syst Res Behav Sci, 6 Transfus Med Rev, 7 Syst Pract Act Res, 8 Biologicals, 9 Kybernetes, 10 J Clin Apheresis, 11 Transfus Clin Biol

## **65 Mycology (0.055%)**

1 Mycol Res, 2 Mycologia, 3 Mycotaxon, 4 Lichenologist, 5 Sydowia, 6 Persoonia, 7 Cryptogamie Mycol, 8 Mikol Fitopatol

## **66 Nuclear Energy (0.055%)**

1 Nucl Eng Des, 2 Ann Nucl Energy, 3 Nucl Technol, 4 J Nucl Sci Technol, 5 Nucl Sci Eng, 6 Prog Nucl Energ, 7 J Atom Energ Soc Jpn, 8 Atw-Int J Nucl Power

## **67 offshore Engineering (0.036%)**

1 Coast Eng, 2 Ocean Eng, 3 J Waterw Port C-Asce, 4 Appl Ocean Res, 5 J Offshore Mech Arct, 6 Mar Technol Sname N, 7 Nav Eng J

## **68 Environmental Ethics (0.034%)**

1 Ethics, 2 Soc Philos Policy, 3 Environ Ethics, 4 Environ Value, 5 J Agr Environ Ethic

## **69 Insect Taxonomy (0.033%)**

1 P Entomol Soc Wash, 2 Entomol News, 3 T Am Entomol Soc, 4 J New York Entomol S, 5 Pan-Pac Entomol, 6 Orient Insects

## **70 Higher Education (0.028%)**

1 J Coll Student Dev, 2 Res High Educ, 3 J High Educ, 4 Rev High Educ

### **71 Refineries (0.024%)**

1 Oil Gas J, 2 Hydrocarb Process, 3 Neft Khoz

### **72 Reliability Engineering (0.023%)**

1 Reliab Eng Syst Safe, 2 Ieee T Reliab, 3 P Rel Maint S

### **73 Other (0.023%)**

1 J Leisure Res, 2 Leisure Sci, 3 J Am Leather Chem As, 4 J Soc Leath Tech Ch, 5 J Sci Ind Res India

### **74 Civil Engineering (0.022%)**

1 J Comput Civil Eng, 2 J Constr Eng M Asce, 3 Build Res Inf, 4 J Surv Eng-Asce, 5 J Prof Iss Eng Ed Pr

### **75 Lab Veterinary (0.017%)**

1 Lab Anim-Uk, 2 Comparative Med, 3 Contemp Top Lab Anim, 4 Lab Animal, 5 Scand J Lab Anim Sci

### **76 Music (0.017%)**

1 Music Percept, 2 J New Music Res, 3 Comput Music J

### **77 Tourism (0.017%)**

1 Ann Tourism Res, 2 Tourism Manage

### **78 Textiles (0.015%)**

1 Text Res J, 2 Sen-I Gakkaishi, 3 Indian J Fibre Text, 4 Tekstil

### **79 Creativity Research (0.014%)**

1 Creativity Res J, 2 J Creative Behav

### **80 Travel Sociology (0.012%)**

1 Sociol Trav, 2 Rev Fr Sociol, 3 Mouvement Soc

### **81 Medical Informatics (0.011%)**

1 Comput Meth Prog Bio, 2 Comput Biol Med, 3 Meas Control-Uk

### **82 Leprosy (0.011%)**

1 Leprosy Rev, 2 Int J Leprosy

### **83 Sociology (Russian) (0.011%)**

1 Psikhoh Zh, 2 Vop Psikhoh+, 3 Sotsiol Issled+

### **84 Cryobiology (0.010%)**

1 Cryobiology, 2 Cryoletters

### **85 Death Studies (0.0095%)**

1 Death Stud, 2 Omega-J Death Dying

### **86 Rehabilitation Counseling (0.0074%)**

1 Rehabil Couns Bull, 2 J Rehabil

### **87 Steel (0.0072%)**

1 Steel Res Int, 2 Stahl Eisen

### **88 Futurist (0.0030%)**

1 Futurist

## **Fields of social science**

### **1 Economics (19%)**

1 Am Econ Rev, 2 Q J Econ, 3 J Financ, 4 Econometrica, 5 J Polit Econ, 6 J Financ Econ, 7 Econ J, 8 J Econ Perspect, 9 J Econometrics, 10 J Monetary Econ, 11 Rev Econ Stat, 12 Rev Econ Stud, 13 J Econ Lit, 14 Eur Econ Rev, 15 J Int Econ, 16 Rev Financ Stud, 17 J Econ Theory, 18 J Public Econ, 19 World Dev, 20 Rand J Econ, 21 J Health Econ, 22 J Labor Econ, 23 J Hum Resour, 24 J Dev Econ, 25 Int Econ Rev, 26 Econ Lett, 27 J Bus Econ Stat, 28 J Econ Behav Organ, 29 J Urban Econ, 30 J Financ Quant Anal, 31 Ind Labor Relat Rev, 32 Game Econ Behav, 33 J Law Econ Organ, 34 Natl Tax J, 35 J Bus, 36 J Money Credit Bank, 37 J Law Econ, 38 Economet Theor, 39 J Econ Growth, 40 Am J Agr Econ, 41 J Dev Stud, 42 World Bank Econ Rev, 43 J Bank Financ, 44 J Appl Econom, 45 J Environ Econ Manag, 46 Public Choice, 47 J Account Econ, 48 Ecol Econ, 49 Int J Ind Organ, 50 Econ Theor, 51 Can J Econ, 52 Appl Econ, 53 Brookings Pap Eco Ac, 54 J Risk Uncertainty, 55 J Accounting Res, 56 Health Econ, 57 J Econ Dyn Control, 58 Econ Inq, 59 Ind Relat, 60 Oxford B Econ Stat, 61 J Ind Econ, 62 Econ Educ Rev, 63 South Econ J, 64 J Policy Anal Manag, 65 Reg Sci

Urban Econ, 66 J Econ Manage Strat, 67 J Int Money Financ, 68 Soc Choice Welfare, 69 Land Econ, 70 Oxford Econ Pap, 71 Economica, 72 Energ Policy, 73 Econ Dev Cult Change, 74 Account Rev, 75 J Comp Econ, 76 Math Financ, 77 Scand J Econ, 78 Cambridge J Econ, 79 Mon Labor Rev, 80 Oxford Rev Econ Pol, 81 Math Soc Sci, 82 World Econ, 83 Financ Manage, 84 J Popul Econ, 85 J Math Econ, 86 Environ Resour Econ, 87 Int J Game Theory, 88 Energy J, 89 J Financ Intermed, 90 Econ Transit, 91 Int Tax Public Finan, 92 Rev Ind Organ, 93 J Prod Anal, 94 Small Bus Econ, 95 Energ Econ, 96 Theor Decis, 97 Resour Energy Econ, 98 Agr Econ, 99 J Econ Psychol, 100 J Labor Res, 101 Real Estate Econ, 102 Kyklos, 103 Macroecon Dyn, 104 Int J Forecasting, 105 Scot J Polit Econ, 106 J Forecasting, 107 J Econ Educ, 108 Int Rev Law Econ, 109 J Real Estate Financ, 110 Appl Econ Lett, 111 J Afr Econ, 112 J Econ, 113 J Regul Econ, 114 Eur Rev Agric Econ, 115 J Portfolio Manage, 116 J Futures Markets, 117 J Jpn Int Econ, 118 J Inst Theor Econ, 119 J Risk Insur, 120 J Hous Econ, 121 Food Policy, 122 J Econ Issues, 123 Can Public Pol, 124 China Econ Rev, 125 J Agr Econ, 126 Int Labour Rev, 127 Econ Philos, 128 J Policy Model, 129 J Macroecon, 130 Jpn World Econ, 131 Contemp Econ Policy, 132 Am J Econ Sociol, 133 Relat Ind-Ind Relat, 134 J Roy Stat Soc A Sta, 135 J Evol Econ, 136 Econ Model, 137 Econ Rec, 138 S Afr J Econ, 139 Auditing-J Pract Th, 140 Insur Math Econ, 141 Int J Manpower, 142 B Indones Econ Stud, 143 J Post Keynesian Ec, 144 Economist-Netherlands, 145 Aust J Agr Resour Ec, 146 Eastern Eur Econ, 147 Polit Ekon, 148 Jahrb Natl Stat, 149 Dev Econ, 150 Betrieb Forsch Prax, 151 Resour Policy, 152 Open Econ Rev, 153 Ekon Cas, 154 Can J Dev Stud, 155 Trimest Econ

## 2 Psychology (18%)

1 J Pers Soc Psychol, 2 Child Dev, 3 Am Psychol, 4 Psychol Bull, 5 Psychol Sci, 6 Pers Soc Psychol B, 7 Psychol Rev, 8 Dev Psychol, 9 J Exp Psychol Learn, 10 Trends Cogn Sci, 11 Cognition, 12 Annu Rev Psychol, 13 J Exp Psychol Human, 14 Neuropsychologia, 15 Mem Cognition, 16 J Cognitive Neurosci, 17 Psychon B Rev, 18 Pers Individ Differ, 19 J Mem Lang, 20 Behav Brain Sci, 21 J Exp Psychol Gen, 22 Percept Psychophys, 23 J Exp Soc Psychol, 24 Psychophysiology, 25 Psychol Aging, 26 J Pers, 27 Cognitive Psychol, 28 Organ Behav Hum Dec, 29 Brain Lang, 30 Cognition Emotion, 31 J Soc Issues, 32 Q J Exp Psychol-A, 33 J Exp Child Psychol, 34 Curr Dir Psychol Sci, 35 J Appl Soc Psychol, 36 Eur J Soc Psychol, 37 Pers Soc Psychol Rev, 38 J Fam Psychol, 39 Psychol Rep, 40 Psychol Inq, 41 Sex Roles, 42 Neuropsychology, 43 Brain Cognition, 44 J Cross Cult Psychol, 45 Acta Psychol, 46 Perception, 47 Cognitive Sci, 48 Lang Cognitive Proc, 49 J Res Pers, 50 Evol Hum Behav, 51 Appl Cognitive Psych, 52 Biol Psychol, 53 Cogn Neuropsychol, 54 Soc Dev, 55 Vis Cogn, 56 Memory, 57 Eur J Personality, 58 Behav Res Meth Ins C, 59 Int J Behav Dev, 60 Intelligence, 61 J Adolescence, 62 Psychol Res-Psych Fo, 63 Cognitive Dev, 64 J Youth Adolescence, 65 Int J Psychophysiol, 66 Brit J Soc Psychol, 67 J

Clin Exp Neuropsych, 68 J Math Psychol, 69 Percept Motor Skill, 70 Soc Cognition, 71 J Psycholinguist Res, 72 Pers Relationship, 73 Brit J Dev Psychol, 74 J Adolescent Res, 75 J Soc Psychol, 76 Psychol Women Quart, 77 Dev Neuropsychol, 78 Brit J Psychol, 79 J Exp Psychol-Appl, 80 Infant Behav Dev, 81 J Soc Clin Psychol, 82 Adolescence, 83 J Soc Pers Relat, 84 J Res Adolescence, 85 Merrill Palmer Quart, 86 J Behav Decis Making, 87 Inf Mental Hlth J, 88 J Child Lang, 89 J Early Adolescence, 90 J Motor Behav, 91 Dev Rev, 92 Conscious Cogn, 93 Eur J Cogn Psychol, 94 Basic Appl Soc Psych, 95 Aggressive Behav, 96 Can J Exp Psychol, 97 J Psychol, 98 Int J Psychol, 99 J Appl Dev Psychol, 100 Motiv Emotion, 101 Soc Indic Res, 102 Arch Clin Neuropsych, 103 Scand J Psychol, 104 Int J Intercult Rel, 105 Am J Psychol, 106 J Consciousness Stud, 107 Discourse Process, 108 Hum Nature-Int Bios, 109 Theor Psychol, 110 Hum Dev, 111 Risk Anal, 112 Hum Movement Sci, 113 J Genet Psychol, 114 Mind Lang, 115 J Nonverbal Behav, 116 J Neurolinguist, 117 Ethos, 118 Anxiety Stress Copin, 119 Aging Neuropsychol C, 120 Spatial Vision, 121 Soc Behav Personal, 122 Lang Speech, 123 Ann Psychol, 124 Can J Behav Sci, 125 New Ideas Psychol, 126 Eur J Psychol Assess, 127 J Gen Psychol, 128 Music Percept, 129 J Theor Soc Behav, 130 Teach Psychol, 131 Ecol Psychol, 132 Fem Psychol, 133 Genet Soc Gen Psych, 134 J Community Appl Soc, 135 J Psychophysiol, 136 Psychol Belg, 137 Cult Psychol, 138 Psychologist, 139 J Psychol Theol, 140 J Adult Dev, 141 Cah Psychol Cogn, 142 Curr Psychol, 143 Psicothema, 144 Soc Sci Inform, 145 Philos Psychol, 146 Aust J Psychol, 147 Zygon, 148 Swiss J Psychol, 149 Ethics Behav, 150 Z Entwickl Padagogis, 151 Comput Linguist, 152 Humor, 153 Psychol Rundsch, 154 Z Sozialpsychol, 155 Psychologia, 156 J Relig Health, 157 J Mind Behav, 158 Z Psychol, 159 J Humanist Psychol, 160 J Parapsychol, 161 J Constr Psychol, 162 Cesk Psychol, 163 Stud Psychol, 164 New Zeal J Psychol, 165 Rev Lat Am Psicol

## 3 Psychiatry (16%)

1 Am J Psychiat, 2 Arch Gen Psychiat, 3 J Consult Clin Psych, 4 Brit J Psychiat, 5 J Am Acad Child Psy, 6 J Clin Psychiat, 7 Psychol Med, 8 J Abnorm Psychol, 9 Schizophr Res, 10 J Child Psychol Psc, 11 Addiction, 12 Psychiat Serv, 13 Acta Psychiat Scand, 14 Behav Res Ther, 15 Dev Psychopathol, 16 J Affect Disorders, 17 Health Psychol, 18 Psychosom Med, 19 J Stud Alcohol, 20 Schizophrenia Bull, 21 J Nerv Ment Dis, 22 J Psychosom Res, 23 Int J Eat Disorder, 24 J Abnorm Child Psych, 25 Psychiat Res, 26 Clin Psychol Rev, 27 Addict Behav, 28 Psychol Assessment, 29 Soc Psych Psych Epid, 30 Clin Psychol-Sci Pr, 31 J Subst Abuse Treat, 32 J Trauma Stress, 33 Int J Geriatr Psych, 34 J Clin Psychol, 35 Psychol Addict Behav, 36 Am J Geriat Psychiat, 37 Aust Nz J Psychiat, 38 Child Abuse Neglect, 39 Compr Psychiat, 40 Ann Behav Med, 41 J Interpers Violence, 42 J Autism Dev Disord, 43 Cognitive Ther Res, 44 Psychosomatics, 45 Gen Hosp Psychiat, 46 Psychother Psychosom, 47 Prof Psychol-Res Pr, 48 Subst Use Misuse, 49 Psychiat Clin N Am, 50 J Psychiat

Res, 51 Behav Genet, 52 Psycho-Oncol, 53 Depress Anxiety, 54 Am J Drug Alcohol Ab, 55 J Pers Assess, 56 Exp Clin Psychopharm, 57 Behav Ther, 58 Psychol Health, 59 J Pers Disord, 60 J Anxiety Disord, 61 Eur Psychiat, 62 J Am Coll Health, 63 Am J Orthopsychiat, 64 Suicide Life-Threat, 65 Brit J Clin Psychol, 66 J Pediatr Psychol, 67 Crim Justice Behav, 68 J Behav Med, 69 Child Adol Psych Cl, 70 Community Ment Hlt J, 71 Psychiatry, 72 J Dev Behav Pediatr, 73 Eur Child Adoles Psy, 74 J Drug Issues, 75 J Psychoactive Drugs, 76 Behav Sci Law, 77 Aggress Violent Beh, 78 Am J Addiction, 79 Assessment, 80 Int Psychogeriatr, 81 Harvard Rev Psychiat, 82 Psychother Res, 83 J Fam Violence, 84 Int J Soc Psychiatr, 85 Alcohol Res Health, 86 Eur Eat Disord Rev, 87 Curr Opin Psychiatr, 88 J Psychiatr Neurosci, 89 J Psychopathol Behav, 90 Psychopathology, 91 Int J Law Psychiat, 92 Drug Alcohol Rev, 93 Int Rev Psychiatr, 94 Int J Psychiat Med, 95 Brit J Health Psych, 96 Psychiatr Rehabil J, 97 Psychiat Ann, 98 J Am Acad Psychiatry, 99 J Addict Dis, 100 Int J Behav Med, 101 Clin Psychol Psychot, 102 Int J Offender Ther, 103 Psychiat Quart, 104 Nord J Psychiat, 105 Psychother Psych Med, 106 Psychiat Prax, 107 J Child Adoles Subst, 108 J Behav Ther Exp Psy, 109 J Psychosoc Oncol, 110 Eur Addict Res, 111 Child Psychiat Hum D, 112 J Psychosom Obst Gyn, 113 B Menninger Clin, 114 J Drug Educ, 115 J Ect, 116 Diagnostica, 117 Adm Policy Ment Hlth, 118 Hist Psychiatr, 119 Psychotherapeut, 120 Z Psychosom Med Psc, 121 Behav Change, 122 Behav Med, 123 Aust Psychol, 124 J Clin Psychol Med S, 125 Israel J Psychiat, 126 Arch Psychiat Nurs, 127 Child Fam Behav Ther, 128 Drug-Educ Prev Polic, 129 Int J Group Psychoth, 130 Z Kl Psych Psychoth, 131 Can Psychol, 132 Appl Psychophys Biof, 133 Z Kinder Jug-Psych, 134 Verhaltenstherapie, 135 Child Health Care, 136 Salud Ment, 137 Eur J Psychiat, 138 Prax Kinderpsychol K, 139 Gruppenpsychother Gr, 140 Gesundheitswesen, 141 Acad Psychiatr, 142 Med Sci Law, 143 Art Psychother, 144 J Music Ther, 145 Indian J Soc Work, 146 Salud Publica Mexico, 147 Z Klin Psych Psychia, 148 Evol Psychiatr, 149 Nord Psychol, 150 Kriminalistik

#### 4 Healthcare (7.2%)

1 Am J Public Health, 2 Soc Sci Med, 3 Health Affair, 4 Med Care, 5 J Am Geriatr Soc, 6 Health Serv Res, 7 Gerontologist, 8 J Gerontol B-Psychol, 9 J Adv Nurs, 10 J Adolescent Health, 11 J Gerontol A-Biol, 12 Tob Control, 13 J Health Soc Behav, 14 Med Care Res Rev, 15 Am J Commun Psychol, 16 Public Health Rep, 17 Annu Rev Publ Health, 18 Milbank Q, 19 Sociol Health Ill, 20 J Health Polit Polic, 21 Health Educ Res, 22 Future Child, 23 Patient Educ Couns, 24 Health Educ Behav, 25 J Community Psychol, 26 Am J Manag Care, 27 Aids Care, 28 J School Health, 29 Am J Health Promot, 30 Nurs Res, 31 Res Nurs Health, 32 Int J Health Serv, 33 Health Policy, 34 Inquiry-J Health Car, 35 Aids Educ Prev, 36 Health Policy Plann, 37 Aust Nz J Publ Heal, 38 Res Aging, 39 Qual Health Res, 40 Aging Ment Health, 41 J Clin Nurs, 42 J Nurs Admin, 43 Health Care Manage R, 44 J Am Med Inform Assn, 45 J Aging Health, 46 Stud Family Plann, 47 Women

Health, 48 Health Place, 49 Generations, 50 Int J Aging Hum Dev, 51 J Nurs Scholarship, 52 J Rural Health, 53 Public Health Nurs, 54 Am J Health Behav, 55 Eval Program Plann, 56 Health Soc Care Comm, 57 Int J Nurs Stud, 58 Cancer Nurs, 59 Evaluation Rev, 60 Med Anthropol Q, 61 Ageing Soc, 62 Hispanic J Behav Sci, 63 Eur J Public Health, 64 Int Fam Plan Perspec, 65 Western J Nurs Res, 66 J Biosoc Sci, 67 Adv Nurs Sci, 68 J Health Care Poor U, 69 Am J Nurs, 70 J Nurs Educ, 71 Scand J Public Health, 72 J Aging Stud, 73 Nurs Outlook, 74 Can J Public Health, 75 Am J Occup Ther, 76 J Public Health Med, 77 Int J Qual Health C, 78 Birth-Iss Perinat C, 79 Aids Patient Care St, 80 Nurs Educ Today, 81 J Healthc Manag, 82 Cult Med Psychiat, 83 J Health Commun, 84 Health Promot Int, 85 Scand J Caring Sci, 86 Geriatr Nurs, 87 Can J Aging, 88 Nurs Ethics, 89 J Appl Gerontol, 90 J Prof Nurs, 91 J Commun Health, 92 Appl Nurs Res, 93 Public Health, 94 Child Care Hlth Dev, 95 Health Commun, 96 J Palliative Care, 97 Women Health Iss, 98 Nurs Sci Quart, 99 J Nurs Care Qual, 100 J Women Aging, 101 Midwifery, 102 J Elder Abuse Negl, 103 Nurs Clin N Am, 104 J Aging Phys Activ, 105 Int J Health Plan M, 106 Educ Gerontol, 107 Fam Community Health, 108 J Rehabil Res Dev, 109 Eval Health Prof, 110 Am J Eval, 111 Sci Soc Sante, 112 J Public Health Pol, 113 J Midwifery Wom Heal, 114 Rev Saude Publ, 115 Z Gerontol Geriatr, 116 Top Geriatr Rehabil, 117 J Perinat Neonat Nur

#### 5 Political Science (4.9%)

1 Am Polit Sci Rev, 2 Am J Polit Sci, 3 Int Organ, 4 World Polit, 5 J Polit, 6 Int Security, 7 J Conflict Resolut, 8 Comp Polit Stud, 9 J Democr, 10 Int Stud Quart, 11 Eur J Polit Res, 12 Comp Polit, 13 J Eur Public Policy, 14 J Peace Res, 15 Annu Rev Polit Sci, 16 J Common Mark Stud, 17 Brit J Polit Sci, 18 Polit Soc, 19 Public Opin Quart, 20 Polit Res Quart, 21 Polit Psychol, 22 Ps-Polit Sci Polit, 23 Legis Stud Quart, 24 Elect Stud, 25 J Theor Polit, 26 Third World Q, 27 Party Polit, 28 Wash Quart, 29 Governance, 30 Polit Stud-London, 31 Int Aff, 32 Rev Int Stud, 33 E Eur Polit Soc, 34 Int Polit Sci Rev, 35 Int Interact, 36 Polit Sci Quart, 37 Polit Theory, 38 Stud Comp Int Dev, 39 Eur J Int Relat, 40 Secur Stud, 41 Armed Forces Soc, 42 Hum Rights Quart, 43 Europe-Asia Stud, 44 Millennium-J Int St, 45 Post-Sov Aff, 46 Polit Behav, 47 Communis Post-Commun, 48 Lat Am Res Rev, 49 J Lat Am Stud, 50 Scand Polit Stud, 51 J Strategic Stud, 52 Judicature, 53 Glob Gov, 54 Policy Rev, 55 Polit Vierteljahr, 56 Defence Peace Econ, 57 Can J Polit Sci, 58 Publius J Federalism, 59 Gov Oppos, 60 Women Polit, 61 World Policy J, 62 Alternatives, 63 Dados-Rev Cienc Soc, 64 Aust J Polit Sci, 65 Polity, 66 Int J, 67 Aust J Int Aff, 68 Society, 69 Tidsskr Samfunnsfor, 70 Secur Dialogue, 71 J Baltic Stud, 72 Osteuropa, 73 Rev Etud Comp Est-O

## 6 Sociology (Behavioral) (4.4%)

1 Am Sociol Rev, 2 Am J Sociol, 3 J Marriage Fam, 4 Annu Rev Sociol, 5 Soc Forces, 6 Demography, 7 Criminology, 8 Am Behav Sci, 9 Soc Probl, 10 Popul Dev Rev, 11 Soc Psychol Quart, 12 Soc Sci Quart, 13 Ethnic Racial Stud, 14 Soc Sci Res, 15 J Fam Issues, 16 Theor Soc, 17 J Sci Stud Relig, 18 Law Soc Rev, 19 Gender Soc, 20 Pop Stud-J Demog, 21 J Quant Criminol, 22 Ann Am Acad Polit Ss, 23 Int Migr Rev, 24 J Res Crime Delinq, 25 Crime Delinquency, 26 Work Occupation, 27 Sociol Method Res, 28 Sociol Theor, 29 Sociol Quart, 30 Contemp Sociol, 31 Sociol Forum, 32 J Crim Just, 33 Eur Sociol Rev, 34 Sociol Relig, 35 Rural Sociol, 36 Sociol Perspect, 37 Soc Networks, 38 Youth Soc, 39 Eur J Popul, 40 Symb Interact, 41 J Comp Fam Stud, 42 Popul Res Policy Rev, 43 J Contemp Ethnogr, 44 Rev Relig Res, 45 Ration Soc, 46 Sociol Inq, 47 Deviant Behav, 48 Int Migr, 49 Kolner Z Soziol Soz, 50 Int Sociol, 51 Population, 52 Acta Sociol, 53 Z Soziol, 54 J Black Stud, 55 Qual Quant, 56 Can Rev Soc Anthropol, 57 Arch Eur Sociol, 58 Popul Environ, 59 Soc Sci J, 60 Can J Sociol, 61 Berl J Soziol, 62 Juvenile Fam Court J, 63 Soz Welt, 64 Sociol Spectrum, 65 Desarrollo Econ, 66 Soc Compass, 67 Soc Anim, 68 J Psychohist, 69 Man India

## 7 Management (4.1%)

1 J Appl Psychol, 2 Acad Manage J, 3 Acad Manage Rev, 4 Strategic Manage J, 5 Manage Sci, 6 Admin Sci Quart, 7 Organ Sci, 8 Res Policy, 9 J Organ Behav, 10 J Manage, 11 J Vocat Behav, 12 Pers Psychol, 13 Hum Relat, 14 J Manage Stud, 15 J Int Bus Stud, 16 Organ Stud, 17 Calif Manage Rev, 18 J Occup Organ Psych, 19 Hum Resource Manage, 20 Organization, 21 Leadership Quart, 22 Appl Psychol-Int Rev, 23 Group Organ Manage, 24 J Prod Innovat Manag, 25 Hum Perform, 26 J Bus Venturing, 27 Int J Select Assess, 28 Work Stress, 29 J Bus Ethics, 30 Small Gr Res, 31 Organ Dyn, 32 Ieee T Eng Manage, 33 Account Org Soc, 34 Int J Technol Manage, 35 J Bus Psychol, 36 J Organ Change Manag, 37 RFD Manage, 38 Long Range Plann, 39 J World Bus, 40 Int J Oper Prod Man, 41 Res Technol Manage, 42 Mil Psychol, 43 J Manage Inquiry, 44 Manage Learn, 45 Public Pers Manage, 46 J Small Bus Manage, 47 Technol Forecast Soc, 48 Time Soc, 49 Pers Rev, 50 Futures, 51 J Employment Couns, 52 Z Arb Organ, 53 Negotiation J, 54 Trav Humain, 55 Adult Educ Quart, 56 Gruppendynamik Organ

## 8 Law (3.9%)

1 Yale Law J, 2 Harvard Law Rev, 3 Stanford Law Rev, 4 Columbia Law Rev, 5 Va Law Rev, 6 Calif Law Rev, 7 U Chicago Law Rev, 8 U Penn Law Rev, 9 Mich Law Rev, 10 New York U Law Rev, 11 Am J Int Law, 12 Tex Law Rev, 13 Georgetown Law J, 14 Vanderbilt Law Rev, 15 Northwest U Law Rev, 16 J Legal Stud, 17 Cornell Law Rev, 18 Ucla Law Rev, 19 Duke Law J, 20 Minn Law Rev, 21 Fordham Law Rev, 22 Iowa Law Rev, 23 Indiana Law J, 24 Notre Dame Law

Rev, 25 South Calif Law Rev, 26 Boston U Law Rev, 27 U Illinois Law Rev, 28 Wisc Law Rev, 29 Bus Lawyer, 30 Harvard J Law Publ P, 31 George Wash Law Rev, 32 Admin Law Rev, 33 Law Social Inquiry, 34 Am Crim Law Rev, 35 U Cinci Law Rev, 36 Am J Law Med, 37 Hastings Law J, 38 Harvard Int Law J, 39 Am J Comp Law, 40 Columbia J Trans Law, 41 J Crim Law Crim, 42 Wash Law Rev, 43 Buffalo Law Rev, 44 Antitrust Law J, 45 Harvard J Legis, 46 U Pitt Law Rev, 47 Ecol Law Quart, 48 J Copyright Soc Usa, 49 J Int Econ Law, 50 Cornell Int Law J, 51 J Legal Educ, 52 Am Bus Law J, 53 U Pa J Int Econ Law, 54 Common Mkt Law Rev, 55 Rutgers Law Rev, 56 Cathol U Law Rev, 57 Fam Law Quart, 58 Food Drug Law J, 59 Am Bankrupt Law J, 60 Urban Lawyer, 61 Law Philos, 62 Denver U Law Rev, 63 Law Libr J, 64 Mil Law Rev, 65 J Legal Med, 66 Nat Resour J, 67 Columbia J Law Soc P, 68 Iic-Int Rev Intell P, 69 Issues Law Med, 70 Secur Regul Law J, 71 J Marit Law Commer

## 9 Education (2.7%)

1 J Educ Psychol, 2 Am Educ Res J, 3 Educ Psychol, 4 Phi Delta Kappan, 5 Educ Leadership, 6 Read Res Quart, 7 J Res Sci Teach, 8 Sci Educ, 9 Educ Eval Policy An, 10 Teach Coll Rec, 11 Elem School J, 12 Contemp Educ Psychol, 13 Cognition Instruct, 14 Int J Sci Educ, 15 J Learn Sci, 16 Sociol Educ, 17 Teach Teach Educ, 18 J Teach Educ, 19 Brit J Educ Psychol, 20 Read Teach, 21 Harvard Educ Rev, 22 Educ Psychol Rev, 23 Learn Instr, 24 J Educ Res, 25 J Adolesc Adult Lit, 26 Theor Pract, 27 J Res Math Educ, 28 J Lit Res, 29 Early Child Res Q, 30 Sch Eff Sch Improv, 31 J Curriculum Stud, 32 Urban Educ, 33 Educ Urban Soc, 34 Eur J Psychol Educ, 35 Educ Admin Quart, 36 High Educ, 37 Anthropol Educ Quart, 38 Educ Policy, 39 Res Teach Engl, 40 J Exp Educ, 41 Instr Sci, 42 Educ Res-Uk, 43 Curriculum Inq, 44 Comput Educ, 45 Stud High Educ, 46 Young Children, 47 EtrFd-Educ Tech Res, 48 Gifted Child Quart, 49 J Comput Assist Lear, 50 Brit J Educ Technol, 51 Interv Sch Clin, 52 J Educ Gifted

## 10 Geography (2.5%)

1 Urban Stud, 2 Environ Plann A, 3 Prog Hum Geog, 4 Int J Urban Regional, 5 Reg Stud, 6 Ann Assoc Am Geogr, 7 Environ Plann D, 8 Antipode, 9 T I Brit Geogr, 10 Polit Geogr, 11 Geoforum, 12 Hous Policy Debate, 13 Prof Geogr, 14 Urban Aff Rev, 15 J Hist Geogr, 16 Econ Geogr, 17 Area, 18 J Urban Aff, 19 J Am Plann Assoc, 20 Sociol Ruralis, 21 J Rural Stud, 22 Environ Plann B, 23 Housing Stud, 24 Urban Geogr, 25 Int J Geogr Inf Sci, 26 J Regional Sci, 27 Environ Plann C, 28 Pap Reg Sci, 29 Int Regional Sci Rev, 30 Rev Int Polit Econ, 31 Cities, 32 Geogr Anal, 33 Growth Change, 34 Ann Regional Sci, 35 Tijdschr Econ Soc Ge, 36 Eur Urban Reg Stud, 37 Landscape Urban Plan, 38 Econ Dev Q, 39 J Plan Educ Res, 40 Int Soc Sci J, 41 Can Geogr-Geogr Can, 42 Geogr Rev, 43 Land Use Policy, 44 Habitat Int, 45 Geogr J, 46 Environ Urban, 47 Singapore J Trop Geo, 48 Aust Geogr, 49 Geography, 50 Appl Geogr, 51 J Geogr Higher Educ,

52 Cartogr J, 53 J Archit Plan Res, 54 J Urban Technol, 55 Interdiscipl Sci Rev, 56 Geogr Z, 57 J Urban Plan D-Asce

### **11 Physical Anthropology (1.5%)**

1 Am J Phys Anthropol, 2 J Hum Evol, 3 Curr Anthropol, 4 J Archaeol Sci, 5 Am Anthropol, 6 Evol Anthropol, 7 Annu Rev Anthropol, 8 Am Antiquity, 9 J Anthropol Archaeol, 10 Int J Osteoarchaeol, 11 Am J Hum Biol, 12 Hum Organ, 13 Anthropologie, 14 Hum Ecol, 15 J Anthropol Res, 16 Scientist, 17 Plains Anthropol, 18 Arctic Anthropol, 19 Homo, 20 Collegium Antropol

### **12 Cultural Anthropology (1.2%)**

1 Public Culture, 2 Am Ethnol, 3 Cult Anthropol, 4 Signs, 5 J S Afr Stud, 6 Comp Stud Soc Hist, 7 Ids Bull-I Dev Stud, 8 J Roy Anthropol Inst, 9 Dev Change, 10 J Asian Stud, 11 Afr Affairs, 12 Feminist Stud, 13 Africa, 14 J Mod Afr Stud, 15 Glq-J Lesbian Gay St, 16 J Afr Hist, 17 Mod Asian Stud, 18 Identities-Glob Stud, 19 Lat Am Perspect, 20 Ethnohistory, 21 Anthropol Quart, 22 J Hist Sociol, 23 Ethnology, 24 Cult Stud, 25 Crit Anthropol, 26 J Peasant Stud, 27 Bijdr Taal-Land-V, 28 Disasters, 29 Homme, 30 Anthropos, 31 J Gender Stud, 32 Contrib Indian Soc, 33 Frontiers

### **13 Marketing (1.0%)**

1 J Marketing Res, 2 J Marketing, 3 Market Sci, 4 J Consum Res, 5 J Acad Market Sci, 6 J Bus Res, 7 J Retailing, 8 J Advertising Res, 9 Int J Res Mark, 10 J Advertising, 11 Ind Market Manag, 12 Psychol Market, 13 J Public Policy Mark, 14 Decision Sci, 15 J Int Marketing, 16 Int J Serv Ind Manag, 17 Adv Consum Res, 18 J Consum Aff, 19 Serv Ind J

### **14 Information Science (0.99%)**

1 J Am Soc Inf Sci Tec, 2 Scientometrics, 3 Coll Res Libr, 4 J Doc, 5 Inform Process Manag, 6 J Inf Sci, 7 Libr Trends, 8 J Acad Libr, 9 Libr Inform Sci Res, 10 Libr Quart, 11 Aslib Proc, 12 Learn Publ, 13 Ref User Serv Q, 14 Gov Inform Q, 15 Libri, 16 Inform Technol Libr, 17 Libr Resour Tech Ser, 18 J Libr Inf Sci, 19 Knowl Organ, 20 J Gov Inform, 21 Electron Libr, 22 Interlend Doc Supply, 23 Z Bibl Bibl

### **15 Philosophy of Science (0.98%)**

1 Stud Hist Philos Sci, 2 Philos Sci, 3 Soc Stud Sci, 4 Arch Hist Exact Sci, 5 Brit J Philos Sci, 6 Sci Context, 7 Biol Philos, 8 Osiris, 9 Hist Sci, 10 Isis, 11 Hist Math, 12 Synthese, 13 Brit J Hist Sci, 14 B Hist Med, 15 Med Hist, 16 Soc Hist Med, 17 Ann Sci, 18 Technol Cult, 19 J Hist Biol, 20 J Hist Behav Sci, 21 Philos Soc Sci, 22 J Hist Med All Sci, 23 Minerva, 24 Hist Stud Phys Biol, 25 Hist Phil Life Sci

### **16 Sociology (Institutional) (0.95%)**

1 Sociology, 2 Econ Soc, 3 Brit J Sociol, 4 Theor Cult Soc, 5 Work Employ Soc, 6 Brit J Sociol Educ, 7 Sociol Rev, 8 Brit J Ind Relat, 9 J Educ Policy, 10 Hist Hum Sci, 11 Women Stud Int Forum, 12 Oxford Rev Educ, 13 Soc Res, 14 Comp Educ, 15 Educ Stud, 16 Brit J Educ Stud, 17 New Tech Work Employ, 18 Z Padagog Psychol, 19 Int J Educ Dev, 20 Econ Ind Democracy, 21 Childhood, 22 Comp Educ Rev, 23 J Moral Educ, 24 Eur J Ind Relat, 25 Z Padagogik, 26 J Philos Educ, 27 Teach Sociol, 28 Psychol Erz Unterr, 29 Educ Rev, 30 Eur J Womens Stud

### **17 Communication (0.80%)**

1 J Commun, 2 Journalism Mass Comm, 3 Commun Res, 4 Polit Commun, 5 Hum Commun Res, 6 Commun Monogr, 7 J Broadcast Electron, 8 Sci Technol Hum Val, 9 Commun Theor, 10 Media Cult Soc, 11 Harv Int J PressOpol, 12 J Lang Soc Psychol, 13 Public Underst Sci, 14 Inform Soc, 15 Writ Commun, 16 Eur J Commun, 17 Telecommun Policy, 18 Int J Public Opin R, 19 Q J Speech, 20 Sci Commun, 21 Tech Commun, 22 J Media Econ, 23 J Bus Tech Commun, 24 Public Relat Rev

### **18 Educational Assessment (0.70%)**

1 Psychol Methods, 2 Psychometrika, 3 Educ Psychol Meas, 4 Appl Psych Meas, 5 Multivar Behav Res, 6 J Educ Meas, 7 J Educ Behav Stat, 8 Brit J Math Stat Psy, 9 Appl Meas Educ, 10 J Classif

### **19 Educational Psychology (0.66%)**

1 J School Psychol, 2 School Psychol Rev, 3 Except Children, 4 J Learn Disabil-US, 5 J Spec Educ, 6 Rem Spec Educ, 7 Psychol Schools, 8 School Psychol Quart, 9 J Emot Behav Disord, 10 Top Early Child Spec, 11 J Early Intervention, 12 School Psychol Int, 13 Learn Disability Q, 14 Am Ann Deaf, 15 J Psychoeduc Assess, 16 Infant Young Child, 17 J Educ Psychol Cons, 18 Volta Rev

### **20 Human-Computer Interface (0.54%)**

1 Mis Quart, 2 Inform Syst Res, 3 J Manage Inform Syst, 4 Comput Hum Behav, 5 Inform Manage-Amster, 6 Int J Hum-Comput St, 7 Cyberpsychol Behav, 8 Omega-Int J Manage S, 9 Behav Inform Technol, 10 Soc Sci Comput Rev, 11 Int J Electron Comm, 12 Int J Inform Manage, 13 J Inf Technol, 14 Interact Comput, 15 Int J Hum-Comput Int, 16 Inform Syst J, 17 Group Decis Negot

## **21 Applied Linguistics (0.51%)**

1 J Pragmatics, 2 Discourse Soc, 3 Lang Soc, 4 Res Lang Soc Interac, 5 Tesol Quart, 6 Mod Lang J, 7 Appl Linguist, 8 Language, 9 Lang Learn, 10 Lang Commun, 11 Linguistics, 12 Can Mod Lang Rev, 13 Lingua, 14 Am Speech, 15 Foreign Lang Ann

## **22 Experimental Psychology (0.49%)**

1 J Exp Anal Behav, 2 J Exp Psychol Anim B, 3 Physiol Behav, 4 Behav Process, 5 J Comp Psychol, 6 Q J Exp Psychol-B, 7 Psychol Rec, 8 Learn Motiv, 9 Behav Analyst, 10 Neurobiol Learn Mem, 11 Integr Phys Beh Sci, 12 Jpn Psychol Res

## **23 History (0.46%)**

1 Am Hist Rev, 2 J Am Hist, 3 Environ Hist, 4 Slavic Rev, 5 J Mod Hist, 6 Past Present, 7 Continuity Change, 8 J Fam Hist, 9 Labor Hist, 10 Int Rev Soc Hist, 11 J Soc Hist, 12 J Urban Hist, 13 J Hist Sexuality, 14 E Eur Quart, 15 Crit Rev

## **24 Social Work (0.40%)**

1 Soc Work, 2 Child Youth Serv Rev, 3 Fam Soc-J Contemp H, 4 Soc Serv Rev, 5 Res Social Work Prac, 6 Soc Work Res, 7 Soc Work Health Care, 8 Brit J Soc Work, 9 Health Soc Work, 10 J Soc Work Educ, 11 Affilia J Wom Soc Wo, 12 J Soc Serv Res, 13 Smith Coll Stud Soc, 14 Int Soc Work, 15 Clin Soc Work J, 16 Admin Soc Work

## **25 Speech And Hearing (0.40%)**

1 J Speech Lang Hear R, 2 Appl Psycholinguist, 3 Int J Lang Comm Dis, 4 J Phonetics, 5 Lang Speech Hear Ser, 6 Clin Linguist Phonet, 7 J Commun Disord, 8 Phonetica, 9 J Fluency Disord, 10 Top Lang Disord, 11 Folia Phoniatri Logo

## **26 Disabilities (0.39%)**

1 Am J Ment Retard, 2 J Intell Disabil Res, 3 J Appl Behav Anal, 4 Behav Modif, 5 Disabil Soc, 6 Res Dev Disabil, 7 Ment Retard, 8 J Appl Res Intellect, 9 J Dev Phys Disabil, 10 Res Pract Pers Sev D

## **27 Transportation (0.39%)**

1 Transport Res A-Pol, 2 J Oper Res Soc, 3 Transport Res B-Meth, 4 Interfaces, 5 Transport Sci, 6 Transportation, 7 J Transp Econ Policy, 8 Transport Res E-Log, 9 Syst Dynam Rev, 10 Syst Res Behav Sci, 11 Transport Res D-Tr E, 12 Transport Rev, 13 Syst Pract Act Res, 14 Transport J

## **28 Psychoanalysis (0.38%)**

1 J Am Psychoanal Ass, 2 Int J Psychoanal, 3 Psychoanal Quart, 4 Psychoanal Inq, 5 Psychoanal Psychol, 6 Psyche-Z Psychoanal, 7 Contemp Psychoanal, 8 Forum Psychoanal, 9 J Anal Psychol

## **29 Guidance Counseling (0.36%)**

1 J Couns Psychol, 2 Couns Psychol, 3 J Couns Dev, 4 J Career Assessment, 5 Meas Eval Couns Dev, 6 Career Dev Q, 7 J Multicult Couns D, 8 J Career Dev, 9 Brit J Guid Couns, 10 Fed Probat, 11 Women Ther

## **30 Middle Eastern Studies (0.35%)**

1 Int J Middle E Stud, 2 New Left Rev, 3 Middle Eastern Stud, 4 Middle East J, 5 Mon Rev, 6 Sci Soc, 7 Race Class

## **31 East Asian Studies (0.35%)**

1 China Quart, 2 China J, 3 Asian Surv, 4 Mod China, 5 Issues Stud, 6 Pac Rev, 7 J Contemp Asia, 8 Pac Aff

## **32 Ergonomics (0.34%)**

1 Ergonomics, 2 Accident Anal Prev, 3 Hum Factors, 4 Appl Ergon, 5 Int J Ind Ergonom, 6 J Safety Res, 7 Int J Aviat Psychol, 8 J Occup Rehabil

## **33 Medical Ethics (0.33%)**

1 Hastings Cent Rep, 2 J Med Ethics, 3 J Law Med Ethics, 4 Bioethics, 5 Kennedy Inst Ethic J, 6 J Clin Ethic, 7 J Med Philos, 8 Health Care Anal, 9 Camb Q Healthc Ethic, 10 Sci Eng Ethics, 11 Theor Med Bioeth

## **34 Public Administration (0.26%)**

1 Public Admin Rev, 2 Soc Natur Resour, 3 Nonprof Volunt Sec Q, 4 Admin Soc, 5 Policy Sci, 6 Policy Stud J, 7 Am Rev Public Adm, 8 Int Rev Adm Sci, 9 Can Public Admin

## **35 Ethics (0.26%)**

1 Ethics, 2 Inquiry, 3 Soc Philos Policy, 4 Environ Ethics, 5 Hum Stud, 6 Environ Value, 7 J Agr Environ Ethic

### **36 Economic History (0.26%)**

1 J Econ Hist, 2 Econ Hist Rev, 3 Explor Econ Hist, 4 Bus Hist, 5 Soc Sci Hist, 6 J Interdiscipl Hist, 7 Agr Hist

### **37 Sport Psychology (0.25%)**

1 Res Q Exercise Sport, 2 J Sport Exercise Psy, 3 Quest, 4 J Appl Sport Psychol, 5 J Teach Phys Educ, 6 Sport Psychol, 7 Int J Sport Psychol, 8 Sociol Sport J, 9 J Sport Hist

### **38 Public Affairs (0.22%)**

1 Public Admin, 2 Parliament Aff, 3 Polit Quart, 4 Local Gov Stud, 5 Public Money Manage, 6 Public Admin Develop, 7 Aust J Publ Admin

### **39 Social Policy (0.19%)**

1 Soc Policy Admin, 2 Policy Polit, 3 J Eur Soc Policy, 4 J Soc Policy, 5 Soc Polit, 6 Aust J Soc Issues

### **40 Family Relations (0.18%)**

1 Fam Relat, 2 Fam Process, 3 J Marital Fam Ther, 4 Am J Fam Ther, 5 J Fam Ther, 6 Contemp Fam Ther

### **41 Law And Behavior (0.17%)**

1 Law Human Behav, 2 Psychol Public Pol L, 3 Psychol Crime Law

### **42 Criminology (0.16%)**

1 Brit J Criminol, 2 J Law Soc, 3 Crime Law Social Ch, 4 Soc Legal Stud, 5 Int J Sociol Law, 6 Aust Nz J Criminol, 7 Crim Law Rev

### **43 Sexuality (0.16%)**

1 Arch Sex Behav, 2 J Sex Res, 3 J Sex Marital Ther, 4 J Homosexual

### **44 Higher Education (0.14%)**

1 J Coll Student Dev, 2 Res High Educ, 3 J High Educ, 4 Rev High Educ

### **45 Leisure Studies (0.14%)**

1 Environ Behav, 2 J Environ Psychol, 3 J Leisure Res, 4 Leisure Sci

### **46 Neurorehabilitation (0.14%)**

1 J Head Trauma Rehab, 2 Rehabil Psychol, 3 Neurorehabilitation, 4 Rehabil Couns Bull, 5 J Rehabil, 6 Int J Rehabil Res

### **47 Pacific Studies (0.10%)**

1 Contemp Pacific, 2 Oceania, 3 J Polynesian Soc, 4 J Mat Cult

### **48 Tourism (0.093%)**

1 Ann Tourism Res, 2 Tourism Manage

### **49 Creativity (0.073%)**

1 Creativity Res J, 2 J Creative Behav

### **50 Death And Dying (0.061%)**

1 Death Stud, 2 Omega-J Death Dying

### **51 Sociology (French) (0.059%)**

1 Psikhol Zh, 2 Vop Psikhol+, 3 Sociol Cas, 4 Sotsiol Issled+

### **52 Sociology (Eastern Europe) (0.054%)**

1 Sociol Trav, 2 Rev Fr Sociol, 3 Mouvement Soc

### **53 Maritime Law (0.048%)**

1 Mar Policy, 2 Ocean Dev Int Law

### **54 Hypnosis (0.028%)**

1 Int J Clin Exp Hyp, 2 Am J Clin Hypn
